# Supplementary material for: Resistance Broken: Integrated Genomic and Phenotypic Insights into Tomato Spotted Wilt Virus Strains Overcoming Sw-5b and Tsw Resistance
Source: Research Square preprint supplement (doi:10.21203/rs.3.rs-7776191/v1), 2025-10-10
Supplement: Supplementary file 1 [file 640ba191bfece0f1480e19c9.xlsx]

## Sheet: Nucleotide similarities
Supplementary Table S3 Sequence similarty matrices for 1. Tomato group: a) Full genome b) L Segemnt C) M segment d) S segment e) RdRP f) GnGc g) NSm h) NSs and i) N gene 2. Pepper group: a) S segment b) NSs and c) N gene
1. Tomato group
a. Tomato_TSWV full genome
	PP622751_PP622752_PP622753_Tom_BL1_RB	PP622754_PP622755_PP622756_Tom_BL2_RB	PP632104_PP632105_PP632106_Tom_CA_RB	PP622757_PP632102_PP632103_Tom_MX_RB	OR166268_OR166267_OR166266_Tom_RB_IT	KP008130_HM015520_KP008131_Tom_RB_SP	OQ718495_OQ718496_OQ718497_Tom_RB_MX	HM581934_HM581935_HM581936_Tom_NRB_SK	KC261968_KC261969_KC261970_Tom_NRB_SK	ON840007_ON840008_ON840009_Tom_NRB_IT	ON840010_ON840011_ON840012_Tom_NRB_IT	KP008128_FM163373_KP008129_Tom_NRB_SP	MF590700_KY495608_KY495612_Tom_NRB_CN	JF960237_JF960236_JF960235_Tom_NRB_CN	MH745369_KU179512_KU179513_Tom_NRB_US	KY250488_KY250489_KY250490_Tom_NRB_SA	OL471955_OL471956_OL471957_Tom_NRB_SI	OL471949_OL471950_OL471951_Tom_NRB_SI	KM365064_KM365065_KM365066_Tom_NRB_AU	KC261965_KC261966_KC261967_Let_NRB_SK	KC261971_KC261972_KC261973_Ste_NRB_SK	KC261974_KC261975_KC261976_Chr_NRB_SK	KM076651_KM076652_KM076653_Leo_NRB_SK	MN493846_MN493847_MN493848_Zin_NRB_CN	MN870626_MN870630_MN861979_Tob_NRB_CN	MT241883_MT241884_MT241885_Tro_NRB_CN	MH745370_KU179514_KU179515_Oci_NRB_US	MG593197_MG593198_MG593199_Dat_NRB_US	OL471961_OL471962_OL471963_Wee_NRB_SI	MG602671_MG602672_MG602673_Chr_NRB_ZW	MW854271_MW854272_MW854273_Tob_NRB_BG
PP622751_PP622752_PP622753_Tom_BL1_RB		99.086	94.813	98.892	97.43	95.137	94.329	96.102	96.079	97.172	97.25	97.307	94.954	94.996	97.533	94.091	97.25	97.28	94.119	95.126	89.731	93.948	95.467	95.54	95.607	96.757	96.984	95.29	97.244	94.098	95.095
PP622754_PP622755_PP622756_Tom_BL2_RB	99.086		94.898	98.905	97.492	95.306	94.444	96.235	96.211	97.245	97.372	97.441	95.106	95.172	97.582	94.259	97.348	97.378	94.174	95.277	89.823	94.128	95.6	95.781	95.854	96.914	97.04	95.441	97.342	94.226	95.162
PP632104_PP632105_PP632106_Tom_CA_RB	94.813	94.898		94.651	95.088	93.529	97.864	94.204	94.181	94.962	95.028	95.172	94.037	94.044	95.232	92.952	95.093	95.094	92.323	93.34	88.029	95.299	94.69	94.808	94.874	94.745	95.134	94.415	95.087	92.833	93.098
PP622757_PP632102_PP632103_Tom_MX_RB	98.892	98.905	94.651		97.316	95.089	94.179	96.054	96.037	97.046	97.142	97.216	94.906	94.936	97.425	94.019	97.124	97.148	94.023	95.066	89.593	93.852	95.395	95.432	95.517	96.649	96.84	95.23	97.118	94.009	94.945
OR166268_OR166267_OR166266_Tom_RB_IT	97.43	97.492	95.088	97.316		96.47	94.683	96.757	96.734	98.066	98.493	98.523	95.421	95.463	98.097	94.868	97.778	97.808	94.746	96.441	90.902	94.444	96.022	96.137	96.389	97.718	97.458	95.653	97.772	94.893	95.656
KP008130_HM015520_KP008131_Tom_RB_SP	95.137	95.306	93.529	95.089	96.47		93.022	95.881	95.834	95.388	95.997	96.193	94.744	94.75	95.735	96.673	95.453	95.483	96.342	99.018	93.487	93.239	95.128	94.513	94.592	96.072	95.371	94.455	95.447	96.669	97.653
OQ718495_OQ718496_OQ718497_Tom_RB_MX	94.329	94.444	97.864	94.179	94.683	93.022		93.762	93.739	94.604	94.58	94.747	93.972	93.973	94.85	92.749	94.711	94.73	91.857	92.88	87.792	96.139	94.398	94.749	94.822	94.261	94.794	94.392	94.705	92.577	92.692
HM581934_HM581935_HM581936_Tom_NRB_SK	96.102	96.235	94.204	96.054	96.757	95.881	93.762		99.346	96.216	96.611	96.701	95.714	95.739	96.605	94.649	96.323	96.353	94.665	95.816	90.339	94.192	98.393	95.318	95.348	97.554	96.288	95.709	96.317	94.692	95.264
KC261968_KC261969_KC261970_Tom_NRB_SK	96.079	96.211	94.181	96.037	96.734	95.834	93.739	99.346		96.198	96.582	96.678	95.697	95.721	96.546	94.614	96.282	96.324	94.534	95.798	90.317	94.169	98.393	95.313	95.337	97.5	96.253	95.716	96.276	94.669	95.229
ON840007_ON840008_ON840009_Tom_NRB_IT	97.172	97.245	94.962	97.046	98.066	95.388	94.604	96.216	96.198		98.031	97.565	95.278	95.296	97.917	94.437	99.085	99.103	94.261	95.371	89.939	94.425	95.586	96.013	96.105	96.901	97.254	95.54	99.079	94.528	95.142
ON840010_ON840011_ON840012_Tom_NRB_IT	97.25	97.372	95.028	97.142	98.493	95.997	94.58	96.611	96.582	98.031		98.302	95.302	95.344	98.056	94.425	98.049	98.079	94.303	95.98	90.453	94.221	95.91	95.869	95.967	97.562	97.302	95.595	98.043	94.492	95.177
KP008128_FM163373_KP008129_Tom_NRB_SP	97.307	97.441	95.172	97.216	98.523	96.193	94.747	96.701	96.678	97.565	98.302		95.381	95.429	97.976	94.639	97.722	97.752	94.432	96.17	90.586	94.296	95.956	96.113	96.036	97.782	97.462	95.705	97.716	94.634	95.322
MF590700_KY495608_KY495612_Tom_NRB_CN	94.954	95.106	94.037	94.906	95.421	94.744	93.972	95.714	95.697	95.278	95.302	95.381		99.394	95.464	94.361	95.338	95.368	93.856	94.649	89.357	94.366	95.367	97.473	97.546	95.325	95.226	96.845	95.332	94.183	94.33
JF960237_JF960236_JF960235_Tom_NRB_CN	94.996	95.172	94.044	94.936	95.463	94.75	93.973	95.739	95.721	95.296	95.344	95.429	99.394		95.494	94.326	95.404	95.434	93.839	94.691	89.381	94.361	95.416	97.467	97.551	95.337	95.262	96.863	95.398	94.16	94.336
MH745369_KU179512_KU179513_Tom_NRB_US	97.533	97.582	95.232	97.425	98.097	95.735	94.85	96.605	96.546	97.917	98.056	97.976	95.464	95.494		94.617	98.032	98.05	94.65	95.688	90.202	94.515	95.904	96.055	96.14	97.327	97.717	95.81	98.026	94.594	95.381
KY250488_KY250489_KY250490_Tom_NRB_SA	94.091	94.259	92.952	94.019	94.868	96.673	92.749	94.649	94.614	94.437	94.425	94.639	94.361	94.326	94.617		94.521	94.562	95.248	96.626	91.269	92.904	94.165	94.302	94.335	94.712	94.33	94.201	94.515	96.601	96.414
OL471955_OL471956_OL471957_Tom_NRB_SI	97.25	97.348	95.093	97.124	97.778	95.453	94.711	96.323	96.282	99.085	98.049	97.722	95.338	95.404	98.032	94.521		99.825	94.333	95.454	90.016	94.383	95.676	95.971	96.062	96.973	97.344	95.636	99.994	94.522	95.171
OL471949_OL471950_OL471951_Tom_NRB_SI	97.28	97.378	95.094	97.148	97.808	95.483	94.73	96.353	96.324	99.103	98.079	97.752	95.368	95.434	98.05	94.562	99.825		94.351	95.484	90.034	94.395	95.706	96.001	96.068	97.015	97.386	95.666	99.819	94.54	95.219
KM365064_KM365065_KM365066_Tom_NRB_AU	94.119	94.174	92.323	94.023	94.746	96.342	91.857	94.665	94.534	94.261	94.303	94.432	93.856	93.839	94.65	95.248	94.333	94.351		96.253	91.187	92.261	93.99	93.34	93.424	94.378	94.324	93.636	94.327	95.166	96.542
KC261965_KC261966_KC261967_Let_NRB_SK	95.126	95.277	93.34	95.066	96.441	99.018	92.88	95.816	95.798	95.371	95.98	96.17	94.649	94.691	95.688	96.626	95.454	95.484	96.253		94.145	93.038	95.039	94.395	94.515	96.072	95.324	94.397	95.448	96.592	97.636
KC261971_KC261972_KC261973_Ste_NRB_SK	89.731	89.823	88.029	89.593	90.902	93.487	87.792	90.339	90.317	89.939	90.453	90.586	89.357	89.381	90.202	91.269	90.016	90.034	91.187	94.145		87.941	89.551	89.075	89.208	90.554	89.901	89.134	90.01	91.274	92.585
KC261974_KC261975_KC261976_Chr_NRB_SK	93.948	94.128	95.299	93.852	94.444	93.239	96.139	94.192	94.169	94.425	94.221	94.296	94.366	94.361	94.515	92.904	94.383	94.395	92.261	93.038	87.941		95.328	94.475	94.65	93.987	94.169	94.681	94.377	92.831	92.902
KM076651_KM076652_KM076653_Leo_NRB_SK	95.467	95.6	94.69	95.395	96.022	95.128	94.398	98.393	98.393	95.586	95.91	95.956	95.367	95.416	95.904	94.165	95.676	95.706	93.99	95.039	89.551	95.328		94.983	95.019	96.781	95.653	95.398	95.67	94.298	94.589
MN493846_MN493847_MN493848_Zin_NRB_CN	95.54	95.781	94.808	95.432	96.137	94.513	94.749	95.318	95.313	96.013	95.869	96.113	97.473	97.467	96.055	94.302	95.971	96.001	93.34	94.395	89.075	94.475	94.983		98.971	96.091	95.853	96.814	95.965	93.947	94.181
MN870626_MN870630_MN861979_Tob_NRB_CN	95.607	95.854	94.874	95.517	96.389	94.592	94.822	95.348	95.337	96.105	95.967	96.036	97.546	97.551	96.14	94.335	96.062	96.068	93.424	94.515	89.208	94.65	95.019	98.971		95.783	95.884	96.823	96.056	94.045	94.22
MT241883_MT241884_MT241885_Tro_NRB_CN	96.757	96.914	94.745	96.649	97.718	96.072	94.261	97.554	97.5	96.901	97.562	97.782	95.325	95.337	97.327	94.712	96.973	97.015	94.378	96.072	90.554	93.987	96.781	96.091	95.783		96.844	95.483	96.967	94.614	95.323
MH745370_KU179514_KU179515_Oci_NRB_US	96.984	97.04	95.134	96.84	97.458	95.371	94.794	96.288	96.253	97.254	97.302	97.462	95.226	95.262	97.717	94.33	97.344	97.386	94.324	95.324	89.901	94.169	95.653	95.853	95.884	96.844		95.465	97.338	94.356	95.112
MG593197_MG593198_MG593199_Dat_NRB_US	95.29	95.441	94.415	95.23	95.653	94.455	94.392	95.709	95.716	95.54	95.595	95.705	96.845	96.863	95.81	94.201	95.636	95.666	93.636	94.397	89.134	94.681	95.398	96.814	96.823	95.483	95.465		95.63	94.04	94.177
OL471961_OL471962_OL471963_Wee_NRB_SI	97.244	97.342	95.087	97.118	97.772	95.447	94.705	96.317	96.276	99.079	98.043	97.716	95.332	95.398	98.026	94.515	99.994	99.819	94.327	95.448	90.01	94.377	95.67	95.965	96.056	96.967	97.338	95.63		94.516	95.171
MG602671_MG602672_MG602673_Chr_NRB_ZW	94.098	94.226	92.833	94.009	94.893	96.669	92.577	94.692	94.669	94.528	94.492	94.634	94.183	94.16	94.594	96.601	94.522	94.54	95.166	96.592	91.274	92.831	94.298	93.947	94.045	94.614	94.356	94.04	94.516		96.44
MW854271_MW854272_MW854273_Tob_NRB_BG	95.095	95.162	93.098	94.945	95.656	97.653	92.692	95.264	95.229	95.142	95.177	95.322	94.33	94.336	95.381	96.414	95.171	95.219	96.542	97.636	92.585	92.902	94.589	94.181	94.22	95.323	95.112	94.177	95.171	96.44
b. Tomato_L segment
	PP622751_Tom_BL1_RB	PP622754_Tom_BL2_RB	PP632104_Tom_CA_RB	PP622757_Tom_MX_RB	OR166268_Tom_RB_IT	KP008130_Tom_RB_SP	OQ718495_Tom_RB_MX	HM581934_Tom_NRB_SK	KC261968_Tom_NRB_SK	ON840007_Tom_NRB_IT	ON840010_Tom_NRB_IT	KP008128_Tom_NRB_SP	MF590700_Tom_NRB_CN	JF960237_Tom_NRB_CN	MH745369_Tom_NRB_US	KY250488_Tom_NRB_SA	OL471955_Tom_NRB_SI	OL471949_Tom_NRB_SI	KM365064_Tom_NRB_AU	KC261965_Let_NRB_SK	KC261971_Ste_NRB_SK	KC261974_Chr_NRB_SK	KM076651_Leo_NRB_SK	MN493846_Zin_NRB_CN	MN870626_Tob_NRB_CN	MT241883_Tro_NRB_CN	MH745370_Oci_NRB_US	MG593197_Dat_NRB_US	OL471961_Wee_NRB_SI	MG602671_Chr_NRB_ZW	MW854271_Tob_NRB_BG
PP622751_Tom_BL1_RB		99.215	94.851	98.934	97.756	97.655	92.921	97.083	97.05	97.151	97.375	97.644	95.176	95.099	97.543	96.13	97.195	97.218	97.191	97.397	97.569	93.258	95.827	95.232	95.3	97.375	97.027	94.933	97.195	96.018	98.005
PP622754_Tom_BL2_RB	99.215		95.109	99.248	98.048	97.969	93.19	97.352	97.319	97.42	97.689	97.958	95.513	95.458	97.745	96.376	97.487	97.51	97.349	97.7	97.757	93.572	96.096	95.569	95.636	97.667	97.296	95.213	97.487	96.287	98.107
PP632104_Tom_CA_RB	94.851	95.109		94.795	95.367	95.513	97.42	94.806	94.795	94.985	94.997	95.333	94.413	94.337	95.12	94.683	95.03	95.03	94.861	95.008	95.063	96.399	95.737	94.402	94.492	95.131	94.761	94.058	95.03	94.525	95.154
PP622757_Tom_MX_RB	98.934	99.248	94.795		97.745	97.644	92.899	97.094	97.061	97.139	97.364	97.633	95.21	95.133	97.51	96.085	97.162	97.184	97.09	97.375	97.369	93.235	95.816	95.266	95.333	97.364	97.038	94.955	97.162	95.961	97.859
OR166268_Tom_RB_IT	97.756	98.048	95.367	97.745		99.54	93.628	98.317	98.261	97.958	99.338	99.596	95.973	95.895	98.441	96.982	98.026	98.048	97.844	99.293	99.374	93.953	96.893	96.006	96.062	99.226	97.936	95.661	98.026	96.803	98.411
KP008130_Tom_RB_SP	97.655	97.969	95.513	97.644	99.54		93.65	98.239	98.183	97.925	99.148	99.495	95.905	95.851	98.351	96.893	97.992	98.014	97.743	99.17	99.248	94.099	96.859	95.961	95.995	99.035	97.835	95.594	97.992	96.792	98.287
OQ718495_Tom_RB_MX	92.921	93.19	97.42	92.899	93.628	93.65		93.101	93.067	93.314	93.225	93.65	93.37	93.294	93.426	93.449	93.325	93.37	93.217	93.235	93.447	96.893	94.256	93.37	93.46	93.348	93.134	93.083	93.325	93.157	93.52
HM581934_Tom_NRB_SK	97.083	97.352	94.806	97.094	98.317	98.239	93.101		99.428	97.229	97.925	98.25	95.49	95.413	97.611	96.287	97.274	97.296	97.112	97.969	97.97	93.493	97.711	95.558	95.602	97.857	97.173	95.235	97.274	96.264	97.588
KC261968_Tom_NRB_SK	97.05	97.319	94.795	97.061	98.261	98.183	93.067	99.428		97.195	97.869	98.194	95.457	95.391	97.532	96.242	97.24	97.263	97.011	97.913	97.92	93.449	97.655	95.524	95.569	97.801	97.139	95.247	97.24	96.264	97.555
ON840007_Tom_NRB_IT	97.151	97.42	94.985	97.139	97.958	97.925	93.314	97.229	97.195		97.611	97.891	95.602	95.503	97.768	96.623	99.641	99.641	97.326	97.711	97.782	93.684	95.984	95.614	95.692	97.588	97.33	95.303	99.641	96.522	97.836
ON840010_Tom_NRB_IT	97.375	97.689	94.997	97.364	99.338	99.148	93.225	97.925	97.869	97.611		99.181	95.625	95.548	98.015	96.601	97.678	97.701	97.473	98.878	98.922	93.629	96.545	95.659	95.715	98.789	97.521	95.359	97.678	96.478	98.006
KP008128_Tom_NRB_SP	97.644	97.958	95.333	97.633	99.596	99.495	93.65	98.25	98.194	97.891	99.181		95.984	95.94	98.34	96.926	97.981	98.003	97.777	99.248	99.273	93.998	96.825	96.018	96.074	99.091	97.869	95.717	97.981	96.769	98.298
MF590700_Tom_NRB_CN	95.176	95.513	94.413	95.21	95.973	95.905	93.37	95.49	95.457	95.602	95.625	95.984		99.394	95.659	95.625	95.647	95.67	95.48	95.602	95.665	93.763	94.862	99.574	99.607	95.737	95.434	97.231	95.647	95.344	95.763
JF960237_Tom_NRB_CN	95.099	95.458	94.337	95.133	95.895	95.851	93.294	95.413	95.391	95.503	95.548	95.94	99.394		95.559	95.503	95.593	95.615	95.403	95.593	95.641	93.675	94.819	99.417	99.45	95.615	95.357	97.097	95.593	95.234	95.685
MH745369_Tom_NRB_US	97.543	97.745	95.12	97.51	98.441	98.351	93.426	97.611	97.532	97.768	98.015	98.34	95.659	95.559		96.713	97.835	97.857	97.821	98.07	98.045	93.807	96.276	95.715	95.771	98.048	97.902	95.37	97.835	96.5	98.107
KY250488_Tom_NRB_SA	96.13	96.376	94.683	96.085	96.982	96.893	93.449	96.287	96.242	96.623	96.601	96.926	95.625	95.503	96.713		96.691	96.735	96.437	96.657	96.767	93.83	95.4	95.703	95.692	96.724	96.276	95.291	96.691	97.151	96.788
OL471955_Tom_NRB_SI	97.195	97.487	95.03	97.162	98.026	97.992	93.325	97.274	97.24	99.641	97.678	97.981	95.647	95.593	97.835	96.691		99.843	97.394	97.801	97.87	93.718	96.04	95.681	95.759	97.633	97.397	95.336	100	96.522	97.881
OL471949_Tom_NRB_SI	97.218	97.51	95.03	97.184	98.048	98.014	93.37	97.296	97.263	99.641	97.701	98.003	95.67	95.615	97.857	96.735	99.843		97.416	97.824	97.895	93.74	96.04	95.703	95.782	97.655	97.442	95.359	99.843	96.545	97.927
KM365064_Tom_NRB_AU	97.191	97.349	94.861	97.09	97.844	97.743	93.217	97.112	97.011	97.326	97.473	97.777	95.48	95.403	97.821	96.437	97.394	97.416		97.439	97.538	93.578	95.863	95.469	95.525	97.45	97.371	95.326	97.394	96.223	97.718
KC261965_Let_NRB_SK	97.397	97.7	95.008	97.375	99.293	99.17	93.235	97.969	97.913	97.711	98.878	99.248	95.602	95.593	98.07	96.657	97.801	97.824	97.439		99.712	93.606	96.511	95.659	95.692	98.788	97.577	95.325	97.801	96.511	98.05
KC261971_Ste_NRB_SK	97.569	97.757	95.063	97.369	99.374	99.248	93.447	97.97	97.92	97.782	98.922	99.273	95.665	95.641	98.045	96.767	97.87	97.895	97.538	99.712		93.86	96.341	95.752	95.777	98.847	97.682	95.552	97.87	96.68	98.106
KC261974_Chr_NRB_SK	93.258	93.572	96.399	93.235	93.953	94.099	96.893	93.493	93.449	93.684	93.629	93.998	93.763	93.675	93.807	93.83	93.718	93.74	93.578	93.606	93.86		95.412	93.751	93.852	93.729	93.437	93.52	93.718	93.583	93.904
KM076651_Leo_NRB_SK	95.827	96.096	95.737	95.816	96.893	96.859	94.256	97.711	97.655	95.984	96.545	96.825	94.862	94.819	96.276	95.4	96.04	96.04	95.863	96.511	96.341	95.412		94.896	94.985	96.511	95.95	94.63	96.04	95.501	96.36
MN493846_Zin_NRB_CN	95.232	95.569	94.402	95.266	96.006	95.961	93.37	95.558	95.524	95.614	95.659	96.018	99.574	99.417	95.715	95.703	95.681	95.703	95.469	95.659	95.752	93.751	94.896		99.652	95.726	95.49	97.209	95.681	95.389	95.797
MN870626_Tob_NRB_CN	95.3	95.636	94.492	95.333	96.062	95.995	93.46	95.602	95.569	95.692	95.715	96.074	99.607	99.45	95.771	95.692	95.759	95.782	95.525	95.692	95.777	93.852	94.985	99.652		95.782	95.524	97.265	95.759	95.423	95.864
MT241883_Tro_NRB_CN	97.375	97.667	95.131	97.364	99.226	99.035	93.348	97.857	97.801	97.588	98.789	99.091	95.737	95.615	98.048	96.724	97.633	97.655	97.45	98.788	98.847	93.729	96.511	95.726	95.782		97.566	95.415	97.633	96.556	97.994
MH745370_Oci_NRB_US	97.027	97.296	94.761	97.038	97.936	97.835	93.134	97.173	97.139	97.33	97.521	97.869	95.434	95.357	97.902	96.276	97.397	97.442	97.371	97.577	97.682	93.437	95.95	95.49	95.524	97.566		95.101	97.397	96.141	97.645
MG593197_Dat_NRB_US	94.933	95.213	94.058	94.955	95.661	95.594	93.083	95.235	95.247	95.303	95.359	95.717	97.231	97.097	95.37	95.291	95.336	95.359	95.326	95.325	95.552	93.52	94.63	97.209	97.265	95.415	95.101		95.336	95.078	95.484
OL471961_Wee_NRB_SI	97.195	97.487	95.03	97.162	98.026	97.992	93.325	97.274	97.24	99.641	97.678	97.981	95.647	95.593	97.835	96.691	100	99.843	97.394	97.801	97.87	93.718	96.04	95.681	95.759	97.633	97.397	95.336		96.522	97.881
MG602671_Chr_NRB_ZW	96.018	96.287	94.525	95.961	96.803	96.792	93.157	96.264	96.264	96.522	96.478	96.769	95.344	95.234	96.5	97.151	96.522	96.545	96.223	96.511	96.68	93.583	95.501	95.389	95.423	96.556	96.141	95.078	96.522		96.619
MW854271_Tob_NRB_BG	98.005	98.107	95.154	97.859	98.411	98.287	93.52	97.588	97.555	97.836	98.006	98.298	95.763	95.685	98.107	96.788	97.881	97.927	97.718	98.05	98.106	93.904	96.36	95.797	95.864	97.994	97.645	95.484	97.881	96.619
c. Tomato_M segment
	PP622752_Tom_BL1_RB	PP622755_Tom_BL2_RB	PP632105_Tom_CA_RB	PP632102_Tom_MX_RB	OR166267_Tom_RB_IT	HM015520_Tom_RB_SP	OQ718496_Tom_RB_MX	HM581935_Tom_NRB_SK	KC261969_Tom_NRB_SK	ON840008_Tom_NRB_IT	ON840011_Tom_NRB_IT	FM163373_Tom_NRB_SP	KY495608_Tom_NRB_CN	JF960236_Tom_NRB_CN	KU179512_Tom_NRB_US	KY250489_Tom_NRB_SA	OL471956_Tom_NRB_SI	OL471950_Tom_NRB_SI	KM365065_Tom_NRB_AU	KC261966_Let_NRB_SK	KC261972_Ste_NRB_SK	KC261975_Chr_NRB_SK	KM076652_Leo_NRB_SK	MN493847_Zin_NRB_CN	MN870630_Tob_NRB_CN	MT241884_Tro_NRB_CN	KU179514_Oci_NRB_US	MG593198_Dat_NRB_US	OL471962_Wee_NRB_SI	MG602672_Chr_NRB_ZW	MW854272_Tob_NRB_BG
PP622752_Tom_BL1_RB		99.351	96.075	98.785	96.761	91.632	97.215	95.801	95.761	97.444	97.444	96.921	95.582	95.791	97.654	91.587	97.486	97.486	91.344	91.782	91.822	97.319	95.825	97.067	97.13	95.951	97.382	97.425	97.486	91.444	92.053
PP622755_Tom_BL2_RB	99.351		96.138	98.974	96.865	91.736	97.278	95.906	95.866	97.549	97.591	97.026	95.687	95.896	97.759	91.732	97.591	97.591	91.468	91.886	91.925	97.424	95.929	97.172	97.235	96.055	97.444	97.571	97.591	91.568	92.199
PP632105_Tom_CA_RB	96.075	96.138		95.908	95.836	91.082	98.558	94.918	94.921	96.552	96.635	96.53	94.802	94.969	96.866	91.076	96.677	96.677	90.733	91.129	91.168	96.302	94.901	96.28	96.261	94.986	97.053	96.491	96.676	90.87	91.458
PP632102_Tom_MX_RB	98.785	98.974	95.908		96.595	91.715	97.048	95.697	95.698	97.277	97.319	96.837	95.54	95.666	97.486	91.649	97.319	97.319	91.344	91.844	91.884	97.193	95.762	96.963	97.005	95.846	97.109	97.341	97.318	91.444	92.053
OR166267_Tom_RB_IT	96.761	96.865	95.836	96.595		92.813	96.925	95.568	95.569	98.835	97.546	96.798	95.493	95.659	97.527	92.85	97.422	97.422	92.564	92.879	92.919	97.548	95.591	97.691	97.632	95.634	97.152	97.195	97.422	92.665	93.322
HM015520_Tom_RB_SP	91.632	91.736	91.082	91.715	92.813		91.946	91.896	91.775	92.15	91.964	91.713	92.152	92.172	92.191	96.81	92.067	92.067	97.164	98.758	98.799	91.756	91.756	92.295	92.336	91.978	91.901	92.152	92.065	96.396	97.941
OQ718496_Tom_RB_MX	97.215	97.278	98.558	97.048	96.925	91.946		95.822	95.825	97.673	97.694	97.61	95.771	95.938	97.883	91.983	97.778	97.778	91.596	92.034	92.074	97.339	95.805	97.38	97.319	95.89	98.113	97.528	97.778	91.734	92.348
HM581935_Tom_NRB_SK	95.801	95.906	94.918	95.697	95.568	91.896	95.822		99.227	96.239	96.302	95.737	95.342	95.509	96.323	91.748	96.239	96.281	91.691	91.982	92.021	95.947	99.165	96.344	96.03	98.998	96.092	96.221	96.238	91.582	92.297
KC261969_Tom_NRB_SK	95.761	95.866	94.921	95.698	95.569	91.775	95.825	99.227		96.241	96.303	95.718	95.406	95.531	96.325	91.73	96.199	96.241	91.488	91.964	92.004	95.99	99.311	96.387	96.074	98.936	96.032	96.306	96.198	91.503	92.175
ON840008_Tom_NRB_IT	97.444	97.549	96.552	97.277	98.835	92.15	97.673	96.239	96.241		98.238	97.483	96.208	96.375	98.218	92.187	98.154	98.154	91.922	92.238	92.277	98.281	96.262	98.426	98.324	96.347	97.882	97.883	98.154	92.002	92.657
ON840011_Tom_NRB_IT	97.444	97.591	96.635	97.319	97.546	91.964	97.694	96.302	96.303	98.238		97.525	96.208	96.417	98.239	92.022	98.154	98.154	91.779	92.113	92.153	97.82	96.325	97.818	97.737	96.368	97.861	98.008	98.154	91.898	92.449
FM163373_Tom_NRB_SP	96.921	97.026	96.53	96.837	96.798	91.713	97.61	95.737	95.718	97.483	97.525		95.538	95.664	97.673	91.731	97.651	97.651	91.385	91.782	91.822	97.191	95.759	97.231	97.129	95.784	97.693	97.4	97.651	91.587	92.237
KY495608_Tom_NRB_CN	95.582	95.687	94.802	95.54	95.493	92.152	95.771	95.342	95.406	96.208	96.208	95.538		99.455	96.188	92.086	96.104	96.104	91.592	92.217	92.257	95.832	95.386	95.978	95.833	95.408	95.936	96.231	96.103	91.715	92.429
JF960236_Tom_NRB_CN	95.791	95.896	94.969	95.666	95.659	92.172	95.938	95.509	95.531	96.375	96.417	95.664	99.455		96.397	92.086	96.313	96.313	91.696	92.279	92.319	95.999	95.553	96.104	96.001	95.575	96.083	96.399	96.313	91.798	92.492
KU179512_Tom_NRB_US	97.654	97.759	96.866	97.486	97.527	92.191	97.883	96.323	96.325	98.218	98.239	97.673	96.188	96.397		92.147	98.364	98.364	91.903	92.258	92.298	97.883	96.347	97.82	97.821	96.473	98.008	98.009	98.364	91.9	92.615
KY250489_Tom_NRB_SA	91.587	91.732	91.076	91.649	92.85	96.81	91.983	91.748	91.73	92.187	92.022	91.731	92.086	92.086	92.147		92.147	92.147	96.315	96.771	96.812	91.794	91.711	92.105	92.105	91.913	91.898	92.065	92.145	95.98	97.212
OL471956_Tom_NRB_SI	97.486	97.591	96.677	97.319	97.422	92.067	97.778	96.239	96.199	98.154	98.154	97.651	96.104	96.313	98.364	92.147		99.874	91.8	92.176	92.215	97.82	96.221	97.798	97.695	96.285	97.987	97.8	100	91.877	92.49
OL471950_Tom_NRB_SI	97.486	97.591	96.677	97.319	97.422	92.067	97.778	96.281	96.241	98.154	98.154	97.651	96.104	96.313	98.364	92.147	99.874		91.8	92.176	92.215	97.82	96.262	97.798	97.695	96.326	97.987	97.8	99.874	91.877	92.49
KM365065_Tom_NRB_AU	91.344	91.468	90.733	91.344	92.564	97.164	91.596	91.691	91.488	91.922	91.779	91.385	91.592	91.696	91.903	96.315	91.8	91.8		97.206	97.246	91.53	91.51	91.922	91.924	91.691	91.717	91.882	91.798	96.108	97.36
KC261966_Let_NRB_SK	91.782	91.886	91.129	91.844	92.879	98.758	92.034	91.982	91.964	92.238	92.113	91.782	92.217	92.279	92.258	96.771	92.176	92.176	97.206		99.917	91.865	91.904	92.32	92.403	92.126	92.01	92.341	92.174	96.419	97.984
KC261972_Ste_NRB_SK	91.822	91.925	91.168	91.884	92.919	98.799	92.074	92.021	92.004	92.277	92.153	91.822	92.257	92.319	92.298	96.812	92.215	92.215	97.246	99.917		91.905	91.944	92.36	92.443	92.166	92.05	92.381	92.214	96.46	98.025
KC261975_Chr_NRB_SK	97.319	97.424	96.302	97.193	97.548	91.756	97.339	95.947	95.99	98.281	97.82	97.191	95.832	95.999	97.883	91.794	97.82	97.82	91.53	91.865	91.905		96.012	97.883	97.988	96.055	97.547	97.612	97.819	91.629	92.199
KM076652_Leo_NRB_SK	95.825	95.929	94.901	95.762	95.591	91.756	95.805	99.165	99.311	96.262	96.325	95.759	95.386	95.553	96.347	91.711	96.221	96.262	91.51	91.904	91.944	96.012		96.367	96.053	98.853	96.053	96.327	96.22	91.567	92.177
MN493847_Zin_NRB_CN	97.067	97.172	96.28	96.963	97.691	92.295	97.38	96.344	96.387	98.426	97.818	97.231	95.978	96.104	97.82	92.105	97.798	97.798	91.922	92.32	92.36	97.883	96.367		98.889	96.535	97.484	97.673	97.797	91.877	92.615
MN870630_Tob_NRB_CN	97.13	97.235	96.261	97.005	97.632	92.336	97.319	96.03	96.074	98.324	97.737	97.129	95.833	96.001	97.821	92.105	97.695	97.695	91.924	92.403	92.443	97.988	96.053	98.889		96.18	97.464	97.508	97.694	92.002	92.615
MT241884_Tro_NRB_CN	95.951	96.055	94.986	95.846	95.634	91.978	95.89	98.998	98.936	96.347	96.368	95.784	95.408	95.575	96.473	91.913	96.285	96.326	91.691	92.126	92.166	96.055	98.853	96.535	96.18		96.18	96.37	96.284	91.687	92.421
KU179514_Oci_NRB_US	97.382	97.444	97.053	97.109	97.152	91.901	98.113	96.092	96.032	97.882	97.861	97.693	95.936	96.083	98.008	91.898	97.987	97.987	91.717	92.01	92.05	97.547	96.053	97.484	97.464	96.18		97.632	97.987	91.815	92.386
MG593198_Dat_NRB_US	97.425	97.571	96.491	97.341	97.195	92.152	97.528	96.221	96.306	97.883	98.008	97.4	96.231	96.399	98.009	92.065	97.8	97.8	91.882	92.341	92.381	97.612	96.327	97.673	97.508	96.37	97.632		97.799	91.881	92.677
OL471962_Wee_NRB_SI	97.486	97.591	96.676	97.318	97.422	92.065	97.778	96.238	96.198	98.154	98.154	97.651	96.103	96.313	98.364	92.145	100	99.874	91.798	92.174	92.214	97.819	96.22	97.797	97.694	96.284	97.987	97.799		91.876	92.49
MG602672_Chr_NRB_ZW	91.444	91.568	90.87	91.444	92.665	96.396	91.734	91.582	91.503	92.002	91.898	91.587	91.715	91.798	91.9	95.98	91.877	91.877	96.108	96.419	96.46	91.629	91.567	91.877	92.002	91.687	91.815	91.881	91.876		96.964
MW854272_Tob_NRB_BG	92.053	92.199	91.458	92.053	93.322	97.941	92.348	92.297	92.175	92.657	92.449	92.237	92.429	92.492	92.615	97.212	92.49	92.49	97.36	97.984	98.025	92.199	92.177	92.615	92.615	92.421	92.386	92.677	92.49	96.964
d. Tomato_S segment
	PP622753_Tom_BL1_RB	PP622756_Tom_BL2_RB	PP632106_Tom_CA_RB	PP632103_Tom_MX_RB	OR166266_Tom_RB_IT	KP008131_Tom_RB_SP	OQ718497_Tom_RB_MX	HM581936_Tom_NRB_SK	KC261970_Tom_NRB_SK	ON840009_Tom_NRB_IT	ON840012_Tom_NRB_IT	KP008129_Tom_NRB_SP	KY495612_Tom_NRB_CN	JF960235_Tom_NRB_CN	KU179513_Tom_NRB_US	KY250490_Tom_NRB_SA	OL471957_Tom_NRB_SI	OL471951_Tom_NRB_SI	KM365066_Tom_NRB_AU	KC261967_Let_NRB_SK	KC261973_Ste_NRB_SK	KC261976_Chr_NRB_SK	KM076653_Leo_NRB_SK	MN493848_Zin_NRB_CN	MN861979_Tob_NRB_CN	MT241885_Tro_NRB_CN	KU179515_Oci_NRB_US	MG593199_Dat_NRB_US	OL471963_Wee_NRB_SI	MG602673_Chr_NRB_ZW	MW854273_Tob_NRB_BG
PP622753_Tom_BL1_RB		98.331	95.557	98.94	97.643	92.975	96.995	93.221	93.322	96.896	96.793	97.438	92.761	92.855	97.202	93.473	97.1	97.202	92.54	93.479	93.112	91.303	93.322	97.539	96.907	97.573	96.145	92.308	97.1	93.183	93.311
PP622756_Tom_BL2_RB	98.331		94.891	97.888	97.139	92.977	96.425	93.159	93.226	96.328	96.361	97.072	92.697	92.857	96.769	93.342	96.667	96.769	92.474	93.416	93.147	91.303	93.226	96.935	96.673	97.037	95.616	92.083	96.667	92.764	92.955
PP632106_Tom_CA_RB	95.557	94.891		95.147	95.899	91.527	98.083	91.876	91.843	95.155	95.288	95.695	91.485	91.644	95.698	91.813	95.461	95.563	91.128	92	91.697	90.007	91.876	95.694	95.071	95.694	95.735	90.97	95.461	91.672	91.863
PP632103_Tom_MX_RB	98.94	97.888	95.147		97.301	92.571	96.482	93.054	93.121	96.521	96.452	97.096	92.46	92.62	96.998	93.135	96.793	96.861	92.231	93.076	92.742	91.005	93.02	97.095	96.567	97.232	95.637	91.91	96.793	92.749	92.908
OR166266_Tom_RB_IT	97.643	97.139	95.899	97.301		93.345	97.369	93.624	93.691	97.169	97.236	97.883	93.264	93.425	97.849	93.777	97.544	97.646	92.609	93.851	93.548	91.567	93.624	97.847	98.367	98.018	96.448	92.55	97.544	93.488	93.58
KP008131_Tom_RB_SP	92.975	92.977	91.527	92.571	93.345		92.874	95.332	95.332	92.579	92.612	93.345	95.037	95.2	93.018	96.057	92.682	92.783	94.29	99.089	98.718	93.252	95.265	93.109	93.553	93.21	93.318	94.256	92.682	96.945	96.972
OQ718497_Tom_RB_MX	96.995	96.425	98.083	96.482	97.369	92.874		93.255	93.289	96.692	96.826	97.03	92.795	92.955	97.235	93.27	96.998	97.1	92.403	93.313	93.011	91.366	93.322	97.063	96.568	97.097	97.495	92.215	96.998	93.018	93.21
HM581936_Tom_NRB_SK	93.221	93.159	91.876	93.054	93.624	95.332	93.255		99.294	92.692	92.692	93.423	97.582	97.748	93.362	94.56	93.061	93.097	96.245	95.769	95.532	95.002	99.193	93.255	93.767	93.49	93.729	97.004	93.061	95.438	94.874
KC261970_Tom_NRB_SK	93.322	93.226	91.843	93.121	93.691	95.332	93.289	99.294		92.759	92.759	93.557	97.449	97.614	93.298	94.627	93.063	93.164	96.074	95.769	95.467	94.904	99.125	93.356	93.867	93.591	93.763	96.739	93.063	95.372	94.874
ON840009_Tom_NRB_IT	96.896	96.328	95.155	96.521	97.169	92.579	96.692	92.692	92.759		99.044	96.794	92.529	92.462	97.85	92.939	98.805	98.907	91.83	93.085	92.85	91.071	92.792	96.793	96.369	96.895	95.845	91.753	98.805	92.824	92.85
ON840012_Tom_NRB_IT	96.793	96.361	95.288	96.452	97.236	92.612	96.826	92.692	92.759	99.044		96.794	92.661	92.594	97.952	92.973	98.941	99.044	91.793	93.118	92.951	91.005	92.792	96.793	96.504	96.895	95.777	91.72	98.941	92.757	92.848
KP008129_Tom_NRB_SP	97.438	97.072	95.695	97.096	97.883	93.345	97.03	93.423	93.557	96.794	96.794		93.029	93.257	97.374	93.744	97.101	97.203	92.506	93.851	93.548	91.435	93.456	98.393	97.01	98.769	96.146	92.483	97.101	93.452	93.546
KY495612_Tom_NRB_CN	92.761	92.697	91.485	92.46	93.264	95.037	92.795	97.582	97.449	92.529	92.661	93.029		99.294	93.099	94.295	92.764	92.898	96.382	95.372	95.205	94.707	97.382	92.929	93.373	93.097	93.202	96.507	92.764	95.077	94.645
JF960235_Tom_NRB_CN	92.855	92.857	91.644	92.62	93.425	95.2	92.955	97.748	97.614	92.462	92.594	93.257	99.294		93.032	94.525	92.764	92.898	96.447	95.535	95.3	94.674	97.547	93.09	93.534	93.257	93.362	96.671	92.764	95.206	94.807
KU179513_Tom_NRB_US	97.202	96.769	95.698	96.998	97.849	93.018	97.235	93.362	93.298	97.85	97.952	97.374	93.099	93.032		93.381	98.258	98.293	92.379	93.523	93.353	91.73	93.298	97.271	96.978	97.441	96.316	92.292	98.258	93.226	93.253
KY250490_Tom_NRB_SA	93.473	93.342	91.813	93.135	93.777	96.057	93.27	94.56	94.627	92.939	92.973	93.744	94.295	94.525	93.381		93.043	93.144	93.666	96.495	96.191	92.493	94.527	93.507	93.628	93.744	92.936	93.251	93.043	96.065	95.791
OL471957_Tom_NRB_SI	97.1	96.667	95.461	96.793	97.544	92.682	96.998	93.061	93.063	98.805	98.941	97.101	92.764	92.764	98.258	93.043		99.693	92.139	93.188	92.951	91.499	93.097	97.1	96.808	97.202	96.014	92.024	100	92.891	92.984
OL471951_Tom_NRB_SI	97.202	96.769	95.563	96.861	97.646	92.783	97.1	93.097	93.164	98.907	99.044	97.203	92.898	92.898	98.293	93.144	99.693		92.207	93.289	92.987	91.468	93.197	97.202	96.843	97.305	96.115	92.125	99.693	92.927	93.15
KM365066_Tom_NRB_AU	92.54	92.474	91.128	92.231	92.609	94.29	92.403	96.245	96.074	91.83	91.793	92.506	96.382	96.447	92.379	93.666	92.139	92.207		94.634	94.324	94.138	96.247	92.54	92.791	92.437	92.82	95.072	92.139	94.366	94.164
KC261967_Let_NRB_SK	93.479	93.416	92	93.076	93.851	99.089	93.313	95.769	95.769	93.085	93.118	93.851	95.372	95.535	93.523	96.495	93.188	93.289	94.634		99.392	93.649	95.702	93.481	93.991	93.716	93.756	94.724	93.188	97.415	97.577
KC261973_Ste_NRB_SK	93.112	93.147	91.697	92.742	93.548	98.718	93.011	95.532	95.467	92.85	92.951	93.548	95.205	95.3	93.353	96.191	92.951	92.987	94.324	99.392		93.415	95.4	93.179	93.756	93.414	93.454	94.357	92.951	97.112	97.241
KC261976_Chr_NRB_SK	91.303	91.303	90.007	91.005	91.567	93.252	91.366	95.002	94.904	91.071	91.005	91.435	94.707	94.674	91.73	92.493	91.499	91.468	94.138	93.649	93.415		95.5	91.237	91.84	91.336	91.868	93.779	91.499	93.717	92.874
KM076653_Leo_NRB_SK	93.322	93.226	91.876	93.02	93.624	95.265	93.322	99.193	99.125	92.792	92.792	93.456	97.382	97.547	93.298	94.527	93.097	93.197	96.247	95.702	95.4	95.5		93.356	93.8	93.523	93.796	96.605	93.097	95.372	94.774
MN493848_Zin_NRB_CN	97.539	96.935	95.694	97.095	97.847	93.109	97.063	93.255	93.356	96.793	96.793	98.393	92.929	93.09	97.271	93.507	97.1	97.202	92.54	93.481	93.179	91.237	93.356		97.042	98.803	96.145	92.248	97.1	93.152	93.311
MN861979_Tob_NRB_CN	96.907	96.673	95.071	96.567	98.367	93.553	96.568	93.767	93.867	96.369	96.504	97.01	93.373	93.534	96.978	93.628	96.808	96.843	92.791	93.991	93.756	91.84	93.8	97.042		97.144	95.659	92.692	96.808	93.213	93.269
MT241885_Tro_NRB_CN	97.573	97.037	95.694	97.232	98.018	93.21	97.097	93.49	93.591	96.895	96.895	98.769	93.097	93.257	97.441	93.744	97.202	97.305	92.437	93.716	93.414	91.336	93.523	98.803	97.144		96.179	92.483	97.202	93.387	93.58
KU179515_Oci_NRB_US	96.145	95.616	95.735	95.637	96.448	93.318	97.495	93.729	93.763	95.845	95.777	96.146	93.202	93.362	96.316	92.936	96.014	96.115	92.82	93.756	93.454	91.868	93.796	96.145	95.659	96.179		92.653	96.014	93.523	93.687
MG593199_Dat_NRB_US	92.308	92.083	90.97	91.91	92.55	94.256	92.215	97.004	96.739	91.753	91.72	92.483	96.507	96.671	92.292	93.251	92.024	92.125	95.072	94.724	94.357	93.779	96.605	92.248	92.692	92.483	92.653		92.024	94.331	93.668
OL471963_Wee_NRB_SI	97.1	96.667	95.461	96.793	97.544	92.682	96.998	93.061	93.063	98.805	98.941	97.101	92.764	92.764	98.258	93.043	100	99.693	92.139	93.188	92.951	91.499	93.097	97.1	96.808	97.202	96.014	92.024		92.891	92.984
MG602673_Chr_NRB_ZW	93.183	92.764	91.672	92.749	93.488	96.945	93.018	95.438	95.372	92.824	92.757	93.452	95.077	95.206	93.226	96.065	92.891	92.927	94.366	97.415	97.112	93.717	95.372	93.152	93.213	93.387	93.523	94.331	92.891		97.246
MW854273_Tob_NRB_BG	93.311	92.955	91.863	92.908	93.58	96.972	93.21	94.874	94.874	92.85	92.848	93.546	94.645	94.807	93.253	95.791	92.984	93.15	94.164	97.577	97.241	92.874	94.774	93.311	93.269	93.58	93.687	93.668	92.984	97.246
e. Tomato_RdRP
	PP622751.1_Tom_BL1_RB_RdRP	PP622754.1_Tom_BL2_RB_RdRP	PP632104.1_Tom_CA_RB_RdRP	PP622757.1_Tom_MX_RB_RdRP	OR166268_Tom_RB_IT_RdRP	KP008130_Tom_RB_SP_RdRP	OQ718495_Tom_RB_MX_RdRP	HM581934_Tom_NRB_SK_RdRP	KC261968_Tom_NRB_SK_RdRP	ON840007_Tom_NRB_IT_RdRP	ON840010_Tom_NRB_IT_RdRP	KP008128_Tom_NRB_SP_RdRP	MF590700_Tom_NRB_CN_RdRP	JF960237_Tom_NRB_CN_RdRP	MH745369_Tom_NRB_US_RdRP	KY250488_Tom_NRB_SA_RdRP	OL471955_Tom_NRB_SI_RdRP	OL471949_Tom_NRB_SI_RdRP	KM365064_Tom_NRB_AU_RdRP	KC261965_Let_NRB_SK_RdRP	KC261971_Ste_NRB_SK_RdRP	KC261974_Chr_NRB_SK_RdRP	KM076651_Leo_NRB_SK_RdRP	MN493846_Zin_NRB_CN_RdRP	MN870626_Tob_NRB_CN_RdRP	MT241883_Tro_NRB_CN_RdRP	MH745370_Oci_NRB_US_RdRP	MG593197_34_8673_Dat_NRB_US_RdRP	OL471961_Wee_NRB_SI_RdRP	MG602671_Chr_NRB_ZW_RdRP	MW854271_Tob_NRB_BG_RdRP
PP622751.1_Tom_BL1_RB_RdRP		99.329	94.942	99.039	97.87	97.789	93.171	97.199	97.176	97.28	97.5	97.755	95.347	95.256	97.639	96.331	97.326	97.35	97.228	97.5	97.569	93.461	95.914	95.428	95.486	97.488	97.176	95.243	97.326	96.181	98.032
PP622754.1_Tom_BL2_RB_RdRP	99.329		95.081	99.225	98.032	97.975	93.31	97.338	97.315	97.419	97.685	97.94	95.556	95.488	97.708	96.47	97.488	97.512	97.367	97.674	97.72	93.646	96.053	95.637	95.694	97.65	97.315	95.405	97.488	96.343	98.102
PP632104.1_Tom_CA_RB_RdRP	94.942	95.081		94.757	95.347	95.451	97.662	94.792	94.792	95.012	94.988	95.313	94.479	94.389	95.104	94.78	95.058	95.058	94.878	94.977	95.046	96.505	95.741	94.491	94.572	95.093	94.78	94.271	95.058	94.595	95.162
PP622757.1_Tom_MX_RB_RdRP	99.039	99.225	94.757		97.72	97.639	93.009	97.072	97.049	97.13	97.35	97.604	95.243	95.152	97.465	96.169	97.153	97.176	97.101	97.338	97.384	93.299	95.764	95.324	95.382	97.338	97.049	95.139	97.153	96.007	97.847
OR166268_Tom_RB_IT_RdRP	97.87	98.032	95.347	97.72		99.572	93.785	98.333	98.287	97.998	99.363	99.606	96.053	95.962	98.449	97.118	98.067	98.09	97.899	99.294	99.329	94.063	96.875	96.111	96.157	99.236	97.998	95.891	98.067	96.91	98.438
KP008130_Tom_RB_SP_RdRP	97.789	97.975	95.451	97.639	99.572		93.808	98.275	98.229	97.986	99.19	99.525	96.007	95.939	98.38	97.049	98.056	98.079	97.818	99.19	99.201	94.167	96.84	96.088	96.111	99.063	97.917	95.845	98.056	96.898	98.333
OQ718495_Tom_RB_MX_RdRP	93.171	93.31	97.662	93.009	93.785	93.808		93.264	93.241	93.449	93.391	93.808	93.426	93.359	93.565	93.611	93.461	93.507	93.374	93.38	93.449	97.014	94.468	93.449	93.53	93.461	93.287	93.31	93.461	93.322	93.669
HM581934_Tom_NRB_SK_RdRP	97.199	97.338	94.792	97.072	98.333	98.275	93.264		99.444	97.269	97.951	98.264	95.567	95.476	97.616	96.4	97.315	97.338	97.17	97.975	97.998	93.611	97.674	95.66	95.694	97.87	97.234	95.451	97.315	96.331	97.616
KC261968_Tom_NRB_SK_RdRP	97.176	97.315	94.792	97.049	98.287	98.229	93.241	99.444		97.245	97.905	98.218	95.544	95.465	97.546	96.366	97.292	97.315	97.078	97.928	97.951	93.576	97.627	95.637	95.671	97.824	97.211	95.498	97.292	96.343	97.593
ON840007_Tom_NRB_IT_RdRP	97.28	97.419	95.012	97.13	97.998	97.986	93.449	97.269	97.245		97.662	97.928	95.683	95.569	97.789	96.736	99.63	99.63	97.402	97.743	97.743	93.773	95.995	95.718	95.787	97.627	97.407	95.532	99.63	96.632	97.882
ON840010_Tom_NRB_IT_RdRP	97.5	97.685	94.988	97.35	99.363	99.19	93.391	97.951	97.905	97.662		99.201	95.718	95.627	98.032	96.748	97.731	97.755	97.541	98.889	98.924	93.75	96.539	95.775	95.822	98.808	97.593	95.579	97.731	96.597	98.044
KP008128_Tom_NRB_SP_RdRP	97.755	97.94	95.313	97.604	99.606	99.525	93.808	98.264	98.218	97.928	99.201		96.065	96.008	98.345	97.06	98.021	98.044	97.83	99.248	99.259	94.109	96.806	96.123	96.169	99.097	97.928	95.938	98.021	96.875	98.322
MF590700_Tom_NRB_CN_RdRP	95.347	95.556	94.479	95.243	96.053	96.007	93.426	95.567	95.544	95.683	95.718	96.065		99.387	95.718	95.694	95.729	95.752	95.584	95.671	95.694	93.773	94.931	99.583	99.606	95.775	95.509	97.396	95.729	95.44	95.833
JF960237_Tom_NRB_CN_RdRP	95.256	95.488	94.389	95.152	95.962	95.939	93.359	95.476	95.465	95.569	95.627	96.008	99.387		95.603	95.58	95.661	95.684	95.493	95.65	95.65	93.694	94.874	99.433	99.456	95.638	95.418	97.246	95.661	95.337	95.742
MH745369_Tom_NRB_US_RdRP	97.639	97.708	95.104	97.465	98.449	98.38	93.565	97.616	97.546	97.789	98.032	98.345	95.718	95.603		96.829	97.859	97.882	97.841	98.067	98.067	93.9	96.25	95.799	95.845	98.056	97.94	95.579	97.859	96.586	98.113
KY250488_Tom_NRB_SA_RdRP	96.331	96.47	94.78	96.169	97.118	97.049	93.611	96.4	96.366	96.736	96.748	97.06	95.694	95.58	96.829		96.806	96.852	96.568	96.782	96.725	93.924	95.498	95.775	95.775	96.84	96.447	95.556	96.806	97.292	96.887
OL471955_Tom_NRB_SI_RdRP	97.326	97.488	95.058	97.153	98.067	98.056	93.461	97.315	97.292	99.63	97.731	98.021	95.729	95.661	97.859	96.806		99.838	97.471	97.836	97.813	93.808	96.053	95.787	95.856	97.674	97.477	95.567	100	96.632	97.928
OL471949_Tom_NRB_SI_RdRP	97.35	97.512	95.058	97.176	98.09	98.079	93.507	97.338	97.315	99.63	97.755	98.044	95.752	95.684	97.882	96.852	99.838		97.494	97.859	97.836	93.831	96.053	95.81	95.88	97.697	97.523	95.59	99.838	96.655	97.975
KM365064_Tom_NRB_AU_RdRP	97.228	97.367	94.878	97.101	97.899	97.818	93.374	97.17	97.078	97.402	97.541	97.83	95.584	95.493	97.841	96.568	97.471	97.494		97.483	97.529	93.721	95.897	95.596	95.642	97.506	97.436	95.561	97.471	96.325	97.749
KC261965_Let_NRB_SK_RdRP	97.5	97.674	94.977	97.338	99.294	99.19	93.38	97.975	97.928	97.743	98.889	99.248	95.671	95.65	98.067	96.782	97.836	97.859	97.483		99.664	93.704	96.481	95.752	95.775	98.785	97.627	95.544	97.836	96.609	98.067
KC261971_Ste_NRB_SK_RdRP	97.569	97.72	95.046	97.384	99.329	99.201	93.449	97.998	97.951	97.743	98.924	99.259	95.694	95.65	98.067	96.725	97.813	97.836	97.529	99.664		93.819	96.505	95.752	95.799	98.819	97.65	95.567	97.813	96.644	98.09
KC261974_Chr_NRB_SK_RdRP	93.461	93.646	96.505	93.299	94.063	94.167	97.014	93.611	93.576	93.773	93.75	94.109	93.773	93.694	93.9	93.924	93.808	93.831	93.721	93.704	93.819		95.579	93.785	93.877	93.796	93.565	93.715	93.808	93.704	94.016
KM076651_Leo_NRB_SK_RdRP	95.914	96.053	95.741	95.764	96.875	96.84	94.468	97.674	97.627	95.995	96.539	96.806	94.931	94.874	96.25	95.498	96.053	96.053	95.897	96.481	96.505	95.579		94.988	95.069	96.493	95.984	94.861	96.053	95.556	96.354
MN493846_Zin_NRB_CN_RdRP	95.428	95.637	94.491	95.324	96.111	96.088	93.449	95.66	95.637	95.718	95.775	96.123	99.583	99.433	95.799	95.775	95.787	95.81	95.596	95.752	95.752	93.785	94.988		99.676	95.787	95.567	97.396	95.787	95.486	95.891
MN870626_Tob_NRB_CN_RdRP	95.486	95.694	94.572	95.382	96.157	96.111	93.53	95.694	95.671	95.787	95.822	96.169	99.606	99.456	95.845	95.775	95.856	95.88	95.642	95.775	95.799	93.877	95.069	99.676		95.833	95.613	97.442	95.856	95.532	95.949
MT241883_Tro_NRB_CN_RdRP	97.488	97.65	95.093	97.338	99.236	99.063	93.461	97.87	97.824	97.627	98.808	99.097	95.775	95.638	98.056	96.84	97.674	97.697	97.506	98.785	98.819	93.796	96.493	95.787	95.833		97.627	95.602	97.674	96.644	98.021
MH745370_Oci_NRB_US_RdRP	97.176	97.315	94.78	97.049	97.998	97.917	93.287	97.234	97.211	97.407	97.593	97.928	95.509	95.418	97.94	96.447	97.477	97.523	97.436	97.627	97.65	93.565	95.984	95.567	95.613	97.627		95.347	97.477	96.285	97.708
MG593197_Dat_NRB_US_RdRP	95.243	95.405	94.271	95.139	95.891	95.845	93.31	95.451	95.498	95.532	95.579	95.938	97.396	97.246	95.579	95.556	95.567	95.59	95.561	95.544	95.567	93.715	94.861	97.396	97.442	95.602	95.347		95.567	95.336	95.706
OL471961_Wee_NRB_SI_RdRP	97.326	97.488	95.058	97.153	98.067	98.056	93.461	97.315	97.292	99.63	97.731	98.021	95.729	95.661	97.859	96.806	100	99.838	97.471	97.836	97.813	93.808	96.053	95.787	95.856	97.674	97.477	95.567		96.632	97.928
MG602671_Chr_NRB_ZW_RdRP	96.181	96.343	94.595	96.007	96.91	96.898	93.322	96.331	96.343	96.632	96.597	96.875	95.44	95.337	96.586	97.292	96.632	96.655	96.325	96.609	96.644	93.704	95.556	95.486	95.532	96.644	96.285	95.336	96.632		96.713
MW854271_Tob_NRB_BG_RdRP	98.032	98.102	95.162	97.847	98.438	98.333	93.669	97.616	97.593	97.882	98.044	98.322	95.833	95.742	98.113	96.887	97.928	97.975	97.749	98.067	98.09	94.016	96.354	95.891	95.949	98.021	97.708	95.706	97.928	96.713
f. Tomato_GnGc
	PP622752_Tom_BL1_RB_GnGc	PP622755_Tom_BL2_RB_GnGc	PP632105_Tom_CA_RB_GnGc	PP632102_Tom_MX_RB_GnGc	OR166267_Tom_RB_IT_GnGc	HM015520_Tom_RB_SP_GnGc	OQ718496_Tom_RB_MX_GnGc	HM581935_Tom_NRB_SK_GnGc	KC261969_Tom_NRB_SK_GnGc	ON840008_Tom_NRB_IT_GnGc	ON840011_Tom_NRB_IT_GnGc	FM163373_Tom_NRB_SP_GnGc	KY495608_Tom_NRB_CN_GnGc	JF960236_Tom_NRB_CN_GnGc	KU179512_Tom_NRB_US_GnGc	KY250489_Tom_NRB_SA_GnGc	OL471956_Tom_NRB_SI_GnGc	OL471950_Tom_NRB_SI_GnGc	KM365065_Tom_NRB_AU_GnGc	KC261966_Let_NRB_SK_GnGc	KC261972_Ste_NRB_SK_GnGc	KC261975_Chr_NRB_SK_GnGc	KM076652_Leo_NRB_SK_GnGc	MN493847_Zin_NRB_CN_GnGc	MN870630_Tob_NRB_CN_GnGc	MT241884_Tro_NRB_CN_GnGc	KU179514_Oci_NRB_US_GnGc	MG593198_Dat_NRB_US_GnGc	OL471962_Wee_NRB_SI_GnGc	MG602672_Chr_NRB_ZW_GnGc	MW854272_Tob_NRB_BG_GnGc
PP622752_Tom_BL1_RB_GnGc		99.354	97.066	98.621	97.858	93.075	97.418	96.156	96.156	97.682	97.623	97.359	95.863	96.127	97.653	93.104	97.594	97.653	92.899	93.222	93.251	97.212	96.273	97.154	97.154	96.42	97.3	97.623	97.594	92.782	93.633
PP622755_Tom_BL2_RB_GnGc	99.354		97.124	98.856	97.975	93.192	97.477	96.273	96.273	97.799	97.741	97.477	95.98	96.244	97.77	93.222	97.711	97.77	93.046	93.339	93.369	97.33	96.391	97.271	97.271	96.538	97.359	97.799	97.711	92.928	93.809
PP632105_Tom_CA_RB_GnGc	97.066	97.124		96.743	97.741	93.31	99.472	96.068	96.127	97.623	97.623	97.711	95.921	96.185	97.594	93.369	97.594	97.653	93.163	93.339	93.369	97.066	96.185	97.154	97.066	96.332	97.887	97.506	97.594	93.046	93.867
PP632102_Tom_MX_RB_GnGc	98.621	98.856	96.743		97.594	93.104	97.095	95.98	95.98	97.418	97.418	97.154	95.716	95.921	97.388	93.163	97.33	97.388	92.87	93.222	93.251	96.948	96.097	96.919	96.89	96.244	96.89	97.418	97.33	92.752	93.603
OR166267_Tom_RB_IT_GnGc	97.858	97.975	97.741	97.594		93.838	98.093	96.978	97.036	99.765	98.592	98.21	96.772	96.978	98.474	93.955	98.474	98.533	93.691	93.985	94.014	98.621	97.095	98.562	98.709	97.242	98.034	98.357	98.474	93.633	94.513
HM015520_Tom_RB_SP_GnGc	93.075	93.192	93.31	93.104	93.838		93.486	93.427	93.222	93.721	93.603	93.457	93.75	93.838	93.603	97.212	93.691	93.75	97.565	98.914	98.944	93.192	93.339	93.809	93.75	93.339	93.251	93.809	93.691	96.831	98.269
OQ718496_Tom_RB_MX_GnGc	97.418	97.477	99.472	97.095	98.093	93.486		96.362	96.42	97.975	97.946	98.063	96.215	96.479	97.946	93.603	97.946	98.005	93.339	93.574	93.603	97.359	96.479	97.506	97.418	96.626	98.181	97.858	97.946	93.281	94.102
HM581935_Tom_NRB_SK_GnGc	96.156	96.273	96.068	95.98	96.978	93.427	96.362		99.208	96.86	96.89	96.45	95.951	96.156	96.655	93.369	96.684	96.743	93.281	93.427	93.457	96.303	99.384	97.066	96.391	99.12	96.362	96.802	96.684	93.075	93.926
KC261969_Tom_NRB_SK_GnGc	96.156	96.273	96.127	95.98	97.036	93.222	96.42	99.208		96.919	96.948	96.479	96.039	96.244	96.714	93.339	96.684	96.743	93.016	93.369	93.398	96.362	99.531	97.124	96.45	99.09	96.391	96.919	96.684	92.987	93.779
ON840008_Tom_NRB_IT_GnGc	97.682	97.799	97.623	97.418	99.765	93.721	97.975	96.86	96.919		98.415	97.975	96.655	96.86	98.298	93.838	98.298	98.357	93.574	93.867	93.897	98.445	96.978	98.445	98.533	97.124	97.917	98.181	98.298	93.574	94.396
ON840011_Tom_NRB_IT_GnGc	97.623	97.741	97.623	97.418	98.592	93.603	97.946	96.89	96.948	98.415		97.946	96.596	96.86	98.327	93.691	98.298	98.357	93.545	93.75	93.779	97.917	97.007	97.829	97.887	97.095	97.829	98.181	98.298	93.486	94.249
FM163373_Tom_NRB_SP_GnGc	97.359	97.477	97.711	97.154	98.21	93.457	98.063	96.45	96.479	97.975	97.946		96.215	96.42	97.975	93.633	98.063	98.122	93.339	93.545	93.574	97.477	96.538	97.565	97.506	96.684	97.975	97.858	98.063	93.31	94.073
KY495608_Tom_NRB_CN_GnGc	95.863	95.98	95.921	95.716	96.772	93.75	96.215	95.951	96.039	96.655	96.596	96.215		99.56	96.391	93.838	96.479	96.538	93.281	93.779	93.809	96.068	96.039	96.332	96.097	96.097	96.127	96.714	96.479	93.163	94.19
JF960236_Tom_NRB_CN_GnGc	96.127	96.244	96.185	95.921	96.978	93.838	96.479	96.156	96.244	96.86	96.86	96.42	99.56		96.655	93.867	96.743	96.802	93.427	93.926	93.955	96.332	96.244	96.538	96.362	96.303	96.303	96.978	96.743	93.251	94.278
KU179512_Tom_NRB_US_GnGc	97.653	97.77	97.594	97.388	98.474	93.603	97.946	96.655	96.714	98.298	98.327	97.975	96.391	96.655		93.662	98.298	98.357	93.427	93.691	93.721	97.799	96.772	97.799	97.799	96.919	97.77	98.093	98.298	93.281	94.219
KY250489_Tom_NRB_SA_GnGc	93.104	93.222	93.369	93.163	93.955	97.212	93.603	93.369	93.339	93.838	93.691	93.633	93.838	93.867	93.662		93.867	93.926	97.007	97.183	97.212	93.369	93.457	93.721	93.603	93.398	93.369	93.867	93.867	96.508	97.653
OL471956_Tom_NRB_SI_GnGc	97.594	97.711	97.594	97.33	98.474	93.691	97.946	96.684	96.684	98.298	98.298	98.063	96.479	96.743	98.298	93.867		99.883	93.457	93.779	93.809	97.77	96.743	97.829	97.77	96.86	97.887	98.034	100	93.369	94.249
OL471950_Tom_NRB_SI_GnGc	97.653	97.77	97.653	97.388	98.533	93.75	98.005	96.743	96.743	98.357	98.357	98.122	96.538	96.802	98.357	93.926	99.883		93.515	93.838	93.867	97.829	96.802	97.887	97.829	96.919	97.946	98.093	99.883	93.427	94.308
KM365065_Tom_NRB_AU_GnGc	92.899	93.046	93.163	92.87	93.691	97.565	93.339	93.281	93.016	93.574	93.545	93.339	93.281	93.427	93.427	97.007	93.457	93.515		97.477	97.506	93.075	93.134	93.515	93.486	93.075	93.251	93.633	93.457	96.743	97.946
KC261966_Let_NRB_SK_GnGc	93.222	93.339	93.339	93.222	93.985	98.914	93.574	93.427	93.369	93.867	93.75	93.545	93.779	93.926	93.691	97.183	93.779	93.838	97.477		99.912	93.281	93.427	93.838	93.838	93.427	93.339	93.897	93.779	96.831	98.239
KC261972_Ste_NRB_SK_GnGc	93.251	93.369	93.369	93.251	94.014	98.944	93.603	93.457	93.398	93.897	93.779	93.574	93.809	93.955	93.721	97.212	93.809	93.867	97.506	99.912		93.31	93.457	93.867	93.867	93.457	93.369	93.926	93.809	96.86	98.269
KC261975_Chr_NRB_SK_GnGc	97.212	97.33	97.066	96.948	98.621	93.192	97.359	96.303	96.362	98.445	97.917	97.477	96.068	96.332	97.799	93.369	97.77	97.829	93.075	93.281	93.31		96.479	97.829	97.975	96.567	97.3	97.682	97.77	93.104	93.809
KM076652_Leo_NRB_SK_GnGc	96.273	96.391	96.185	96.097	97.095	93.339	96.479	99.384	99.531	96.978	97.007	96.538	96.039	96.244	96.772	93.457	96.743	96.802	93.134	93.427	93.457	96.479		97.183	96.508	99.208	96.45	97.036	96.743	93.163	93.897
MN493847_Zin_NRB_CN_GnGc	97.154	97.271	97.154	96.919	98.562	93.809	97.506	97.066	97.124	98.445	97.829	97.565	96.332	96.538	97.799	93.721	97.829	97.887	93.515	93.838	93.867	97.829	97.183		98.914	97.388	97.33	97.77	97.829	93.339	94.337
MN870630_Tob_NRB_CN_GnGc	97.154	97.271	97.066	96.89	98.709	93.75	97.418	96.391	96.45	98.533	97.887	97.506	96.097	96.362	97.799	93.603	97.77	97.829	93.486	93.838	93.867	97.975	96.508	98.914		96.655	97.3	97.711	97.77	93.339	94.219
MT241884_Tro_NRB_CN_GnGc	96.42	96.538	96.332	96.244	97.242	93.339	96.626	99.12	99.09	97.124	97.095	96.684	96.097	96.303	96.919	93.398	96.86	96.919	93.075	93.427	93.457	96.567	99.208	97.388	96.655		96.626	97.066	96.86	93.104	93.897
KU179514_Oci_NRB_US_GnGc	97.3	97.359	97.887	96.89	98.034	93.251	98.181	96.362	96.391	97.917	97.829	97.975	96.127	96.303	97.77	93.369	97.887	97.946	93.251	93.339	93.369	97.3	96.45	97.33	97.3	96.626		97.653	97.887	93.163	93.955
MG593198_Dat_NRB_US_GnGc	97.623	97.799	97.506	97.418	98.357	93.809	97.858	96.802	96.919	98.181	98.181	97.858	96.714	96.978	98.093	93.867	98.034	98.093	93.633	93.897	93.926	97.682	97.036	97.77	97.711	97.066	97.653		98.034	93.574	94.425
OL471962_Wee_NRB_SI_GnGc	97.594	97.711	97.594	97.33	98.474	93.691	97.946	96.684	96.684	98.298	98.298	98.063	96.479	96.743	98.298	93.867	100	99.883	93.457	93.779	93.809	97.77	96.743	97.829	97.77	96.86	97.887	98.034		93.369	94.249
MG602672_Chr_NRB_ZW_GnGc	92.782	92.928	93.046	92.752	93.633	96.831	93.281	93.075	92.987	93.574	93.486	93.31	93.163	93.251	93.281	96.508	93.369	93.427	96.743	96.831	96.86	93.104	93.163	93.339	93.339	93.104	93.163	93.574	93.369		97.506
MW854272_Tob_NRB_BG_GnGc	93.633	93.809	93.867	93.603	94.513	98.269	94.102	93.926	93.779	94.396	94.249	94.073	94.19	94.278	94.219	97.653	94.249	94.308	97.946	98.239	98.269	93.809	93.897	94.337	94.219	93.897	93.955	94.425	94.249	97.506
g. Tomato_NSm
	PP622752_Tom_BL1_RB_NSm	PP622755_Tom_BL2_RB_NSm	PP632105_Tom_CA_RB_NSm	PP632102_Tom_MX_RB_NSm	OR166267_Tom_RB_IT_NSm	HM015520_Tom_RB_SP_NSm	OQ718496_Tom_RB_MX_NSm	HM581935_Tom_NRB_SK_NSm	KC261969_Tom_NRB_SK_NSm	ON840008_Tom_NRB_IT_NSm	ON840011_Tom_NRB_IT_NSm	FM163373_Tom_NRB_SP_NSm	KY495608_Tom_NRB_CN_NSm	JF960236_Tom_NRB_CN_NSm	KU179512_Tom_NRB_US_NSm	KY250489_Tom_NRB_SA_NSm	OL471956_Tom_NRB_SI_NSm	OL471950_Tom_NRB_SI_NSm	KM365065_Tom_NRB_AU_NSm	KC261966_Let_NRB_SK_NSm	KC261972_Ste_NRB_SK_NSm	KC261975_Chr_NRB_SK_NSm	KM076652_Leo_NRB_SK_NSm	MN493847_Zin_NRB_CN_NSm	MN870630_Tob_NRB_CN_NSm	MT241884_Tro_NRB_CN_NSm	KU179514_Oci_NRB_US_NSm	MG593198_Dat_NRB_US_NSm	OL471962_Wee_NRB_SI_NSm	MG602672_Chr_NRB_ZW_NSm	MW854272_Tob_NRB_BG_NSm
PP622752_Tom_BL1_RB_NSm		99.56	98.24	100	98.13	93.729	98.35	96.92	96.7	98.13	98.46	98.57	96.48	96.37	99.12	92.959	98.57	98.35	93.619	94.279	94.279	98.68	96.92	98.35	98.35	96.92	99.01	98.68	98.57	93.729	93.839
PP622755_Tom_BL2_RB_NSm	99.56		97.8	99.56	97.69	93.289	97.91	96.48	96.26	97.69	98.24	98.13	96.04	95.93	98.68	92.739	98.13	97.91	93.179	93.839	93.839	98.24	96.48	97.91	97.91	96.48	98.57	98.24	98.13	93.289	93.399
PP632105_Tom_CA_RB_NSm	98.24	97.8		98.24	98.02	93.729	99.89	96.37	96.15	98.02	98.24	98.35	96.26	96.15	98.9	93.289	98.13	97.91	93.509	94.169	94.169	98.02	96.37	98.35	98.35	96.37	98.79	98.24	98.13	93.619	93.949
PP632102_Tom_MX_RB_NSm	100	99.56	98.24		98.13	93.729	98.35	96.92	96.7	98.13	98.46	98.57	96.48	96.37	99.12	92.959	98.57	98.35	93.619	94.279	94.279	98.68	96.92	98.35	98.35	96.92	99.01	98.68	98.57	93.729	93.839
OR166267_Tom_RB_IT_NSm	98.13	97.69	98.02	98.13		93.839	98.13	96.7	96.48	99.56	98.13	98.24	96.26	96.15	98.79	92.959	98.02	97.8	93.619	94.059	94.059	98.35	96.7	98.9	98.9	96.48	98.68	98.13	98.02	93.509	93.949
HM015520_Tom_RB_SP_NSm	93.729	93.289	93.729	93.729	93.839		93.839	93.729	93.729	94.059	93.619	94.059	93.729	93.729	94.279	96.81	93.729	93.509	97.58	98.57	98.57	93.619	93.949	94.389	94.279	93.729	94.169	93.619	93.729	97.36	97.8
OQ718496_Tom_RB_MX_NSm	98.35	97.91	99.89	98.35	98.13	93.839		96.48	96.26	98.13	98.35	98.46	96.37	96.26	99.01	93.399	98.24	98.02	93.619	94.279	94.279	98.13	96.48	98.46	98.46	96.48	98.9	98.35	98.24	93.729	94.059
HM581935_Tom_NRB_SK_NSm	96.92	96.48	96.37	96.92	96.7	93.729	96.48		99.56	96.48	96.59	96.7	95.6	95.49	97.25	92.959	96.7	96.7	93.619	94.499	94.499	96.59	99.34	96.48	96.59	99.56	97.14	97.03	96.7	93.729	94.059
KC261969_Tom_NRB_SK_NSm	96.7	96.26	96.15	96.7	96.48	93.729	96.26	99.56		96.26	96.37	96.48	95.38	95.27	97.03	92.959	96.48	96.48	93.619	94.499	94.499	96.37	99.12	96.26	96.37	99.34	96.92	96.81	96.48	93.729	94.059
ON840008_Tom_NRB_IT_NSm	98.13	97.69	98.02	98.13	99.56	94.059	98.13	96.48	96.26		98.13	98.24	96.26	96.15	98.79	93.179	98.02	97.8	93.839	94.279	94.279	98.57	96.48	98.9	98.9	96.48	98.68	98.13	98.02	93.729	94.169
ON840011_Tom_NRB_IT_NSm	98.46	98.24	98.24	98.46	98.13	93.619	98.35	96.59	96.37	98.13		98.35	96.37	96.26	98.9	93.069	98.13	97.91	93.619	94.169	94.169	98.24	96.59	98.35	98.35	96.59	98.79	98.46	98.13	93.619	93.729
FM163373_Tom_NRB_SP_NSm	98.57	98.13	98.35	98.57	98.24	94.059	98.46	96.7	96.48	98.24	98.35		96.48	96.37	99.23	93.289	98.46	98.24	93.949	94.609	94.609	98.35	96.7	98.46	98.46	96.7	99.12	98.57	98.46	94.059	94.169
KY495608_Tom_NRB_CN_NSm	96.48	96.04	96.26	96.48	96.26	93.729	96.37	95.6	95.38	96.26	96.37	96.48		99.45	97.03	92.629	96.26	96.04	93.619	94.279	94.279	96.15	95.82	96.48	96.48	95.6	96.92	96.37	96.26	93.949	93.839
JF960236_Tom_NRB_CN_NSm	96.37	95.93	96.15	96.37	96.15	93.729	96.26	95.49	95.27	96.15	96.26	96.37	99.45		96.92	92.629	96.15	95.93	93.619	94.279	94.279	96.04	95.71	96.37	96.37	95.49	96.81	96.26	96.15	93.949	93.839
KU179512_Tom_NRB_US_NSm	99.12	98.68	98.9	99.12	98.79	94.279	99.01	97.25	97.03	98.79	98.9	99.23	97.03	96.92		93.509	99.01	98.79	94.169	94.829	94.829	98.9	97.25	99.01	99.01	97.25	99.67	99.12	99.01	94.279	94.389
KY250489_Tom_NRB_SA_NSm	92.959	92.739	93.289	92.959	92.959	96.81	93.399	92.959	92.959	93.179	93.069	93.289	92.629	92.629	93.509		92.959	92.739	96.04	97.14	97.14	92.959	92.959	93.619	93.509	92.959	93.619	92.849	92.959	96.15	96.92
OL471956_Tom_NRB_SI_NSm	98.57	98.13	98.13	98.57	98.02	93.729	98.24	96.7	96.48	98.02	98.13	98.46	96.26	96.15	99.01	92.959		99.78	93.619	94.279	94.279	98.35	96.7	98.24	98.35	96.7	98.9	98.35	100	93.729	93.839
OL471950_Tom_NRB_SI_NSm	98.35	97.91	97.91	98.35	97.8	93.509	98.02	96.7	96.48	97.8	97.91	98.24	96.04	95.93	98.79	92.739	99.78		93.399	94.059	94.059	98.13	96.7	98.02	98.13	96.7	98.68	98.13	99.78	93.509	93.619
KM365065_Tom_NRB_AU_NSm	93.619	93.179	93.509	93.619	93.619	97.58	93.619	93.619	93.619	93.839	93.619	93.949	93.619	93.619	94.169	96.04	93.619	93.399		97.8	97.8	93.509	93.839	94.059	93.949	93.619	94.059	93.509	93.619	96.59	97.03
KC261966_Let_NRB_SK_NSm	94.279	93.839	94.169	94.279	94.059	98.57	94.279	94.499	94.499	94.279	94.169	94.609	94.279	94.279	94.829	97.14	94.279	94.059	97.8		100	94.169	94.719	94.719	94.609	94.499	94.719	94.389	94.279	97.69	98.24
KC261972_Ste_NRB_SK_NSm	94.279	93.839	94.169	94.279	94.059	98.57	94.279	94.499	94.499	94.279	94.169	94.609	94.279	94.279	94.829	97.14	94.279	94.059	97.8	100		94.169	94.719	94.719	94.609	94.499	94.719	94.389	94.279	97.69	98.24
KC261975_Chr_NRB_SK_NSm	98.68	98.24	98.02	98.68	98.35	93.619	98.13	96.59	96.37	98.57	98.24	98.35	96.15	96.04	98.9	92.959	98.35	98.13	93.509	94.169	94.169		96.59	98.57	98.57	96.59	98.79	98.57	98.35	93.399	93.839
KM076652_Leo_NRB_SK_NSm	96.92	96.48	96.37	96.92	96.7	93.949	96.48	99.34	99.12	96.48	96.59	96.7	95.82	95.71	97.25	92.959	96.7	96.7	93.839	94.719	94.719	96.59		96.48	96.59	99.12	97.14	97.03	96.7	93.949	94.059
MN493847_Zin_NRB_CN_NSm	98.35	97.91	98.35	98.35	98.9	94.389	98.46	96.48	96.26	98.9	98.35	98.46	96.48	96.37	99.01	93.619	98.24	98.02	94.059	94.719	94.719	98.57	96.48		99.78	96.48	98.9	98.35	98.24	94.169	94.279
MN870630_Tob_NRB_CN_NSm	98.35	97.91	98.35	98.35	98.9	94.279	98.46	96.59	96.37	98.9	98.35	98.46	96.48	96.37	99.01	93.509	98.35	98.13	93.949	94.609	94.609	98.57	96.59	99.78		96.59	98.9	98.35	98.35	94.059	94.169
MT241884_Tro_NRB_CN_NSm	96.92	96.48	96.37	96.92	96.48	93.729	96.48	99.56	99.34	96.48	96.59	96.7	95.6	95.49	97.25	92.959	96.7	96.7	93.619	94.499	94.499	96.59	99.12	96.48	96.59		97.14	97.03	96.7	93.729	94.059
KU179514_Oci_NRB_US_NSm	99.01	98.57	98.79	99.01	98.68	94.169	98.9	97.14	96.92	98.68	98.79	99.12	96.92	96.81	99.67	93.619	98.9	98.68	94.059	94.719	94.719	98.79	97.14	98.9	98.9	97.14		99.01	98.9	94.169	94.279
MG593198_Dat_NRB_US_NSm	98.68	98.24	98.24	98.68	98.13	93.619	98.35	97.03	96.81	98.13	98.46	98.57	96.37	96.26	99.12	92.849	98.35	98.13	93.509	94.389	94.389	98.57	97.03	98.35	98.35	97.03	99.01		98.35	93.619	93.949
OL471962_Wee_NRB_SI_NSm	98.57	98.13	98.13	98.57	98.02	93.729	98.24	96.7	96.48	98.02	98.13	98.46	96.26	96.15	99.01	92.959	100	99.78	93.619	94.279	94.279	98.35	96.7	98.24	98.35	96.7	98.9	98.35		93.729	93.839
MG602672_Chr_NRB_ZW_NSm	93.729	93.289	93.619	93.729	93.509	97.36	93.729	93.729	93.729	93.729	93.619	94.059	93.949	93.949	94.279	96.15	93.729	93.509	96.59	97.69	97.69	93.399	93.949	94.169	94.059	93.729	94.169	93.619	93.729		97.58
MW854272_Tob_NRB_BG_NSm	93.839	93.399	93.949	93.839	93.949	97.8	94.059	94.059	94.059	94.169	93.729	94.169	93.839	93.839	94.389	96.92	93.839	93.619	97.03	98.24	98.24	93.839	94.059	94.279	94.169	94.059	94.279	93.949	93.839	97.58
h. Tomato_NSs
	PP622753_Tom_BL1_RB_NSs	PP622756_Tom_BL2_RB_NSs	PP632106_Tom_CA_RB_NSs	PP632103_Tom_MX_RB_NSs	OR166266_Tom_RB_IT_NSs	KP008131_Tom_RB_SP_NSs	OQ718497_Tom_RB_MX_NSs	HM581936_Tom_NRB_SK_NSs	KC261970_Tom_NRB_SK_NSs	ON840009_Tom_NRB_IT_NSs	ON840012_Tom_NRB_IT_NSs	KP008129_Tom_NRB_SP_NSs	KY495612_Tom_NRB_CN_NSs	JF960235_Tom_NRB_CN_NSs	KU179513_Tom_NRB_US_NSs	KY250490_Tom_NRB_SA_NSs	OL471957_Tom_NRB_SI_NSs	OL471951_Tom_NRB_SI_NSs	KM365066_Tom_NRB_AU_NSs	KC261967_Let_NRB_SK_NSs	KC261973_Ste_NRB_SK_NSs	KC261976_Chr_NRB_SK_NSs	KM076653_Leo_NRB_SK_NSs	MN493848_Zin_NRB_CN_NSs	MN861979_Tob_NRB_CN_NSs	MT241885_Tro_NRB_CN_NSs	KU179515_Oci_NRB_US_NSs	MG593199_Dat_NRB_US_NSs	OL471963_Wee_NRB_SI_NSs	MG602673_Chr_NRB_ZW_NSs	MW854273_Tob_NRB_BG_NSs
PP622753_Tom_BL1_RB_NSs		99.573	97.436	99.858	98.504	95.442	97.578	95.798	95.584	97.863	97.578	98.291	95.228	95.442	98.362	95.299	98.077	98.006	95.726	95.726	95.37	95.157	95.655	98.148	98.077	98.291	97.507	95.726	98.077	95.157	95.442
PP622756_Tom_BL2_RB_NSs	99.573		97.151	99.573	98.219	95.157	97.293	95.513	95.299	97.721	97.436	98.006	94.943	95.157	98.077	94.872	97.934	97.863	95.442	95.442	95.085	94.872	95.37	97.863	97.792	98.006	97.222	95.442	97.934	94.872	95.157
PP632106_Tom_CA_RB_NSs	97.436	97.151		97.436	97.792	94.658	99.858	95.085	94.872	97.222	97.08	97.436	94.658	94.872	97.65	94.658	97.436	97.365	94.658	95.085	94.729	94.516	94.943	97.436	97.365	97.436	98.006	95.157	97.436	94.516	94.801
PP632103_Tom_MX_RB_NSs	99.858	99.573	97.436		98.504	95.442	97.578	95.798	95.584	97.863	97.578	98.291	95.228	95.442	98.362	95.299	98.077	98.006	95.726	95.726	95.37	95.157	95.655	98.148	98.077	98.291	97.507	95.726	98.077	95.157	95.442
OR166266_Tom_RB_IT_NSs	98.504	98.219	97.792	98.504		95.655	97.934	96.011	95.798	97.792	97.65	98.504	95.584	95.798	98.575	95.37	98.148	98.077	95.513	96.083	95.726	95.37	95.869	98.362	98.86	98.504	97.863	96.083	98.148	95.37	95.655
KP008131_Tom_RB_SP_NSs	95.442	95.157	94.658	95.442	95.655		94.801	96.581	96.368	94.729	94.444	95.37	96.154	96.368	95.228	97.578	94.801	94.729	96.296	99.288	99.074	95.94	96.439	95.014	95.655	95.157	94.801	96.368	94.801	97.863	97.934
OQ718497_Tom_RB_MX_NSs	97.578	97.293	99.858	97.578	97.934	94.801		95.228	95.014	97.365	97.222	97.578	94.801	95.014	97.792	94.801	97.578	97.507	94.801	95.228	94.872	94.658	95.085	97.578	97.507	97.578	98.148	95.299	97.578	94.658	94.943
HM581936_Tom_NRB_SK_NSs	95.798	95.513	95.085	95.798	96.011	96.581	95.228		99.786	94.872	94.658	95.726	98.291	98.504	95.584	96.368	95.299	95.228	97.365	96.724	96.51	97.222	99.858	95.37	96.154	95.655	95.157	98.789	95.299	96.296	96.368
KC261970_Tom_NRB_SK_NSs	95.584	95.299	94.872	95.584	95.798	96.368	95.014	99.786		94.658	94.444	95.584	98.077	98.291	95.37	96.154	95.085	95.014	97.151	96.51	96.296	97.151	99.644	95.157	95.94	95.442	94.943	98.575	95.085	96.083	96.296
ON840009_Tom_NRB_IT_NSs	97.863	97.721	97.222	97.863	97.792	94.729	97.365	94.872	94.658		99.288	97.436	94.729	94.801	98.362	94.587	98.932	98.86	94.658	95.157	94.943	94.373	94.729	97.293	97.365	97.436	97.293	94.943	98.932	94.801	94.872
ON840012_Tom_NRB_IT_NSs	97.578	97.436	97.08	97.578	97.65	94.444	97.222	94.658	94.444	99.288		97.293	94.587	94.658	98.219	94.444	98.789	98.718	94.302	94.872	94.658	94.16	94.516	97.151	97.222	97.293	97.009	94.729	98.789	94.302	94.587
KP008129_Tom_NRB_SP_NSs	98.291	98.006	97.436	98.291	98.504	95.37	97.578	95.726	95.584	97.436	97.293		95.299	95.655	98.219	95.37	97.792	97.721	95.37	95.798	95.442	95.228	95.584	98.718	98.077	98.86	97.65	95.798	97.792	95.085	95.37
KY495612_Tom_NRB_CN_NSs	95.228	94.943	94.658	95.228	95.584	96.154	94.801	98.291	98.077	94.729	94.587	95.299		99.359	95.299	95.798	94.872	94.801	97.151	96.154	96.083	96.937	98.148	94.943	95.584	95.228	94.587	98.362	94.872	95.798	95.798
JF960235_Tom_NRB_CN_NSs	95.442	95.157	94.872	95.442	95.798	96.368	95.014	98.504	98.291	94.801	94.658	95.655	99.359		95.37	96.154	95.085	95.014	97.365	96.368	96.154	97.151	98.362	95.299	95.798	95.442	94.801	98.575	95.085	95.94	96.011
KU179513_Tom_NRB_US_NSs	98.362	98.077	97.65	98.362	98.575	95.228	97.792	95.584	95.37	98.362	98.219	98.219	95.299	95.37		95.085	98.575	98.504	95.228	95.655	95.442	95.228	95.442	98.077	98.148	98.219	97.721	95.655	98.575	95.085	95.37
KY250490_Tom_NRB_SA_NSs	95.299	94.872	94.658	95.299	95.37	97.578	94.801	96.368	96.154	94.587	94.444	95.37	95.798	96.154	95.085		94.658	94.587	95.94	97.721	97.507	95.513	96.225	95.014	95.513	95.157	94.658	96.154	94.658	97.151	97.293
OL471957_Tom_NRB_SI_NSs	98.077	97.934	97.436	98.077	98.148	94.801	97.578	95.299	95.085	98.932	98.789	97.792	94.872	95.085	98.575	94.658		99.786	94.943	95.228	94.872	94.801	95.157	97.65	97.721	97.792	97.365	95.37	100	94.658	94.943
OL471951_Tom_NRB_SI_NSs	98.006	97.863	97.365	98.006	98.077	94.729	97.507	95.228	95.014	98.86	98.718	97.721	94.801	95.014	98.504	94.587	99.786		94.872	95.157	94.801	94.729	95.085	97.578	97.65	97.721	97.293	95.299	99.786	94.587	94.872
KM365066_Tom_NRB_AU_NSs	95.726	95.442	94.658	95.726	95.513	96.296	94.801	97.365	97.151	94.658	94.302	95.37	97.151	97.365	95.228	95.94	94.943	94.872		96.368	96.154	97.08	97.222	95.085	95.655	95.157	94.658	97.293	94.943	95.94	96.154
KC261967_Let_NRB_SK_NSs	95.726	95.442	95.085	95.726	96.083	99.288	95.228	96.724	96.51	95.157	94.872	95.798	96.154	96.368	95.655	97.721	95.228	95.157	96.368		99.43	96.083	96.581	95.442	96.083	95.584	95.228	96.652	95.228	98.006	98.219
KC261973_Ste_NRB_SK_NSs	95.37	95.085	94.729	95.37	95.726	99.074	94.872	96.51	96.296	94.943	94.658	95.442	96.083	96.154	95.442	97.507	94.872	94.801	96.154	99.43		95.869	96.368	95.085	95.726	95.228	94.872	96.439	94.872	97.792	98.077
KC261976_Chr_NRB_SK_NSs	95.157	94.872	94.516	95.157	95.37	95.94	94.658	97.222	97.151	94.373	94.16	95.228	96.937	97.151	95.228	95.513	94.801	94.729	97.08	96.083	95.869		97.222	94.872	95.513	95.014	94.516	97.151	94.801	95.798	95.869
KM076653_Leo_NRB_SK_NSs	95.655	95.37	94.943	95.655	95.869	96.439	95.085	99.858	99.644	94.729	94.516	95.584	98.148	98.362	95.442	96.225	95.157	95.085	97.222	96.581	96.368	97.222		95.228	96.011	95.513	95.014	98.647	95.157	96.296	96.225
MN493848_Zin_NRB_CN_NSs	98.148	97.863	97.436	98.148	98.362	95.014	97.578	95.37	95.157	97.293	97.151	98.718	94.943	95.299	98.077	95.014	97.65	97.578	95.085	95.442	95.085	94.872	95.228		97.934	98.86	97.507	95.442	97.65	94.872	95.157
MN861979_Tob_NRB_CN_NSs	98.077	97.792	97.365	98.077	98.86	95.655	97.507	96.154	95.94	97.365	97.222	98.077	95.584	95.798	98.148	95.513	97.721	97.65	95.655	96.083	95.726	95.513	96.011	97.934		98.077	97.436	96.083	97.721	95.513	95.798
MT241885_Tro_NRB_CN_NSs	98.291	98.006	97.436	98.291	98.504	95.157	97.578	95.655	95.442	97.436	97.293	98.86	95.228	95.442	98.219	95.157	97.792	97.721	95.157	95.584	95.228	95.014	95.513	98.86	98.077		97.507	95.726	97.792	95.014	95.299
KU179515_Oci_NRB_US_NSs	97.507	97.222	98.006	97.507	97.863	94.801	98.148	95.157	94.943	97.293	97.009	97.65	94.587	94.801	97.721	94.658	97.365	97.293	94.658	95.228	94.872	94.516	95.014	97.507	97.436	97.507		95.085	97.365	94.658	94.943
MG593199_Dat_NRB_US_NSs	95.726	95.442	95.157	95.726	96.083	96.368	95.299	98.789	98.575	94.943	94.729	95.798	98.362	98.575	95.655	96.154	95.37	95.299	97.293	96.652	96.439	97.151	98.647	95.442	96.083	95.726	95.085		95.37	96.225	96.154
OL471963_Wee_NRB_SI_NSs	98.077	97.934	97.436	98.077	98.148	94.801	97.578	95.299	95.085	98.932	98.789	97.792	94.872	95.085	98.575	94.658	100	99.786	94.943	95.228	94.872	94.801	95.157	97.65	97.721	97.792	97.365	95.37		94.658	94.943
MG602673_Chr_NRB_ZW_NSs	95.157	94.872	94.516	95.157	95.37	97.863	94.658	96.296	96.083	94.801	94.302	95.085	95.798	95.94	95.085	97.151	94.658	94.587	95.94	98.006	97.792	95.798	96.296	94.872	95.513	95.014	94.658	96.225	94.658		97.863
MW854273_Tob_NRB_BG_NSs	95.442	95.157	94.801	95.442	95.655	97.934	94.943	96.368	96.296	94.872	94.587	95.37	95.798	96.011	95.37	97.293	94.943	94.872	96.154	98.219	98.077	95.869	96.225	95.157	95.798	95.299	94.943	96.154	94.943	97.863
i. Tomato_N gene
	PP622753_Tom_BL1_RB_N	PP622756_Tom_BL2_RB_N	PP632106_Tom_CA_RB_N	PP632103_Tom_MX_RB_N	OR166266_Tom_RB_IT_N	KP008131_Tom_RB_SP_N	OQ718497_Tom_RB_MX_N	HM581936_Tom_NRB_SK_N	KC261970_Tom_NRB_SK_N	ON840009_Tom_NRB_IT_N	ON840012_Tom_NRB_IT_N	KP008129_Tom_NRB_SP_N	KY495612_Tom_NRB_CN_N	JF960235_Tom_NRB_CN_N	KU179513_Tom_NRB_US_N	KY250490_Tom_NRB_SA_N	OL471957_Tom_NRB_SI_N	OL471951_Tom_NRB_SI_N	KM365066_Tom_NRB_AU_N	KC261967_Let_NRB_SK_N	KC261973_Ste_NRB_SK_N	KC261976_Chr_NRB_SK_N	KM076653_Leo_NRB_SK_N	MN493848_Zin_NRB_CN_N	MN861979_Tob_NRB_CN_N	MT241885_Tro_NRB_CN_N	KU179515_Oci_NRB_US_N	MG593199_Dat_NRB_US_N	OL471963_Wee_NRB_SI_N	MG602673_Chr_NRB_ZW_N	MW854273_Tob_NRB_BG_N
PP622753_Tom_BL1_RB_N		99.871	97.683	98.584	97.683	96.654	97.812	95.882	95.882	97.426	97.426	97.941	96.01	95.624	97.812	96.654	97.426	97.683	97.04	97.169	96.911	95.495	96.01	98.069	97.555	97.941	98.198	96.396	97.426	96.911	97.297
PP622756_Tom_BL2_RB_N	99.871		97.555	98.456	97.555	96.525	97.683	95.753	95.753	97.297	97.297	97.812	95.882	95.495	97.683	96.525	97.297	97.555	97.169	97.04	96.782	95.367	95.882	97.941	97.426	97.812	98.069	96.268	97.297	96.782	97.169
PP632106_Tom_CA_RB_N	97.683	97.555		96.268	98.198	97.426	99.871	96.654	96.654	98.198	98.198	98.584	96.782	96.396	98.584	96.396	98.198	98.456	97.555	97.683	97.426	95.753	96.782	98.584	98.069	98.456	99.228	97.04	98.198	97.426	97.555
PP632103_Tom_MX_RB_N	98.584	98.456	96.268		96.268	95.238	96.396	95.238	95.238	96.01	96.01	96.525	95.109	94.723	96.654	95.495	96.01	96.268	96.01	95.753	95.495	94.466	95.109	96.654	96.139	96.525	96.782	95.495	96.01	95.495	96.01
OR166266_Tom_RB_IT_N	97.683	97.555	98.198	96.268		96.911	98.327	96.396	96.396	98.456	98.456	98.327	96.782	96.396	98.584	96.654	98.456	98.713	97.297	97.426	97.169	95.753	96.525	98.327	99.614	98.198	98.456	96.782	98.456	97.169	97.297
KP008131_Tom_RB_SP_N	96.654	96.525	97.426	95.238	96.911		97.555	97.04	97.04	97.169	97.169	97.297	97.169	96.782	97.812	97.941	97.169	97.426	97.683	99.485	98.97	96.139	97.169	97.297	96.782	97.426	97.683	97.426	97.169	98.97	98.584
OQ718497_Tom_RB_MX_N	97.812	97.683	99.871	96.396	98.327	97.555		96.782	96.782	98.327	98.327	98.713	96.911	96.525	98.713	96.525	98.327	98.584	97.683	97.812	97.555	95.882	96.911	98.713	98.198	98.584	99.356	97.169	98.327	97.555	97.683
HM581936_Tom_NRB_SK_N	95.882	95.753	96.654	95.238	96.396	97.04	96.782		99.485	96.396	96.396	96.525	98.327	97.941	97.04	96.782	96.396	96.654	98.069	97.297	97.04	96.782	99.099	96.525	96.268	96.396	96.911	98.584	96.396	97.297	96.654
KC261970_Tom_NRB_SK_N	95.882	95.753	96.654	95.238	96.396	97.04	96.782	99.485		96.525	96.525	96.525	98.327	97.941	97.04	96.782	96.525	96.782	98.069	97.297	97.04	96.782	99.099	96.525	96.268	96.396	96.911	98.584	96.525	97.297	96.654
ON840009_Tom_NRB_IT_N	97.426	97.297	98.198	96.01	98.456	97.169	98.327	96.396	96.525		99.485	98.327	96.525	96.139	98.842	96.654	99.485	99.743	97.297	97.683	97.426	96.01	96.525	98.327	98.069	98.198	98.456	96.782	99.485	97.169	97.297
ON840012_Tom_NRB_IT_N	97.426	97.297	98.198	96.01	98.456	97.169	98.327	96.396	96.525	99.485		98.327	96.525	96.139	98.842	96.654	99.485	99.743	97.297	97.683	97.426	95.753	96.525	98.327	98.069	98.198	98.456	96.782	99.485	97.169	97.297
KP008129_Tom_NRB_SP_N	97.941	97.812	98.584	96.525	98.327	97.297	98.713	96.525	96.525	98.327	98.327		96.654	96.268	98.713	96.654	98.327	98.584	97.426	97.812	97.555	95.753	96.654	99.228	97.941	99.356	98.842	97.169	98.327	97.297	97.683
KY495612_Tom_NRB_CN_N	96.01	95.882	96.782	95.109	96.782	97.169	96.911	98.327	98.327	96.525	96.525	96.654		99.614	97.169	96.911	96.525	96.782	98.198	97.426	97.426	96.911	98.198	96.654	96.654	96.525	97.04	98.713	96.525	97.426	96.782
JF960235_Tom_NRB_CN_N	95.624	95.495	96.396	94.723	96.396	96.782	96.525	97.941	97.941	96.139	96.139	96.268	99.614		96.782	96.525	96.139	96.396	97.812	97.04	97.04	96.525	97.812	96.268	96.268	96.139	96.654	98.327	96.139	97.04	96.396
KU179513_Tom_NRB_US_N	97.812	97.683	98.584	96.654	98.584	97.812	98.713	97.04	97.04	98.842	98.842	98.713	97.169	96.782		97.297	98.842	99.099	97.941	98.327	98.069	96.396	97.169	98.713	98.198	98.584	98.842	97.426	98.842	97.812	97.941
KY250490_Tom_NRB_SA_N	96.654	96.525	96.396	95.495	96.654	97.941	96.525	96.782	96.782	96.654	96.654	96.654	96.911	96.525	97.297		96.654	96.911	97.683	98.456	97.941	96.396	96.911	96.654	96.268	96.782	96.654	97.169	96.654	98.198	97.812
OL471957_Tom_NRB_SI_N	97.426	97.297	98.198	96.01	98.456	97.169	98.327	96.396	96.525	99.485	99.485	98.327	96.525	96.139	98.842	96.654		99.743	97.297	97.683	97.426	96.01	96.525	98.327	98.069	98.198	98.456	96.782	100	97.169	97.297
OL471951_Tom_NRB_SI_N	97.683	97.555	98.456	96.268	98.713	97.426	98.584	96.654	96.782	99.743	99.743	98.584	96.782	96.396	99.099	96.911	99.743		97.555	97.941	97.683	96.01	96.782	98.584	98.327	98.456	98.713	97.04	99.743	97.426	97.555
KM365066_Tom_NRB_AU_N	97.04	97.169	97.555	96.01	97.297	97.683	97.683	98.069	98.069	97.297	97.297	97.426	98.198	97.812	97.941	97.683	97.297	97.555		97.941	97.683	97.426	98.198	97.426	97.169	97.297	97.812	98.456	97.297	98.198	98.069
KC261967_Let_NRB_SK_N	97.169	97.04	97.683	95.753	97.426	99.485	97.812	97.297	97.297	97.683	97.683	97.812	97.426	97.04	98.327	98.456	97.683	97.941	97.941		99.485	96.396	97.426	97.812	97.04	97.941	97.941	97.683	97.683	99.228	99.099
KC261973_Ste_NRB_SK_N	96.911	96.782	97.426	95.495	97.169	98.97	97.555	97.04	97.04	97.426	97.426	97.555	97.426	97.04	98.069	97.941	97.426	97.683	97.683	99.485		96.139	97.169	97.555	96.782	97.683	97.683	97.426	97.426	98.713	98.584
KC261976_Chr_NRB_SK_N	95.495	95.367	95.753	94.466	95.753	96.139	95.882	96.782	96.782	96.01	95.753	95.753	96.911	96.525	96.396	96.396	96.01	96.01	97.426	96.396	96.139		97.683	95.624	95.624	95.495	96.01	97.297	96.01	96.396	96.268
KM076653_Leo_NRB_SK_N	96.01	95.882	96.782	95.109	96.525	97.169	96.911	99.099	99.099	96.525	96.525	96.654	98.198	97.812	97.169	96.911	96.525	96.782	98.198	97.426	97.169	97.683		96.654	96.396	96.525	97.04	98.456	96.525	97.426	96.782
MN493848_Zin_NRB_CN_N	98.069	97.941	98.584	96.654	98.327	97.297	98.713	96.525	96.525	98.327	98.327	99.228	96.654	96.268	98.713	96.654	98.327	98.584	97.426	97.812	97.555	95.624	96.654		98.198	99.099	98.842	96.911	98.327	97.297	97.683
MN861979_Tob_NRB_CN_N	97.555	97.426	98.069	96.139	99.614	96.782	98.198	96.268	96.268	98.069	98.069	97.941	96.654	96.268	98.198	96.268	98.069	98.327	97.169	97.04	96.782	95.624	96.396	98.198		97.812	98.327	96.654	98.069	97.04	96.911
MT241885_Tro_NRB_CN_N	97.941	97.812	98.456	96.525	98.198	97.426	98.584	96.396	96.396	98.198	98.198	99.356	96.525	96.139	98.584	96.782	98.198	98.456	97.297	97.941	97.683	95.495	96.525	99.099	97.812		98.713	96.782	98.198	97.426	97.812
KU179515_Oci_NRB_US_N	98.198	98.069	99.228	96.782	98.456	97.683	99.356	96.911	96.911	98.456	98.456	98.842	97.04	96.654	98.842	96.654	98.456	98.713	97.812	97.941	97.683	96.01	97.04	98.842	98.327	98.713		97.297	98.456	97.683	97.812
MG593199_Dat_NRB_US_N	96.396	96.268	97.04	95.495	96.782	97.426	97.169	98.584	98.584	96.782	96.782	97.169	98.713	98.327	97.426	97.169	96.782	97.04	98.456	97.683	97.426	97.297	98.456	96.911	96.654	96.782	97.297		96.782	97.683	97.04
OL471963_Wee_NRB_SI_N	97.426	97.297	98.198	96.01	98.456	97.169	98.327	96.396	96.525	99.485	99.485	98.327	96.525	96.139	98.842	96.654	100	99.743	97.297	97.683	97.426	96.01	96.525	98.327	98.069	98.198	98.456	96.782		97.169	97.297
MG602673_Chr_NRB_ZW_N	96.911	96.782	97.426	95.495	97.169	98.97	97.555	97.297	97.297	97.169	97.169	97.297	97.426	97.04	97.812	98.198	97.169	97.426	98.198	99.228	98.713	96.396	97.426	97.297	97.04	97.426	97.683	97.683	97.169		98.842
MW854273_Tob_NRB_BG_N	97.297	97.169	97.555	96.01	97.297	98.584	97.683	96.654	96.654	97.297	97.297	97.683	96.782	96.396	97.941	97.812	97.297	97.555	98.069	99.099	98.584	96.268	96.782	97.683	96.911	97.812	97.812	97.04	97.297	98.842
2. Pepper group
a. Pepper_S segment
	PP632109_Pep_BL_RB	MW293976_Pep_RB_SK	HQ839729_Pep_RB_IT	HQ830186_Pep_RB_IT	DQ376185_Pep_RB_IT	HQ839730_Pep_RB_IT	MK692930_Pep_RB_TU	DQ915947_Pep_RB_BR	KJ649609_Pep_RB_HU	PP632112_Pep_NRB	LC549181_Pep_NRB_SK	MW293979_Pep_NRB_SK	MF159071_Pep_NRB_SK	MF159072_Pep_NRB_SK	MF159068_Pep_NRB_SK	OM022877_Pep_NRB_SK	DQ376178_Pep_NRB_IT	HQ830187_Pep_NRB_IT	MG983521_Pep_NRB_IT	MG983519_Pep_NRB_IT	MG989675_Pep_NRB_IT	MG989674_Pep_NRB_IT	DQ376184_Pep_NRB_SP	KP008134_Pep_NRB_SP	KM657114_Pep_NRB_CN	MT799179_Pep_NRB_CN	KT160282_Pep_NRB_US	KU179581_Pep_NRB_US	KU179589_Pep_NRB_US	ON924230_Pep_NRB_DE	KC261967_Let_NRB_SK	KC261973_Ste_NRB_SK	KC261976_Chr_NRB_SK	KM076653_Leo_NRB_SK	MN493848_Zin_NRB_CN	MN861979_Tob_NRB_CN	MT241885_Tro_NRB_CN	KU179515_Oci_NRB_US	MG593199_Dat_NRB_US	OL471963_Wee_NRB_SI	MG602673_Chr_NRB_ZW	MW854273_Tob_NRB_BG
PP632109_Pep_BL_RB		93.998	95.095	91.555	95.227	95.095	88.934	93.741	91.546	97.4	93.758	91.698	91.827	91.256	91.602	89.836	95.129	91.588	91.242	89.384	92.441	91.089	95.295	93.925	91.331	95.16	93.137	94.458	96.627	95.06	91.826	91.426	89.587	91.407	94.819	94.567	95.193	93.79	91.332	94.755	91.174	91.401
MW293976_Pep_RB_SK	93.998		96.706	92.862	97.143	96.706	90.05	95.385	92.855	96.22	95.491	93.297	93.396	92.792	93.295	91.438	96.74	92.895	92.867	91.176	94.126	92.228	97.211	95.759	92.996	97.041	94.758	96.37	96.642	96.908	93.132	92.8	91.425	93.036	97.754	96.575	97.007	95.79	92.708	96.334	92.382	92.609
HQ839729_Pep_RB_IT	95.095	96.706		93.809	97.578	99.932	91.019	96.319	93.735	97.302	95.984	94.054	94.221	93.581	94.048	92.181	99.966	93.843	93.651	91.885	96.414	93.073	97.647	96.421	93.613	97.544	95.351	97.208	97.245	97.681	94.013	93.645	91.997	93.754	97.306	96.946	97.544	96.354	93.689	99.488	93.358	93.486
HQ830186_Pep_RB_IT	91.555	92.862	93.809		93.838	93.809	95.818	93.174	97.273	93.436	92.269	94.454	94.686	94.217	94.281	92.912	93.843	99.966	94.682	92.955	93.102	98.213	93.906	92.602	94.342	93.805	93.267	93.605	93.452	93.773	99.157	98.786	92.895	94.346	93.502	93.626	93.771	93.559	93.993	93.571	97.244	97.343
DQ376185_Pep_RB_IT	95.227	97.143	97.578	93.838		97.578	91.246	96.046	93.832	97.403	97.53	94.118	94.149	93.611	94.044	92.013	97.613	93.872	93.58	91.781	94.986	93.268	99.795	97.833	93.773	99.008	95.512	97.103	97.379	97.849	94.141	93.739	91.895	93.716	98.529	97.11	98.974	96.582	93.615	97.271	93.286	93.582
HQ839730_Pep_RB_IT	95.095	96.706	99.932	93.809	97.578		91.019	96.319	93.735	97.302	95.984	94.054	94.221	93.581	94.048	92.181	99.966	93.843	93.651	91.885	96.414	93.073	97.647	96.421	93.613	97.544	95.351	97.208	97.245	97.681	94.013	93.645	91.997	93.754	97.306	96.946	97.544	96.354	93.689	99.488	93.358	93.486
MK692930_Pep_RB_TU	88.934	90.05	91.019	95.818	91.246	91.019		90.319	94.343	90.624	89.64	91.896	92.026	91.524	91.736	90.171	91.053	95.852	91.937	90.247	90.582	95.513	91.313	89.907	91.762	91.047	90.733	90.882	90.567	90.983	96.22	95.849	90.353	91.703	90.71	90.943	91.08	90.909	91.239	90.814	94.086	94.183
DQ915947_Pep_RB_BR	93.741	95.385	96.319	93.174	96.046	96.319	90.319		93.134	95.896	94.469	93.486	93.518	93.183	93.315	91.751	96.353	93.208	92.917	91.323	93.797	92.44	96.115	95.04	93.08	96.08	93.888	95.713	95.822	95.947	93.311	93.109	91.342	93.022	96.012	95.353	96.046	94.939	93.084	96.113	92.924	92.785
KJ649609_Pep_RB_HU	91.546	92.855	93.735	97.273	93.832	93.735	94.343	93.134		93.497	92.295	94.256	94.42	93.75	94.084	92.449	93.769	97.306	94.051	92.328	92.624	96.567	93.9	92.628	94.212	93.866	93.009	93.767	93.513	93.868	97.441	97.004	92.671	94.283	93.495	93.588	93.866	93.653	93.557	93.497	97.11	98.249
PP632112_Pep_NRB	97.4	96.22	97.302	93.436	97.403	97.302	90.624	95.896	93.497		95.83	93.648	93.752	93.21	93.612	91.796	97.337	93.47	93.348	91.571	94.693	93	97.472	96.067	93.407	97.335	95.191	96.655	99.055	97.267	93.71	93.339	91.681	93.517	97.094	96.694	97.368	95.999	93.316	96.925	93.048	93.244
LC549181_Pep_NRB_SK	93.758	95.491	95.984	92.269	97.53	95.984	89.64	94.469	92.295	95.83		92.542	92.573	92.107	92.477	90.535	96.018	92.303	92.019	90.242	93.385	91.675	97.597	98.545	92.141	97.294	93.934	95.547	95.857	96.284	92.605	92.141	90.37	92.282	96.719	95.459	97.259	95.042	92.012	95.68	91.761	91.985
MW293979_Pep_NRB_SK	91.698	93.297	94.054	94.454	94.118	94.054	91.896	93.486	94.256	93.648	92.542		99.222	98.513	99.425	96.265	94.088	94.487	98.412	96.73	92.5	94.05	94.185	92.876	97.938	94.289	93.966	93.716	93.659	94.054	94.755	94.42	94.914	97.873	93.849	94.096	94.153	93.605	97.229	93.818	94.433	94.163
MF159071_Pep_NRB_SK	91.827	93.396	94.221	94.686	94.149	94.221	92.026	93.518	94.42	93.752	92.573	99.222		98.343	98.985	96.162	94.255	94.719	98.412	96.728	92.633	94.215	94.217	92.907	98.039	94.253	94.129	93.883	93.824	94.221	94.919	94.551	95.077	98.074	93.881	94.263	94.118	93.771	97.262	94.05	94.564	94.327
MF159072_Pep_NRB_SK	91.256	92.792	93.581	94.217	93.611	93.581	91.524	93.183	93.75	93.21	92.107	98.513	98.343		98.276	96.331	93.615	94.25	97.973	96.258	91.993	93.679	93.678	92.441	97.262	93.714	93.561	93.243	93.284	93.581	94.383	94.015	94.378	97.264	93.275	93.59	93.579	93.167	96.823	93.41	93.995	93.691
MF159068_Pep_NRB_SK	91.602	93.295	94.048	94.281	94.044	94.048	91.736	93.315	94.084	93.612	92.477	99.425	98.985	98.276		96.083	94.082	94.314	98.118	96.342	92.367	93.712	94.112	92.81	97.814	94.147	93.961	93.712	93.656	94.015	94.58	94.247	94.773	97.917	93.71	94.09	94.08	93.601	97.075	93.813	94.294	94.059
OM022877_Pep_NRB_SK	89.836	91.438	92.181	92.912	92.013	92.181	90.171	91.751	92.449	91.796	90.535	96.265	96.162	96.331	96.083		92.215	92.946	95.651	94.08	90.57	92.076	92.081	90.933	94.98	92.246	91.661	91.751	91.954	92.181	92.879	92.513	92.638	95.082	91.812	92.192	92.047	91.714	96.154	92.011	92.695	92.231
DQ376178_Pep_NRB_IT	95.129	96.74	99.966	93.843	97.613	99.966	91.053	96.353	93.769	97.337	96.018	94.088	94.255	93.615	94.082	92.215		93.876	93.685	91.918	96.448	93.107	97.681	96.455	93.647	97.578	95.385	97.242	97.279	97.715	94.046	93.679	92.03	93.788	97.34	96.98	97.578	96.388	93.723	99.522	93.391	93.519
HQ830187_Pep_NRB_IT	91.588	92.895	93.843	99.966	93.872	93.843	95.852	93.208	97.306	93.47	92.303	94.487	94.719	94.25	94.314	92.946	93.876		94.716	92.988	93.136	98.247	93.939	92.636	94.376	93.838	93.3	93.639	93.486	93.807	99.191	98.82	92.928	94.379	93.535	93.66	93.805	93.593	94.027	93.605	97.277	97.376
MG983521_Pep_NRB_IT	91.242	92.867	93.651	94.682	93.58	93.651	91.937	92.917	94.051	93.348	92.019	98.412	98.412	97.973	98.118	95.651	93.685	94.716		97.517	92.039	93.98	93.647	92.318	97.412	93.75	93.731	93.383	93.293	93.584	94.714	94.448	94.478	97.515	93.313	93.76	93.683	93.338	97.11	93.416	94.127	93.959
MG983519_Pep_NRB_IT	89.384	91.176	91.885	92.955	91.781	91.885	90.247	91.323	92.328	91.571	90.242	96.73	96.728	96.258	96.342	94.08	91.918	92.988	97.517		90.51	92.356	91.848	90.541	95.673	92.019	91.847	91.653	91.499	91.851	92.955	92.654	93.122	95.61	91.65	91.865	91.851	91.614	95.305	91.683	92.274	92.239
MG989675_Pep_NRB_IT	92.441	94.126	96.414	93.102	94.986	96.414	90.582	93.797	92.624	94.693	93.385	92.5	92.633	91.993	92.367	90.57	96.448	93.136	92.039	90.51		92.768	95.055	93.723	92.101	94.884	92.876	94.45	94.594	95.089	93.374	93.006	90.41	92.21	94.645	94.197	94.884	93.687	92.134	96.107	92.284	92.31
MG989674_Pep_NRB_IT	91.089	92.228	93.073	98.213	93.268	93.073	95.513	92.44	96.567	93	91.675	94.05	94.215	93.679	93.712	92.076	93.107	98.247	93.98	92.356	92.768		93.336	92.008	93.84	93.203	92.867	92.869	92.852	93.105	98.718	98.279	92.239	93.746	92.799	93.025	93.17	92.955	93.188	92.9	96.539	96.638
DQ376184_Pep_NRB_SP	95.295	97.211	97.647	93.906	99.795	97.647	91.313	96.115	93.9	97.472	97.597	94.185	94.217	93.678	94.112	92.081	97.681	93.939	93.647	91.848	95.055	93.336		97.901	93.84	99.077	95.512	97.171	97.447	97.917	94.209	93.807	91.895	93.784	98.598	97.178	99.042	96.65	93.682	97.34	93.353	93.649
KP008134_Pep_NRB_SP	93.925	95.759	96.421	92.602	97.833	96.421	89.907	95.04	92.628	96.067	98.545	92.876	92.907	92.441	92.81	90.933	96.455	92.636	92.318	90.541	93.723	92.008	97.901		92.538	97.597	94.2	95.717	96.058	96.52	92.938	92.538	90.698	92.484	97.09	95.793	97.563	95.211	92.344	96.117	92.19	92.251
KM657114_Pep_NRB_CN	91.331	92.996	93.613	94.342	93.773	93.613	91.762	93.08	94.212	93.407	92.141	97.938	98.039	97.262	97.814	94.98	93.647	94.376	97.412	95.673	92.101	93.84	93.84	92.538		93.845	93.794	93.477	93.421	93.679	94.642	94.441	94.772	97.513	93.407	93.92	93.742	93.499	96.503	93.443	94.287	94.053
MT799179_Pep_NRB_CN	95.16	97.041	97.544	93.805	99.008	97.544	91.047	96.08	93.866	97.335	97.294	94.289	94.253	93.714	94.147	92.246	97.578	93.838	93.75	92.019	94.884	93.203	99.077	97.597	93.845		95.38	97.069	97.312	97.782	94.076	93.674	91.829	93.884	98.769	97.009	99.487	96.516	93.784	97.237	93.387	93.548
KT160282_Pep_NRB_US	93.137	94.758	95.351	93.267	95.512	95.351	90.733	93.888	93.009	95.191	93.934	93.966	94.129	93.561	93.961	91.661	95.385	93.3	93.731	91.847	92.876	92.867	95.512	94.2	93.794	95.38		94.721	95.581	95.646	93.731	93.367	92.973	93.831	95.079	95.686	95.412	95.85	93.086	95.216	93.369	93.047
KU179581_Pep_NRB_US	94.458	96.37	97.208	93.605	97.103	97.208	90.882	95.713	93.767	96.655	95.547	93.716	93.883	93.243	93.712	91.751	97.242	93.639	93.383	91.653	94.45	92.869	97.171	95.717	93.477	97.069	94.721		96.573	97.14	93.809	93.508	91.796	93.649	96.898	96.271	97.069	98.377	93.383	96.902	93.387	93.515
KU179589_Pep_NRB_US	96.627	96.642	97.245	93.452	97.379	97.245	90.567	95.822	93.513	99.055	95.857	93.659	93.824	93.284	93.656	91.954	97.279	93.486	93.293	91.499	94.594	92.852	97.447	96.058	93.421	97.312	95.581	96.573		97.244	93.723	93.322	92.033	93.561	97.074	96.943	97.345	95.991	93.268	96.939	93.003	93.197
ON924230_Pep_NRB_DE	95.06	96.908	97.681	93.773	97.849	97.681	90.983	95.947	93.868	97.267	96.284	94.054	94.221	93.581	94.015	92.181	97.715	93.807	93.584	91.851	95.089	93.105	97.917	96.52	93.679	97.782	95.646	97.14	97.244		94.044	93.676	91.962	93.721	97.474	96.976	97.815	96.619	93.387	97.374	93.421	93.486
KC261967_Let_NRB_SK	91.826	93.132	94.013	99.157	94.141	94.013	96.22	93.311	97.441	93.71	92.605	94.755	94.919	94.383	94.58	92.879	94.046	99.191	94.714	92.955	93.374	98.718	94.209	92.938	94.642	94.076	93.731	93.809	93.723	94.044		99.392	93.095	94.614	93.739	93.962	94.042	93.828	94.126	93.775	97.412	97.578
KC261973_Ste_NRB_SK	91.426	92.8	93.645	98.786	93.739	93.645	95.849	93.109	97.004	93.339	92.141	94.42	94.551	94.015	94.247	92.513	93.679	98.82	94.448	92.654	93.006	98.279	93.807	92.538	94.441	93.674	93.367	93.508	93.322	93.676	99.392		92.862	94.247	93.338	93.626	93.641	93.461	93.758	93.439	97.076	97.176
KC261976_Chr_NRB_SK	89.587	91.425	91.997	92.895	91.895	91.997	90.353	91.342	92.671	91.681	90.37	94.914	95.077	94.378	94.773	92.638	92.03	92.928	94.478	93.122	90.41	92.239	91.895	90.698	94.772	91.829	92.973	91.796	92.033	91.962	93.095	92.862		95.4	91.465	92.201	91.664	92.163	93.549	91.959	93.126	92.643
KM076653_Leo_NRB_SK	91.407	93.036	93.754	94.346	93.716	93.754	91.703	93.022	94.283	93.517	92.282	97.873	98.074	97.264	97.917	95.082	93.788	94.379	97.515	95.61	92.21	93.746	93.784	92.484	97.513	93.884	93.831	93.649	93.561	93.721	94.614	94.247	95.4		93.515	93.83	93.75	93.603	96.371	93.584	94.426	94.124
MN493848_Zin_NRB_CN	94.819	97.754	97.306	93.502	98.529	97.306	90.71	96.012	93.495	97.094	96.719	93.849	93.881	93.275	93.71	91.812	97.34	93.535	93.313	91.65	94.645	92.799	98.598	97.09	93.407	98.769	95.079	96.898	97.074	97.474	93.739	93.338	91.465	93.515		96.771	98.632	96.346	93.279	96.999	92.951	93.179
MN861979_Tob_NRB_CN	94.567	96.575	96.946	93.626	97.11	96.946	90.943	95.353	93.588	96.694	95.459	94.096	94.263	93.59	94.09	92.192	96.98	93.66	93.76	91.865	94.197	93.025	97.178	95.793	93.92	97.009	95.686	96.271	96.943	96.976	93.962	93.626	92.201	93.83	96.771		97.042	95.725	93.114	96.774	93.244	93.273
MT241885_Tro_NRB_CN	95.193	97.007	97.544	93.771	98.974	97.544	91.08	96.046	93.866	97.368	97.259	94.153	94.118	93.579	94.08	92.047	97.578	93.805	93.683	91.851	94.884	93.17	99.042	97.563	93.742	99.487	95.412	97.069	97.345	97.815	94.042	93.641	91.664	93.75	98.632	97.042		96.548	93.583	97.237	93.32	93.548
KU179515_Oci_NRB_US	93.79	95.79	96.354	93.559	96.582	96.354	90.909	94.939	93.653	95.999	95.042	93.605	93.771	93.167	93.601	91.714	96.388	93.593	93.338	91.614	93.687	92.955	96.65	95.211	93.499	96.516	95.85	98.377	95.991	96.619	93.828	93.461	92.163	93.603	96.346	95.725	96.548		93.273	96.05	93.501	93.403
MG593199_Dat_NRB_US	91.332	92.708	93.689	93.993	93.615	93.689	91.239	93.084	93.557	93.316	92.012	97.229	97.262	96.823	97.075	96.154	93.723	94.027	97.11	95.305	92.134	93.188	93.682	92.344	96.503	93.784	93.086	93.383	93.268	93.387	94.126	93.758	93.549	96.371	93.279	93.114	93.583	93.273		93.518	93.702	93.4
OL471963_Wee_NRB_SI	94.755	96.334	99.488	93.571	97.271	99.488	90.814	96.113	93.497	96.925	95.68	93.818	94.05	93.41	93.813	92.011	99.522	93.605	93.416	91.683	96.107	92.9	97.34	96.117	93.443	97.237	95.216	96.902	96.939	97.374	93.775	93.439	91.959	93.584	96.999	96.774	97.237	96.05	93.518		93.186	93.315
MG602673_Chr_NRB_ZW	91.174	92.382	93.358	97.244	93.286	93.358	94.086	92.924	97.11	93.048	91.761	94.433	94.564	93.995	94.294	92.695	93.391	97.277	94.127	92.274	92.284	96.539	93.353	92.19	94.287	93.387	93.369	93.387	93.003	93.421	97.412	97.076	93.126	94.426	92.951	93.244	93.32	93.501	93.702	93.186		97.246
MW854273_Tob_NRB_BG	91.401	92.609	93.486	97.343	93.582	93.486	94.183	92.785	98.249	93.244	91.985	94.163	94.327	93.691	94.059	92.231	93.519	97.376	93.959	92.239	92.31	96.638	93.649	92.251	94.053	93.548	93.047	93.515	93.197	93.486	97.578	97.176	92.643	94.124	93.179	93.273	93.548	93.403	93.4	93.315	97.246
b. Pepper_NSs
	PP632109_Pep_BL_RB_NSs	MW293976_Pep_RB_SK_NSs	HQ839729_Pep_RB_IT_NSs	HQ830186_Pep_RB_IT_NSs	DQ376185_Pep_RB_IT_NSs	HQ839730_Pep_RB_IT_NSs	MK692930_Pep_RB_TU_NSs	DQ915947_Pep_RB_BR_NSs	KJ649609_Pep_RB_HU_NSs	PP632112_Pep_NRB_NSs	LC549181_Pep_NRB_SK_NSs	MW293979_Pep_NRB_SK_NSs	MF159071_Pep_NRB_SK_NSs	MF159072_Pep_NRB_SK_NSs	MF159068_Pep_NRB_SK_NSs	OM022877_Pep_NRB_SK_NSs	DQ376178_Pep_NRB_IT_NSs	HQ830187_Pep_NRB_IT_NSs	MG983521_Pep_NRB_IT_NSs	MG983519_Pep_NRB_IT_NSs	MG989675_Pep_NRB_IT_NSs	MG989674_Pep_NRB_IT_NSs	DQ376184_Pep_NRB_SP_NSs	KP008134_Pep_NRB_SP_NSs	KM657114_Pep_NRB_CN_NSs	MT799179_Pep_NRB_CN_NSs	KT160282_Pep_NRB_US_NSs	KU179581_Pep_NRB_US_NSs	KU179589_Pep_NRB_US_NSs	ON924230_Pep_NRB_DE_NSs	KC261967_Let_NRB_SK_NSs	KC261973_Ste_NRB_SK_NSs	KC261976_Chr_NRB_SK_NSs	KM076653_Leo_NRB_SK_NSs	MN493848_Zin_NRB_CN_NSs	MN861979_Tob_NRB_CN_NSs	MT241885_Tro_NRB_CN_NSs	KU179515_Oci_NRB_US_NSs	MG593199_Dat_NRB_US_NSs	OL471963_Wee_NRB_SI_NSs	MG602673_Chr_NRB_ZW_NSs	MW854273_Tob_NRB_BG_NSs
PP632109_Pep_BL_RB_NSs		97.934	97.899	95.424	98.148	97.428	95.085	96.866	95.37	99.679	97.792	95.37	95.513	95.299	95.085	95.299	98.006	95.228	95.37	95.442	96.51	95.299	98.219	97.792	95.157	98.006	97.507	97.293	99.217	97.934	95.513	95.157	94.872	95.37	98.006	97.934	98.006	97.365	95.584	97.65	94.943	95.228
MW293976_Pep_RB_SK_NSs	97.934		97.899	95.199	98.219	97.531	95.014	96.866	95.228	97.828	97.721	95.157	95.299	95.085	94.872	95.085	97.934	95.085	95.157	95.228	96.225	95.014	98.291	97.863	94.943	98.077	97.578	97.365	98.291	98.006	95.37	95.014	94.943	95.157	98.932	97.863	98.077	97.436	95.37	97.578	94.801	95.085
HQ839729_Pep_RB_IT_NSs	97.899	97.899		95.499	98.05	99.897	95.349	97.074	95.499	97.787	97.599	95.499	95.799	95.349	95.199	95.424	99.925	95.574	95.574	95.649	96.699	95.349	98.125	97.974	95.199	98.125	97.674	97.524	98.125	98.05	95.649	95.349	95.124	95.499	97.974	98.125	98.125	97.674	95.799	99.625	95.124	95.424
HQ830186_Pep_RB_IT_NSs	95.424	95.199	95.499		95.499	95.679	99.1	95.424	98.35	95.311	95.049	96.474	96.849	96.249	96.024	96.324	95.574	99.925	96.624	96.699	97.899	98.95	95.574	95.349	96.249	95.424	95.424	95.049	95.499	95.349	99.4	99.1	96.174	96.699	95.274	96.174	95.424	95.199	96.699	95.274	98.125	98.125
DQ376185_Pep_RB_IT_NSs	98.148	98.219	98.05	95.499		98.045	95.37	97.009	95.442	98.041	98.789	95.655	95.655	95.442	95.228	95.442	98.148	95.442	95.37	95.584	96.581	95.37	99.644	98.932	95.299	99.003	97.792	97.436	98.504	98.362	95.726	95.37	95.299	95.513	98.718	98.077	98.86	97.507	95.726	97.792	95.014	95.299
HQ839730_Pep_RB_IT_NSs	97.428	97.531	99.897	95.679	98.045		95.37	97.428	95.679	97.479	97.531	95.267	95.473	95.062	95.062	95.165	99.897	95.679	95.267	95.267	95.782	95.473	98.045	98.148	94.959	97.942	97.737	97.428	97.737	98.148	95.679	95.267	95.165	95.267	97.84	98.354	97.942	97.634	95.37	99.691	95.165	95.473
MK692930_Pep_RB_TU_NSs	95.085	95.014	95.349	99.1	95.37	95.37		95.228	98.006	94.979	94.872	96.296	96.51	96.154	95.869	96.154	95.228	99.217	96.368	96.439	97.507	99.003	95.442	95.157	96.296	95.228	95.157	94.801	95.299	95.157	99.217	99.003	96.011	96.51	95.085	95.726	95.228	94.872	96.439	94.872	97.792	97.863
DQ915947_Pep_RB_BR_NSs	96.866	96.866	97.074	95.424	97.009	97.428	95.228		95.442	96.902	96.51	95.513	95.513	95.442	95.085	95.442	97.009	95.299	95.37	95.442	95.584	95.228	97.08	96.652	95.299	97.009	96.652	96.439	97.151	96.937	95.442	95.37	94.943	95.513	97.009	96.795	97.009	96.51	95.584	96.652	95.014	95.157
KJ649609_Pep_RB_HU_NSs	95.37	95.228	95.499	98.35	95.442	95.679	98.006	95.442		95.264	94.943	96.296	96.51	96.154	95.869	96.154	95.442	98.219	96.51	96.439	96.866	98.006	95.513	95.37	96.296	95.442	95.37	95.014	95.584	95.513	98.219	98.006	96.296	96.51	95.299	95.94	95.442	95.085	96.439	95.085	97.934	98.86
PP632112_Pep_NRB_NSs	99.679	97.828	97.787	95.311	98.041	97.479	94.979	96.902	95.264		97.614	95.264	95.406	95.192	94.979	95.192	97.899	95.121	95.264	95.335	96.403	95.192	98.113	97.685	95.192	97.899	97.4	97.187	99.038	97.828	95.406	95.05	94.765	95.264	97.899	97.828	97.899	97.258	95.477	97.543	94.836	95.121
LC549181_Pep_NRB_SK_NSs	97.792	97.721	97.599	95.049	98.789	97.531	94.872	96.51	94.943	97.614		95.157	95.157	94.943	94.729	94.943	97.65	94.943	95.014	95.228	96.083	94.872	98.86	98.86	94.801	98.504	97.436	96.937	98.148	98.006	95.37	94.872	94.801	95.014	98.219	97.578	98.362	97.009	95.228	97.293	94.516	94.801
MW293979_Pep_NRB_SK_NSs	95.37	95.157	95.499	96.474	95.655	95.267	96.296	95.513	96.296	95.264	95.157		99.003	99.217	99.288	99.359	95.37	96.368	98.86	98.932	95.584	96.154	95.726	95.299	98.077	95.798	95.299	94.801	95.442	95.299	96.368	96.154	96.937	98.433	95.37	95.869	95.798	94.872	98.932	95.157	96.083	96.011
MF159071_Pep_NRB_SK_NSs	95.513	95.299	95.799	96.849	95.655	95.473	96.51	95.513	96.51	95.406	95.157	99.003		98.86	98.575	99.074	95.655	96.724	99.003	99.074	95.798	96.368	95.726	95.299	98.219	95.655	95.442	95.085	95.584	95.442	96.581	96.368	97.08	98.575	95.37	96.154	95.655	95.157	99.074	95.442	96.154	96.225
MF159072_Pep_NRB_SK_NSs	95.299	95.085	95.349	96.249	95.442	95.062	96.154	95.442	96.154	95.192	94.943	99.217	98.86		98.647	99.43	95.299	96.225	98.647	98.718	95.442	96.011	95.513	95.085	98.006	95.584	95.228	94.729	95.37	95.228	96.225	96.011	96.866	98.362	95.157	95.798	95.442	94.801	98.718	95.085	95.94	95.869
MF159068_Pep_NRB_SK_NSs	95.085	94.872	95.199	96.024	95.228	95.062	95.869	95.085	95.869	94.979	94.729	99.288	98.575	98.647		98.789	95.085	95.94	98.433	98.504	95.157	95.726	95.299	94.872	97.65	95.37	95.014	94.516	95.157	95.014	95.94	95.726	96.51	98.291	94.943	95.584	95.37	94.587	98.504	94.872	95.655	95.726
OM022877_Pep_NRB_SK_NSs	95.299	95.085	95.424	96.324	95.442	95.165	96.154	95.442	96.154	95.192	94.943	99.359	99.074	99.43	98.789		95.299	96.225	98.789	98.86	95.442	96.011	95.513	95.085	98.006	95.584	95.228	94.729	95.37	95.228	96.225	96.011	96.866	98.362	95.157	95.798	95.442	94.801	98.86	95.085	95.94	95.869
DQ376178_Pep_NRB_IT_NSs	98.006	97.934	99.925	95.574	98.148	99.897	95.228	97.009	95.442	97.899	97.65	95.37	95.655	95.299	95.085	95.299		95.442	95.37	95.442	96.866	95.228	98.219	98.006	95.157	98.148	97.65	97.65	98.219	98.077	95.584	95.228	95.014	95.37	98.006	98.077	98.148	97.721	95.584	99.644	95.014	95.299
HQ830187_Pep_NRB_IT_NSs	95.228	95.085	95.574	99.925	95.442	95.679	99.217	95.299	98.219	95.121	94.943	96.368	96.724	96.225	95.94	96.225	95.442		96.439	96.51	97.578	99.074	95.513	95.228	96.225	95.299	95.228	95.014	95.442	95.228	99.43	99.217	96.083	96.581	95.157	95.94	95.299	95.085	96.51	95.085	98.006	98.077
MG983521_Pep_NRB_IT_NSs	95.37	95.157	95.574	96.624	95.37	95.267	96.368	95.37	96.51	95.264	95.014	98.86	99.003	98.647	98.433	98.789	95.37	96.439		99.359	95.513	96.225	95.442	95.157	98.219	95.655	95.299	94.801	95.442	95.299	96.439	96.368	97.08	98.575	95.228	96.011	95.513	94.872	99.074	95.157	96.296	96.225
MG983519_Pep_NRB_IT_NSs	95.442	95.228	95.649	96.699	95.584	95.267	96.439	95.442	96.439	95.335	95.228	98.932	99.074	98.718	98.504	98.86	95.442	96.51	99.359		95.726	96.296	95.655	95.228	98.291	95.726	95.228	94.872	95.513	95.37	96.51	96.296	97.151	98.647	95.299	95.94	95.584	94.943	99.145	95.228	96.225	96.154
MG989675_Pep_NRB_IT_NSs	96.51	96.225	96.699	97.899	96.581	95.782	97.507	95.584	96.866	96.403	96.083	95.584	95.798	95.442	95.157	95.442	96.866	97.578	95.513	95.726		97.934	96.652	96.368	95.584	96.439	96.225	95.798	96.724	96.368	97.863	97.507	95.157	95.655	96.296	96.225	96.439	96.011	95.869	96.51	96.439	96.581
MG989674_Pep_NRB_IT_NSs	95.299	95.014	95.349	98.95	95.37	95.473	99.003	95.228	98.006	95.192	94.872	96.154	96.368	96.011	95.726	96.011	95.228	99.074	96.225	96.296	97.934		95.442	95.157	96.154	95.228	95.299	94.801	95.513	95.157	99.074	98.86	95.869	96.368	95.085	95.726	95.228	94.872	96.296	94.872	97.792	97.863
DQ376184_Pep_NRB_SP_NSs	98.219	98.291	98.125	95.574	99.644	98.045	95.442	97.08	95.513	98.113	98.86	95.726	95.726	95.513	95.299	95.513	98.219	95.513	95.442	95.655	96.652	95.442		99.003	95.37	99.074	97.863	97.507	98.575	98.433	95.798	95.442	95.228	95.584	98.789	98.148	98.932	97.578	95.798	97.863	95.085	95.37
KP008134_Pep_NRB_SP_NSs	97.792	97.863	97.974	95.349	98.932	98.148	95.157	96.652	95.37	97.685	98.86	95.299	95.299	95.085	94.872	95.085	98.006	95.228	95.157	95.228	96.368	95.157	99.003		94.943	98.647	97.436	97.08	98.148	98.148	95.655	95.157	94.943	95.157	98.362	97.721	98.504	97.151	95.37	97.65	94.801	95.085
KM657114_Pep_NRB_CN_NSs	95.157	94.943	95.199	96.249	95.299	94.959	96.296	95.299	96.296	95.192	94.801	98.077	98.219	98.006	97.65	98.006	95.157	96.225	98.219	98.291	95.584	96.154	95.37	94.943		95.442	95.228	94.587	95.228	95.085	96.225	96.011	97.009	98.219	95.014	95.655	95.299	94.658	98.433	94.943	95.798	95.869
MT799179_Pep_NRB_CN_NSs	98.006	98.077	98.125	95.424	99.003	97.942	95.228	97.009	95.442	97.899	98.504	95.798	95.655	95.584	95.37	95.584	98.148	95.299	95.655	95.726	96.439	95.228	99.074	98.647	95.442		97.792	97.436	98.362	98.362	95.584	95.228	95.157	95.655	98.86	98.077	99.573	97.507	95.869	97.792	95.157	95.299
KT160282_Pep_NRB_US_NSs	97.507	97.578	97.674	95.424	97.792	97.737	95.157	96.652	95.37	97.4	97.436	95.299	95.442	95.228	95.014	95.228	97.65	95.228	95.299	95.228	96.225	95.299	97.863	97.436	95.228	97.792		96.937	97.863	97.863	95.513	95.157	95.085	95.299	97.65	97.721	97.792	97.009	95.513	97.436	94.943	95.228
KU179581_Pep_NRB_US_NSs	97.293	97.365	97.524	95.049	97.436	97.428	94.801	96.439	95.014	97.187	96.937	94.801	95.085	94.729	94.516	94.729	97.65	95.014	94.801	94.872	95.798	94.801	97.507	97.08	94.587	97.436	96.937		97.507	97.507	95.157	94.801	94.444	94.943	97.436	97.365	97.436	99.501	95.014	97.293	94.587	94.872
KU179589_Pep_NRB_US_NSs	99.217	98.291	98.125	95.499	98.504	97.737	95.299	97.151	95.584	99.038	98.148	95.442	95.584	95.37	95.157	95.37	98.219	95.442	95.442	95.513	96.724	95.513	98.575	98.148	95.228	98.362	97.863	97.507		98.291	95.726	95.37	95.085	95.442	98.362	98.148	98.362	97.578	95.655	97.863	95.157	95.442
ON924230_Pep_NRB_DE_NSs	97.934	98.006	98.05	95.349	98.362	98.148	95.157	96.937	95.513	97.828	98.006	95.299	95.442	95.228	95.014	95.228	98.077	95.228	95.299	95.37	96.368	95.157	98.433	98.148	95.085	98.362	97.863	97.507	98.291		95.513	95.157	95.085	95.299	98.077	98.006	98.362	97.578	95.513	97.721	94.943	95.228
KC261967_Let_NRB_SK_NSs	95.513	95.37	95.649	99.4	95.726	95.679	99.217	95.442	98.219	95.406	95.37	96.368	96.581	96.225	95.94	96.225	95.584	99.43	96.439	96.51	97.863	99.074	95.798	95.655	96.225	95.584	95.513	95.157	95.726	95.513		99.43	96.083	96.581	95.442	96.083	95.584	95.228	96.652	95.228	98.006	98.219
KC261973_Ste_NRB_SK_NSs	95.157	95.014	95.349	99.1	95.37	95.267	99.003	95.37	98.006	95.05	94.872	96.154	96.368	96.011	95.726	96.011	95.228	99.217	96.368	96.296	97.507	98.86	95.442	95.157	96.011	95.228	95.157	94.801	95.37	95.157	99.43		95.869	96.368	95.085	95.726	95.228	94.872	96.439	94.872	97.792	98.077
KC261976_Chr_NRB_SK_NSs	94.872	94.943	95.124	96.174	95.299	95.165	96.011	94.943	96.296	94.765	94.801	96.937	97.08	96.866	96.51	96.866	95.014	96.083	97.08	97.151	95.157	95.869	95.228	94.943	97.009	95.157	95.085	94.444	95.085	95.085	96.083	95.869		97.222	94.872	95.513	95.014	94.516	97.151	94.801	95.798	95.869
KM076653_Leo_NRB_SK_NSs	95.37	95.157	95.499	96.699	95.513	95.267	96.51	95.513	96.51	95.264	95.014	98.433	98.575	98.362	98.291	98.362	95.37	96.581	98.575	98.647	95.655	96.368	95.584	95.157	98.219	95.655	95.299	94.943	95.442	95.299	96.581	96.368	97.222		95.228	96.011	95.513	95.014	98.647	95.157	96.296	96.225
MN493848_Zin_NRB_CN_NSs	98.006	98.932	97.974	95.274	98.718	97.84	95.085	97.009	95.299	97.899	98.219	95.37	95.37	95.157	94.943	95.157	98.006	95.157	95.228	95.299	96.296	95.085	98.789	98.362	95.014	98.86	97.65	97.436	98.362	98.077	95.442	95.085	94.872	95.228		97.934	98.86	97.507	95.442	97.65	94.872	95.157
MN861979_Tob_NRB_CN_NSs	97.934	97.863	98.125	96.174	98.077	98.354	95.726	96.795	95.94	97.828	97.578	95.869	96.154	95.798	95.584	95.798	98.077	95.94	96.011	95.94	96.225	95.726	98.148	97.721	95.655	98.077	97.721	97.365	98.148	98.006	96.083	95.726	95.513	96.011	97.934		98.077	97.436	96.083	97.721	95.513	95.798
MT241885_Tro_NRB_CN_NSs	98.006	98.077	98.125	95.424	98.86	97.942	95.228	97.009	95.442	97.899	98.362	95.798	95.655	95.442	95.37	95.442	98.148	95.299	95.513	95.584	96.439	95.228	98.932	98.504	95.299	99.573	97.792	97.436	98.362	98.362	95.584	95.228	95.014	95.513	98.86	98.077		97.507	95.726	97.792	95.014	95.299
KU179515_Oci_NRB_US_NSs	97.365	97.436	97.674	95.199	97.507	97.634	94.872	96.51	95.085	97.258	97.009	94.872	95.157	94.801	94.587	94.801	97.721	95.085	94.872	94.943	96.011	94.872	97.578	97.151	94.658	97.507	97.009	99.501	97.578	97.578	95.228	94.872	94.516	95.014	97.507	97.436	97.507		95.085	97.365	94.658	94.943
MG593199_Dat_NRB_US_NSs	95.584	95.37	95.799	96.699	95.726	95.37	96.439	95.584	96.439	95.477	95.228	98.932	99.074	98.718	98.504	98.86	95.584	96.51	99.074	99.145	95.869	96.296	95.798	95.37	98.433	95.869	95.513	95.014	95.655	95.513	96.652	96.439	97.151	98.647	95.442	96.083	95.726	95.085		95.37	96.225	96.154
OL471963_Wee_NRB_SI_NSs	97.65	97.578	99.625	95.274	97.792	99.691	94.872	96.652	95.085	97.543	97.293	95.157	95.442	95.085	94.872	95.085	99.644	95.085	95.157	95.228	96.51	94.872	97.863	97.65	94.943	97.792	97.436	97.293	97.863	97.721	95.228	94.872	94.801	95.157	97.65	97.721	97.792	97.365	95.37		94.658	94.943
MG602673_Chr_NRB_ZW_NSs	94.943	94.801	95.124	98.125	95.014	95.165	97.792	95.014	97.934	94.836	94.516	96.083	96.154	95.94	95.655	95.94	95.014	98.006	96.296	96.225	96.439	97.792	95.085	94.801	95.798	95.157	94.943	94.587	95.157	94.943	98.006	97.792	95.798	96.296	94.872	95.513	95.014	94.658	96.225	94.658		97.863
MW854273_Tob_NRB_BG_NSs	95.228	95.085	95.424	98.125	95.299	95.473	97.863	95.157	98.86	95.121	94.801	96.011	96.225	95.869	95.726	95.869	95.299	98.077	96.225	96.154	96.581	97.863	95.37	95.085	95.869	95.299	95.228	94.872	95.442	95.228	98.219	98.077	95.869	96.225	95.157	95.798	95.299	94.943	96.154	94.943	97.863
c. Pepper_N gene
	PP632109_Pep_BL_RB_N	MW293976_Pep_RB_SK_N	HQ839729_Pep_RB_IT_N	HQ830186_Pep_RB_IT_N	DQ376185_Pep_RB_IT_N	HQ839730_Pep_RB_IT_N	MK692930_Pep_RB_TU_N	DQ915947_Pep_RB_BR_N	KJ649609_Pep_RB_HU_N	PP632112_Pep_NRB_N	LC549181_Pep_NRB_SK_N	MW293979_Pep_NRB_SK_N	MF159071_Pep_NRB_SK_N	MF159072_Pep_NRB_SK_N	MF159068_Pep_NRB_SK_N	OM022877_Pep_NRB_SK_N	DQ376178_Pep_NRB_IT_N	HQ830187_Pep_NRB_IT_N	MG983521_Pep_NRB_IT_N	MG983519_Pep_NRB_IT_N	MG989675_Pep_NRB_IT_N	MG989674_Pep_NRB_IT_N	DQ376184_Pep_NRB_SP_N	KP008134_Pep_NRB_SP_N	KM657114_Pep_NRB_CN_N	MT799179_Pep_NRB_CN_N	KT160282_Pep_NRB_US_N	KU179581_Pep_NRB_US	KU179589_Pep_NRB_US	ON924230_Pep_NRB_DE_N	KC261967_Let_NRB_SK_N	KC261973_Ste_NRB_SK_N	KC261976_Chr_NRB_SK_N	KM076653_Leo_NRB_SK_N	MN493848_Zin_NRB_CN_N	MN861979_Tob_NRB_CN_N	MT241885_Tro_NRB_CN_N	KU179515_Oci_NRB_US_N	MG593199_Dat_NRB_US_N	OL471963_Wee_NRB_SI_N	MG602673_Chr_NRB_ZW_N	MW854273_Tob_NRB_BG_N
PP632109_Pep_BL_RB_N		96.911	97.683	96.911	97.555	97.683	96.654	97.169	96.01	99.743	97.169	95.882	96.139	96.01	96.01	96.01	97.683	96.911	95.753	94.852	97.297	96.396	97.683	97.297	95.495	97.683	97.169	97.941	99.356	97.812	97.169	96.654	95.238	95.753	97.555	97.04	97.683	97.941	96.396	97.426	96.654	96.782
MW293976_Pep_RB_SK_N	96.911		97.941	96.911	98.069	97.941	96.654	96.911	96.268	97.169	97.683	96.396	96.654	96.525	96.525	96.525	97.941	96.911	96.268	95.367	97.812	96.396	98.198	97.812	96.01	98.198	97.169	98.198	96.782	98.069	97.169	96.911	95.367	96.268	98.842	97.555	97.941	98.456	96.525	97.683	96.654	97.04
HQ839729_Pep_RB_IT_N	97.683	97.941		97.683	98.584	100	97.426	97.426	96.782	97.941	98.327	96.911	97.169	97.04	97.04	97.04	100	97.683	96.782	95.882	99.614	97.169	98.713	98.584	96.525	98.713	97.941	98.713	97.555	98.842	97.941	97.683	96.01	96.782	98.584	98.327	98.456	98.713	97.04	99.743	97.426	97.555
HQ830186_Pep_RB_IT_N	96.911	96.911	97.683		97.555	97.683	99.228	97.426	98.456	96.911	97.169	97.297	97.555	97.426	97.426	97.426	97.683	100	97.426	96.525	97.555	98.97	97.683	97.555	96.911	97.683	96.654	97.683	96.525	97.555	99.743	99.228	96.139	97.169	97.555	96.782	97.683	97.683	97.426	97.426	99.228	99.099
DQ376185_Pep_RB_IT_N	97.555	98.069	98.584	97.555		98.584	97.297	97.297	96.911	97.812	99.099	96.782	97.04	96.911	96.911	96.911	98.584	97.555	96.654	95.753	98.198	97.04	99.871	99.228	96.396	99.614	98.069	98.584	97.426	98.713	97.812	97.555	95.882	96.654	99.228	97.941	99.356	98.842	96.911	98.327	97.297	97.941
HQ839730_Pep_RB_IT_N	97.683	97.941	100	97.683	98.584		97.426	97.426	96.782	97.941	98.327	96.911	97.169	97.04	97.04	97.04	100	97.683	96.782	95.882	99.614	97.169	98.713	98.584	96.525	98.713	97.941	98.713	97.555	98.842	97.941	97.683	96.01	96.782	98.584	98.327	98.456	98.713	97.04	99.743	97.426	97.555
MK692930_Pep_RB_TU_N	96.654	96.654	97.426	99.228	97.297	97.426		96.911	98.069	96.654	96.911	97.297	97.555	97.426	97.426	97.426	97.426	99.228	97.426	96.525	97.297	98.713	97.426	97.297	96.911	97.426	96.654	97.683	96.268	97.297	99.485	98.97	96.139	97.169	97.297	96.782	97.426	97.683	97.426	97.169	98.97	98.584
DQ915947_Pep_RB_BR_N	97.169	96.911	97.426	97.426	97.297	97.426	96.911		96.396	96.911	96.911	96.139	96.396	96.525	96.268	96.525	97.426	97.426	96.01	95.109	97.04	96.654	97.426	97.812	95.753	97.426	96.654	97.426	96.782	97.297	97.426	96.911	95.495	96.01	97.297	96.525	97.169	97.683	96.525	97.169	96.911	97.04
KJ649609_Pep_RB_HU_N	96.01	96.268	96.782	98.456	96.911	96.782	98.069	96.396		96.01	96.525	96.396	96.654	96.525	96.525	96.525	96.782	98.456	96.525	95.624	96.396	97.555	97.04	96.654	96.01	97.04	96.268	97.297	95.624	96.911	98.327	97.812	95.495	96.268	96.911	96.396	97.04	97.297	96.525	96.525	98.327	98.713
PP632112_Pep_NRB_N	99.743	97.169	97.941	96.911	97.812	97.941	96.654	96.911	96.01		97.426	96.139	96.396	96.268	96.268	96.268	97.941	96.911	96.01	95.109	97.555	96.396	97.941	97.555	95.753	97.941	97.426	98.198	99.614	98.069	97.169	96.911	95.495	96.01	97.812	97.297	97.941	98.198	96.654	97.683	96.654	96.782
LC549181_Pep_NRB_SK_N	97.169	97.683	98.327	97.169	99.099	98.327	96.911	96.911	96.525	97.426		96.654	96.911	96.782	96.782	96.782	98.327	97.169	96.268	95.367	97.941	96.654	99.228	99.099	96.01	99.228	97.426	98.198	97.04	98.327	97.426	97.169	95.495	96.525	98.842	97.683	98.97	98.456	96.525	98.069	96.911	97.297
MW293979_Pep_NRB_SK_N	95.882	96.396	96.911	97.297	96.782	96.911	97.297	96.139	96.396	96.139	96.654		99.743	99.614	99.871	99.614	96.911	97.297	99.099	98.198	96.525	96.782	96.911	97.04	98.327	96.911	96.396	97.169	95.753	96.911	97.555	97.297	97.297	98.327	96.782	96.525	96.654	97.169	99.099	96.654	97.555	96.911
MF159071_Pep_NRB_SK_N	96.139	96.654	97.169	97.555	97.04	97.169	97.555	96.396	96.654	96.396	96.911	99.743		99.871	99.871	99.871	97.169	97.555	99.356	98.456	96.782	97.04	97.169	97.297	98.584	97.169	96.654	97.426	96.01	97.169	97.812	97.555	97.555	98.584	97.04	96.782	96.911	97.426	99.356	96.911	97.812	97.169
MF159072_Pep_NRB_SK_N	96.01	96.525	97.04	97.426	96.911	97.04	97.426	96.525	96.525	96.268	96.782	99.614	99.871		99.743	100	97.04	97.426	99.228	98.327	96.654	96.911	97.04	97.426	98.456	97.04	96.782	97.297	95.882	97.04	97.683	97.426	97.426	98.456	96.911	96.654	96.782	97.297	99.228	96.782	97.683	97.04
MF159068_Pep_NRB_SK_N	96.01	96.525	97.04	97.426	96.911	97.04	97.426	96.268	96.525	96.268	96.782	99.871	99.871	99.743		99.743	97.04	97.426	99.228	98.327	96.654	96.911	97.04	97.169	98.456	97.04	96.525	97.297	95.882	97.04	97.683	97.426	97.426	98.456	96.911	96.654	96.782	97.297	99.228	96.782	97.683	97.04
OM022877_Pep_NRB_SK_N	96.01	96.525	97.04	97.426	96.911	97.04	97.426	96.525	96.525	96.268	96.782	99.614	99.871	100	99.743		97.04	97.426	99.228	98.327	96.654	96.911	97.04	97.426	98.456	97.04	96.782	97.297	95.882	97.04	97.683	97.426	97.426	98.456	96.911	96.654	96.782	97.297	99.228	96.782	97.683	97.04
DQ376178_Pep_NRB_IT_N	97.683	97.941	100	97.683	98.584	100	97.426	97.426	96.782	97.941	98.327	96.911	97.169	97.04	97.04	97.04		97.683	96.782	95.882	99.614	97.169	98.713	98.584	96.525	98.713	97.941	98.713	97.555	98.842	97.941	97.683	96.01	96.782	98.584	98.327	98.456	98.713	97.04	99.743	97.426	97.555
HQ830187_Pep_NRB_IT_N	96.911	96.911	97.683	100	97.555	97.683	99.228	97.426	98.456	96.911	97.169	97.297	97.555	97.426	97.426	97.426	97.683		97.426	96.525	97.555	98.97	97.683	97.555	96.911	97.683	96.654	97.683	96.525	97.555	99.743	99.228	96.139	97.169	97.555	96.782	97.683	97.683	97.426	97.426	99.228	99.099
MG983521_Pep_NRB_IT_N	95.753	96.268	96.782	97.426	96.654	96.782	97.426	96.01	96.525	96.01	96.268	99.099	99.356	99.228	99.228	99.228	96.782	97.426		99.099	96.396	96.911	96.782	96.654	98.198	96.782	96.525	97.04	95.624	96.782	97.683	97.426	96.911	98.456	96.654	96.396	96.782	97.04	98.97	96.525	97.683	97.04
MG983519_Pep_NRB_IT_N	94.852	95.367	95.882	96.525	95.753	95.882	96.525	95.109	95.624	95.109	95.367	98.198	98.456	98.327	98.327	98.327	95.882	96.525	99.099		95.495	96.139	95.882	95.753	97.297	95.882	95.624	96.268	94.723	96.01	96.782	96.525	96.01	97.555	95.753	95.495	95.882	96.268	98.069	95.624	96.782	96.139
MG989675_Pep_NRB_IT_N	97.297	97.812	99.614	97.555	98.198	99.614	97.297	97.04	96.396	97.555	97.941	96.525	96.782	96.654	96.654	96.654	99.614	97.555	96.396	95.495		97.04	98.327	98.198	96.139	98.327	97.555	98.327	97.169	98.456	97.812	97.555	95.624	96.396	98.198	97.941	98.069	98.327	96.654	99.356	97.04	97.169
MG989674_Pep_NRB_IT_N	96.396	96.396	97.169	98.97	97.04	97.169	98.713	96.654	97.555	96.396	96.654	96.782	97.04	96.911	96.911	96.911	97.169	98.97	96.911	96.139	97.04		97.169	97.04	96.396	97.169	96.139	97.169	96.01	97.04	99.228	98.713	95.624	96.654	97.04	96.268	97.169	97.169	96.911	96.911	98.456	98.327
DQ376184_Pep_NRB_SP_N	97.683	98.198	98.713	97.683	99.871	98.713	97.426	97.426	97.04	97.941	99.228	96.911	97.169	97.04	97.04	97.04	98.713	97.683	96.782	95.882	98.327	97.169		99.356	96.525	99.743	97.941	98.713	97.555	98.842	97.941	97.683	96.01	96.782	99.356	98.069	99.485	98.97	97.04	98.456	97.426	98.069
KP008134_Pep_NRB_SP_N	97.297	97.812	98.584	97.555	99.228	98.584	97.297	97.812	96.654	97.555	99.099	97.04	97.297	97.426	97.169	97.426	98.584	97.555	96.654	95.753	98.198	97.04	99.356		96.396	99.356	97.812	98.327	97.169	98.456	97.812	97.555	95.882	96.654	98.97	97.683	99.099	98.584	96.911	98.327	97.297	97.426
KM657114_Pep_NRB_CN_N	95.495	96.01	96.525	96.911	96.396	96.525	96.911	95.753	96.01	95.753	96.01	98.327	98.584	98.456	98.456	98.456	96.525	96.911	98.198	97.297	96.139	96.396	96.525	96.396		96.525	96.01	96.782	95.367	96.525	97.169	97.169	96.654	97.941	96.396	96.396	96.268	96.782	98.456	96.268	97.169	96.525
MT799179_Pep_NRB_CN_N	97.683	98.198	98.713	97.683	99.614	98.713	97.426	97.426	97.04	97.941	99.228	96.911	97.169	97.04	97.04	97.04	98.713	97.683	96.782	95.882	98.327	97.169	99.743	99.356	96.525		97.941	98.713	97.555	98.842	97.941	97.683	95.753	96.782	99.356	98.069	99.743	98.97	97.04	98.456	97.426	97.812
KT160282_Pep_NRB_US_N	97.169	97.169	97.941	96.654	98.069	97.941	96.654	96.654	96.268	97.426	97.426	96.396	96.654	96.782	96.525	96.782	97.941	96.654	96.525	95.624	97.555	96.139	97.941	97.812	96.01	97.941		98.198	97.04	98.198	96.911	96.654	95.495	96.525	97.812	97.555	97.683	98.198	96.654	97.683	96.654	96.782
KU179581_Pep_NRB_US_N	97.941	98.198	98.713	97.683	98.584	98.713	97.683	97.426	97.297	98.198	98.198	97.169	97.426	97.297	97.297	97.297	98.713	97.683	97.04	96.268	98.327	97.169	98.713	98.327	96.782	98.713	98.198		97.812	99.099	97.941	97.683	96.268	97.04	98.584	98.327	98.456	99.743	97.297	98.456	97.683	97.812
KU179589_Pep_NRB_US_N	99.356	96.782	97.555	96.525	97.426	97.555	96.268	96.782	95.624	99.614	97.04	95.753	96.01	95.882	95.882	95.882	97.555	96.525	95.624	94.723	97.169	96.01	97.555	97.169	95.367	97.555	97.04	97.812		97.683	96.782	96.525	95.367	95.624	97.426	96.911	97.555	97.812	96.268	97.297	96.268	96.396
ON924230_Pep_NRB_DE_N	97.812	98.069	98.842	97.555	98.713	98.842	97.297	97.297	96.911	98.069	98.327	96.911	97.169	97.04	97.04	97.04	98.842	97.555	96.782	96.01	98.456	97.04	98.842	98.456	96.525	98.842	98.198	99.099	97.683		97.812	97.555	95.882	96.782	98.713	98.198	98.584	99.099	97.04	98.584	97.297	97.683
KC261967_Let_NRB_SK_N	97.169	97.169	97.941	99.743	97.812	97.941	99.485	97.426	98.327	97.169	97.426	97.555	97.812	97.683	97.683	97.683	97.941	99.743	97.683	96.782	97.812	99.228	97.941	97.812	97.169	97.941	96.911	97.941	96.782	97.812		99.485	96.396	97.426	97.812	97.04	97.941	97.941	97.683	97.683	99.228	99.099
KC261973_Ste_NRB_SK_N	96.654	96.911	97.683	99.228	97.555	97.683	98.97	96.911	97.812	96.911	97.169	97.297	97.555	97.426	97.426	97.426	97.683	99.228	97.426	96.525	97.555	98.713	97.683	97.555	97.169	97.683	96.654	97.683	96.525	97.555	99.485		96.139	97.169	97.555	96.782	97.683	97.683	97.426	97.426	98.713	98.584
KC261976_Chr_NRB_SK_N	95.238	95.367	96.01	96.139	95.882	96.01	96.139	95.495	95.495	95.495	95.495	97.297	97.555	97.426	97.426	97.426	96.01	96.139	96.911	96.01	95.624	95.624	96.01	95.882	96.654	95.753	95.495	96.268	95.367	95.882	96.396	96.139		97.683	95.624	95.624	95.495	96.01	97.297	96.01	96.396	96.268
KM076653_Leo_NRB_SK_N	95.753	96.268	96.782	97.169	96.654	96.782	97.169	96.01	96.268	96.01	96.525	98.327	98.584	98.456	98.456	98.456	96.782	97.169	98.456	97.555	96.396	96.654	96.782	96.654	97.941	96.782	96.525	97.04	95.624	96.782	97.426	97.169	97.683		96.654	96.396	96.525	97.04	98.456	96.525	97.426	96.782
MN493848_Zin_NRB_CN_N	97.555	98.842	98.584	97.555	99.228	98.584	97.297	97.297	96.911	97.812	98.842	96.782	97.04	96.911	96.911	96.911	98.584	97.555	96.654	95.753	98.198	97.04	99.356	98.97	96.396	99.356	97.812	98.584	97.426	98.713	97.812	97.555	95.624	96.654		98.198	99.099	98.842	96.911	98.327	97.297	97.683
MN861979_Tob_NRB_CN_N	97.04	97.555	98.327	96.782	97.941	98.327	96.782	96.525	96.396	97.297	97.683	96.525	96.782	96.654	96.654	96.654	98.327	96.782	96.396	95.495	97.941	96.268	98.069	97.683	96.396	98.069	97.555	98.327	96.911	98.198	97.04	96.782	95.624	96.396	98.198		97.812	98.327	96.654	98.069	97.04	96.911
MT241885_Tro_NRB_CN_N	97.683	97.941	98.456	97.683	99.356	98.456	97.426	97.169	97.04	97.941	98.97	96.654	96.911	96.782	96.782	96.782	98.456	97.683	96.782	95.882	98.069	97.169	99.485	99.099	96.268	99.743	97.683	98.456	97.555	98.584	97.941	97.683	95.495	96.525	99.099	97.812		98.713	96.782	98.198	97.426	97.812
KU179515_Oci_NRB_US_N	97.941	98.456	98.713	97.683	98.842	98.713	97.683	97.683	97.297	98.198	98.456	97.169	97.426	97.297	97.297	97.297	98.713	97.683	97.04	96.268	98.327	97.169	98.97	98.584	96.782	98.97	98.198	99.743	97.812	99.099	97.941	97.683	96.01	97.04	98.842	98.327	98.713		97.297	98.456	97.683	97.812
MG593199_Dat_NRB_US_N	96.396	96.525	97.04	97.426	96.911	97.04	97.426	96.525	96.525	96.654	96.525	99.099	99.356	99.228	99.228	99.228	97.04	97.426	98.97	98.069	96.654	96.911	97.04	96.911	98.456	97.04	96.654	97.297	96.268	97.04	97.683	97.426	97.297	98.456	96.911	96.654	96.782	97.297		96.782	97.683	97.04
OL471963_Wee_NRB_SI_N	97.426	97.683	99.743	97.426	98.327	99.743	97.169	97.169	96.525	97.683	98.069	96.654	96.911	96.782	96.782	96.782	99.743	97.426	96.525	95.624	99.356	96.911	98.456	98.327	96.268	98.456	97.683	98.456	97.297	98.584	97.683	97.426	96.01	96.525	98.327	98.069	98.198	98.456	96.782		97.169	97.297
MG602673_Chr_NRB_ZW_N	96.654	96.654	97.426	99.228	97.297	97.426	98.97	96.911	98.327	96.654	96.911	97.555	97.812	97.683	97.683	97.683	97.426	99.228	97.683	96.782	97.04	98.456	97.426	97.297	97.169	97.426	96.654	97.683	96.268	97.297	99.228	98.713	96.396	97.426	97.297	97.04	97.426	97.683	97.683	97.169		98.842
MW854273_Tob_NRB_BG_N	96.782	97.04	97.555	99.099	97.941	97.555	98.584	97.04	98.713	96.782	97.297	96.911	97.169	97.04	97.04	97.04	97.555	99.099	97.04	96.139	97.169	98.327	98.069	97.426	96.525	97.812	96.782	97.812	96.396	97.683	99.099	98.584	96.268	96.782	97.683	96.911	97.812	97.812	97.04	97.297	98.842
