# Supplementary material for: Resistance Broken: Integrated Genomic and Phenotypic Insights into Tomato Spotted Wilt Virus Strains Overcoming Sw-5b and Tsw Resistance
Source: Research Square preprint supplement (doi:10.21203/rs.3.rs-7776191/v1), 2025-10-10
Supplement: Supplementary file 2 [file 8a3dd7d6cf91de180ff00851.xlsx]

## Sheet: Selection (positive)
Supplementary Table S7 Positively selected codons in different TSWV genes
Group	Gene	Codona	alpha (α)b	beta (β)c	beta-alpha (β-α)d	Prob[alpha<beta]e	Prob[alpha>beta]f	Amino acid changes in Tomato_RB (study isolates)g	Amino acid changes in Tomato_RB (others)h	Amino acid changes in Tomato_NRBi	Amino acid changes in Others_NRBj
Tomato	RdRP	2	0.492456	0.537073	0.0446173	0.531175	0.403524	N to T	No change	No change	No change
		4	0.537458	0.649016	0.111558	0.558429	0.380044	No change	No change	No change	Q to K
		85	0.648627	0.883132	0.234505	0.668988	0.273081	No change	S to G	S to N	S to G, N
		202	0.478602	0.925195	0.446593	0.720033	0.228023	No change	No change	Y to T	No change
		228	0.595453	0.951202	0.35575	0.705556	0.238872	No change	No change	No change	V to I
		249	0.458512	0.61409	0.155578	0.590917	0.346651	No change	L to V	No change	No change
		265	0.541538	0.556651	0.0151136	0.515624	0.420436	No change	No change	K to R	No change
		290	0.679584	0.914778	0.235194	0.663982	0.27777	No change	No change	R to G	R to I
		385	0.472004	1.12324	0.651235	0.79388	0.160221	No change	No change	N to H, S	N to H
		396	0.597447	0.901462	0.304015	0.693745	0.249819	No change	T to A	T to V, A	T to V, A
		413	0.710127	0.732618	0.0224906	0.568699	0.371669	No change	D to E	D to E	D to E
		432	0.62088	2.6839	2.06302	0.863998	0.0970755	K to E	No change	No change	K to E
		487	0.611056	1.32713	0.71607	0.781207	0.167716	No change	No change	No change	V to T
		495	0.49273	0.5374	0.0446702	0.531245	0.403472	No change	No change	No change	N to D
		503	0.663953	0.667605	0.00365194	0.555099	0.38448	S to G	S to G	No change	No change
		507	0.597722	0.965706	0.367983	0.707595	0.236989	V to I	V to I	No change	V to I
		508	0.618967	0.729153	0.110186	0.59971	0.34083	V to I	V to I	V to I	V to I
		518	0.492291	0.541084	0.0487933	0.53367	0.401193	N to T	No change	No change	No change
		543	0.708248	0.806269	0.0980209	0.591829	0.349155	No change	No change	No change	K to R, E
		572	0.66596	0.760919	0.0949598	0.593845	0.346885	N to S	N to S	N to I	N to S
		591	0.751313	2.40991	1.6586	0.870697	0.0760252	4 S	S to G	G to S	G to S, C
		597	0.457149	0.698349	0.2412	0.674515	0.268838	No change	No change	T to I	T to I
		814	0.673045	0.680238	0.00719286	0.55814	0.381611	No change	No change	S to N	S to N
		823	0.70046	0.704318	0.00385767	0.558647	0.381323	R to K	R to K	R to I	R to K
		937	0.795986	0.945589	0.149603	0.62428	0.318408	No change	No change	D to R	No change
		1088	0.706845	0.785314	0.0784692	0.586314	0.354456	K to R	K to R	No change	No change
		1099	0.613887	0.668555	0.0546675	0.575102	0.364463	P to S	No change	S to P	S to P
		1101	0.565405	0.605108	0.0397035	0.528733	0.408944	No change	No change	No change	L to F
		1120	0.531531	0.760796	0.229265	0.65287	0.289632	E to L	No change	No change	No change
		1130	0.950052	1.21083	0.260775	0.674707	0.2652	I to L	No change	I to T	I to V
		1156	0.639772	1.17646	0.53669	0.751272	0.194258	M to V, I 2	M to V	M to V	M to V
		1266	0.456533	0.714125	0.257592	0.681084	0.262841	No change	V to I2	V to I	V to I
		1406	0.612076	0.705131	0.093055	0.593175	0.347015	No change	No change	V to I	V to I
		1562	0.625693	0.75685	0.131157	0.607268	0.333653	No change	No change	I to Y	No change
		1569	0.572684	0.603796	0.0311115	0.524801	0.412913	No change	No change	L to F	No change
		1572	0.675541	0.707561	0.0320204	0.570048	0.370009	No change	No change	C to L	No change
		1573	0.501532	0.716205	0.214673	0.65402	0.288262	No change	No change	C to L	No change
		1575	0.713356	0.739251	0.0258949	0.56867	0.371645	No change	No change	E to R	No change
		1581	0.678972	0.90464	0.225667	0.624896	0.317451	No change	No change	Y to L	No change
		1675	0.490687	0.585049	0.0943621	0.558158	0.378361	Y to S	No change	No change	No change
		1709	0.702205	0.73557	0.0333645	0.570908	0.369367	No change	No change	E to G	E to G
		1784	0.676461	1.22401	0.547548	0.716451	0.228943	No change	No change	No change	K to R
		1795	0.483623	0.785243	0.30162	0.687921	0.256914	No change	N to S	No change	N to S
		1797	0.541609	0.555955	0.0143461	0.515249	0.420792	No change	No change	No change	K to E
		1898	0.546336	0.83104	0.284704	0.66458	0.27896	No change	K to N	No change	K to R
		1922	0.465911	0.518826	0.0529155	0.535623	0.397841	3V to I	No change	No change	No change
		1948	0.490924	0.586309	0.0953844	0.558609	0.377955	Y to F	No change	No change	No change
		2016	0.959132	1.77149	0.812354	0.691361	0.252717	N to K, P	N to K	N to K	N to K
		2144	0.611646	0.69986	0.0882136	0.59113	0.348973	No change	No change	No change	V to A
		2167	0.510934	1.23616	0.725223	0.785402	0.167527	3R to K	No change	No change	K to R
		2208	0.676976	0.915964	0.238988	0.665557	0.276272	No change	No change	No change	R to K
		2226	0.677557	1.22039	0.542838	0.715024	0.230288	3R to K	No change	K to R	K to E
		2237	0.456508	0.717796	0.261288	0.682522	0.261529	No change	No change	V to I	V to I
		2277	0.564232	1.04215	0.477918	0.736215	0.210844	No change	E to D	E to D	E to D
		2279	0.615552	0.674863	0.0593103	0.577551	0.362114	L to I	L to I	No change	No change
		2306	0.692264	1.07814	0.385872	0.646438	0.297427	No change	No change	Q to T	No change
		2308	0.977142	1.12092	0.143778	0.48794	0.440177	No change	No change	Q to T	No change
		2310	0.611985	0.712718	0.100733	0.596453	0.343864	No change	No change	V to C	No change
		2313	0.713356	0.739251	0.0258949	0.56867	0.371645	No change	No change	E to R	No change
		2317	0.458667	0.652851	0.194184	0.651466	0.290047	No change	No change	A to C	No change
		2323	0.640092	0.846467	0.206375	0.660572	0.281011	T to A	T to A	No change	T to A
		2364	0.483153	0.676524	0.193371	0.647799	0.293828	No change	S to G	No change	S to G
		2418	0.70629	0.810707	0.104417	0.593577	0.347458	No change	No change	K to R	K to T
		2419	0.535642	0.76463	0.228988	0.651905	0.290585	E to Y	No change	No change	No change
		2425	0.458697	0.755753	0.297056	0.694256	0.250897	I to V	No change	No change	I to V
		2474	0.686719	0.975332	0.288613	0.675189	0.267197	R to K	K to S	R to K	R to K
		2481	0.664781	0.778314	0.113532	0.599925	0.341034	N to D	N to D	No change	N to D, I
		2496	0.536255	0.64598	0.109726	0.558355	0.38006	No change	No change	No change	Q to R
		2569	0.487903	0.802297	0.314395	0.690301	0.254793	No change	N to R	No change	No change
		2614	0.679947	0.73753	0.0575833	0.579423	0.360879	E to D	E to D	No change	E to D
		2626	0.706076	0.810205	0.104129	0.593288	0.347747	No change	No change	K to R	K to R
		2668	0.706372	0.827791	0.121419	0.598317	0.342898	No change	K to R	No change	K to R
		2679	0.53416	5.38723	4.85307	0.975029	0.0108105	F to S	F to S	F to S	F to S, A
		2746	0.666353	0.763975	0.0976222	0.594734	0.346034	N to S	N to S	No change	No change
		2775	0.603438	0.955639	0.352201	0.703501	0.240745	S to Y	S to Y	No change	S to P, H
		2796	0.573149	0.750715	0.177565	0.628535	0.312861	E to D	E to D	No change	No change
		2821	0.491016	0.583739	0.0927233	0.557355	0.37912	No change	No change	Y to H	No change
		2863	0.712757	0.757945	0.0451881	0.57567	0.364819	No change	No change	E to K	E to K
		2872	0.627759	1.11102	0.483264	0.719441	0.22624	F to I	F to I2	F to S	F to S, I
		2877	0.500362	0.506428	0.00606614	0.506689	0.426841	No change	No change	D to E	No change
	GnGc	52	0.538853	0.64329	0.104437	0.581387	0.357923	A to V	No change	A to V	No change
		73	1.15423	1.17101	0.0167761	0.512329	0.404816	N to I	No change	N to S	N to T
		79	0.51432	0.591758	0.0774372	0.525023	0.412571	No change	Q to R	No change	Q to R
		83	0.426625	0.45091	0.0242851	0.506508	0.423252	No change	No change	T to I	No change
		90	0.665352	0.75334	0.0879881	0.575998	0.363677	E to Q	E to K	E to K	E to K
		91	0.597289	0.690663	0.0933735	0.57408	0.365251	No change	No change	S to P	S to P
		99	0.599416	0.649829	0.0504126	0.554237	0.384549	No change	S to P	S to P	S to P
		102	0.641809	2.36383	1.72202	0.807988	0.146899	No change	No change	Q to K, E	Q to E
		174	0.544377	0.705962	0.161585	0.606243	0.334222	No change	I to V	I to V	No change
		219	0.520046	0.521107	0.00106153	0.487703	0.448121	No change	K to R	No change	No change
		270	0.426955	0.478381	0.0514262	0.526247	0.405377	No change	No change	No change	I to V
		384	0.426571	0.474202	0.0476307	0.523716	0.407632	No change	I to V	I to V	I to V
		397	0.433108	0.674341	0.241233	0.667098	0.276381	S to R	No change	S to N	No change
		414	0.590906	0.86487	0.273963	0.670613	0.270764	No change	T to A	T to I, A	T to A
		417	0.396394	1.80541	1.40902	0.901585	0.0708061	G to S, V	G to D	G to D, V	G to D
		453	0.425885	0.476817	0.0509322	0.525824	0.405652	No change	I to V	I to V	I to V
		470	0.571392	0.730082	0.15869	0.606391	0.334049	No change	No change	S to R	S to N
		480	0.567163	0.709757	0.142594	0.596749	0.343423	No change	No change	F to V	F to V
		484	0.4446	0.462115	0.0175152	0.500973	0.43024	No change	S to N	No change	No change
		526	0.567067	0.77085	0.203783	0.618451	0.322736	No change	No change	N to D	N to D
		528	0.528637	0.935305	0.406668	0.716292	0.229044	A to V	A to I	A to V, I	A to V, I
		530	0.396825	2.6034	2.20658	0.965258	0.0206123	H to Q	H to R	H to Y, D, R, N	H to N, R
		551	0.441582	0.509092	0.0675108	0.534993	0.398779	No change	No change	N to S	No change
		564	0.444588	0.462285	0.0176975	0.501108	0.430115	No change	No change	No change	S to N
		603	0.425825	0.798091	0.372266	0.71259	0.235207	No change	N to D	N to D	N to D
		608	0.428545	0.930838	0.502293	0.77701	0.175754	S to N	S to N	No change	S to N, R
		624	0.537968	0.672497	0.134529	0.595754	0.344168	No change	No change	V to I	V to I
		654	0.600791	0.656214	0.0554229	0.556785	0.38209	No change	No change	T to K	T to A
		662	0.426873	0.479974	0.0531013	0.527405	0.404317	No change	I to V	No change	No change
		707	0.443606	0.475128	0.0315218	0.510712	0.421218	F to S	No change	No change	No change
		709	0.568602	0.722215	0.153613	0.601919	0.338441	D to I	No change	No change	No change
		763	0.544213	0.701423	0.15721	0.604643	0.33574	No change	No change	I to V	I to V
		810	0.443218	0.4614	0.0181829	0.501501	0.429617	No change	No change	S to G	S to G
		862	0.426571	0.474202	0.0476307	0.523716	0.407632	No change	I to V	I to V	I to V
		922	0.637457	1.02995	0.392492	0.692469	0.25003	No change	R to K	R to K	R to K
		929	0.761826	1.30517	0.543345	0.67934	0.245232	No change	No change	S to K, R	S to R, G
		949	0.443447	0.474553	0.0311063	0.510456	0.421436	No change	No change	No change	F to S
		1005	0.541406	0.67425	0.132844	0.594518	0.345383	No change	S to F	S to F	S to F
		1014	0.544185	0.695964	0.151779	0.602374	0.337904	No change	No change	I to V	I to V
		1016	0.66586	0.735766	0.0699057	0.569652	0.369857	No change	No change	E to K	No change
		1069	0.692388	1.36083	0.668446	0.757169	0.187197	I to V	I to V, A	I to V	I to V
		1074	0.443204	0.478161	0.0349565	0.513095	0.418995	No change	No change	F to S	F to S
		1078	0.492096	0.668033	0.175937	0.620094	0.32066	No change	No change	V to A, M	V to A
		1090	0.663641	0.814028	0.150387	0.594344	0.345941	No change	K to R	K to E	No change
		1094	0.520178	0.520249	7.08677e-05	0.487123	0.448679	K to Q	No change	No change	No change
		1109	0.614209	0.723388	0.109178	0.582146	0.357527	No change	D to E	D to G, E	D to E
		1113	0.651093	1.24924	0.598149	0.721032	0.223674	Q3 to K	No change	K to R	K to R
	NSm	4	0.545536	0.747932	0.202397	0.641017	0.299277	No change	No change	L to F	L to F
		6	0.536833	1.82569	1.28886	0.865229	0.0944145	No change	G to S	G to S	G to S
		8	0.542858	0.618879	0.0760207	0.54333	0.39384	No change	No change	No change	K to R
		9	0.528017	0.545285	0.0172682	0.513243	0.422116	No change	G to R	G to R	G to R
		14	0.727963	1.08707	0.359109	0.632085	0.291878	No change	No change	No change	A to T, S
		52	0.541464	0.771296	0.229832	0.648774	0.291889	No change	T to A	T to A	T to A
		75	0.432777	0.562508	0.129732	0.583128	0.352638	No change	No change	No change	I to T
		116	0.542964	0.620308	0.077344	0.543851	0.393349	No change	K to R	No change	No change
		118	1.41344	2.3623	0.948861	0.701166	0.207346	C to F	C to Y, F	C to Y	C to F
		125	0.593126	0.611237	0.0181107	0.521306	0.41591	K to R	No change	No change	No change
		163	0.430282	0.55094	0.120658	0.57861	0.356634	No change	No change	V to I	No change
		270	0.592851	0.610262	0.0174112	0.520974	0.416225	No change	No change	K to R	K to R
		278	0.588184	0.604134	0.0159494	0.523083	0.414042	No change	N to S	No change	No change
		291	0.549808	0.552436	0.00262769	0.508796	0.426991	No change	No change	S to Y	No change
		295	0.53441	1.08732	0.552915	0.760259	0.187523	No change	No change	A to I	A to S
	NSs	5	0.520538	0.537006	0.0164679	0.50894	0.428414	No change	No change	V to I	No change
		29	0.520974	0.521646	0.000671984	0.498775	0.438211	No change	S to P	No change	No change
		57	0.420533	0.538465	0.117932	0.57708	0.360109	G to S	G to S	No change	G to S
		74	0.520967	0.524941	0.00397371	0.500947	0.436118	No change	S to F	No change	No change
		78	0.537955	1.04668	0.508722	0.703393	0.242888	No change	Y to H	No change	Y to F
		81	0.527604	0.545923	0.0183189	0.510841	0.426776	No change	No change	I to V	No change
		85	0.527604	0.545923	0.0183189	0.510841	0.426776	No change	No change	I to V	No change
		88	0.432631	0.535311	0.10268	0.565395	0.371581	No change	No change	No change	S to N
		92	0.537203	1.6245	1.0873	0.811739	0.143088	No change	No change	D to N	D to N
		107	0.520959	0.521842	0.000883606	0.499043	0.437948	T to A	T to A	T to A	T to A
		130	0.723211	0.773745	0.0505341	0.49148	0.433331	T to I	T to I	T to I	T to I
		132	0.430816	0.6058	0.174984	0.602908	0.336909	No change	No change	No change	N to T
		150	0.538028	0.970534	0.432507	0.69318	0.25212	No change	No change	N to D	N to S
		161	0.520953	0.522332	0.00137915	0.499243	0.43776	No change	No change	S to P	No change
		162	0.441855	0.636084	0.19423	0.605518	0.334982	No change	No change	No change	L to S
		167	0.539589	0.596235	0.056646	0.530123	0.408499	No change	No change	E to D	No change
		172	0.413825	0.826764	0.412939	0.738026	0.212083	No change	No change	I to V	I to V
		202	0.543093	0.59292	0.049827	0.529298	0.409345	No change	N to S	N to S	N to S
		210	0.430898	0.608167	0.177269	0.603811	0.336085	No change	No change	N to Y	No change
		248	0.432599	0.536354	0.103755	0.566065	0.370959	No change	No change	S to N	No change
		260	0.943031	2.1992	1.25617	0.745917	0.173079	I to V	I to V	I to V	I to V
		262	0.527791	0.546119	0.0183283	0.510866	0.426757	I to T	No change	No change	No change
		283	0.432314	0.539247	0.106933	0.567927	0.369223	No change	No change	No change	C to R
		287	0.543951	0.548011	0.00405952	0.504989	0.432804	No change	No change	H to Y	H to Y
		297	0.520737	0.529402	0.00866496	0.504024	0.433149	No change	T to S	T to S	T to S
		300	0.432421	0.542513	0.110092	0.569786	0.367509	No change	No change	No change	C to S
		303	0.529432	0.768061	0.238629	0.585409	0.355948	No change	No change	No change	Q to P
		309	0.538579	0.783217	0.244637	0.651655	0.29069	No change	No change	C to L, F	C to L
		310	0.642703	3.87012	3.22741	0.918557	0.0497189	K to E	K to E	K to Q, E	K to Q
		352	0.520445	0.539676	0.0192314	0.51063	0.426787	No change	No change	V to A	V to A
		354	0.432441	0.541825	0.109384	0.569375	0.367891	No change	No change	No change	C to S
		355	0.430926	0.606586	0.17566	0.603157	0.336685	No change	No change	N to S	No change
		369	0.537369	0.878468	0.341099	0.676272	0.267684	No change	H to Y	H to Y	H to S, Y
		374	0.566473	1.16794	0.601468	0.755398	0.191647	G to R	G to R	G to E	G to E
		379	0.514531	0.769168	0.254637	0.658731	0.284082	No change	No change	G to V	G to D
		381	0.605975	1.21502	0.609045	0.749393	0.196598	R to T	R to T	R to K	R to I, K
		389	0.412097	1.82811	1.41602	0.908121	0.0645836	I to A	I to A	I to A	I to A
		390	0.425202	0.851564	0.426362	0.735348	0.214459	C to Y	C to Y	C to Y	C to Y
		394	0.542772	0.617846	0.0750744	0.539554	0.399523	No change	No change	Y to H	No change
		405	0.521406	0.523715	0.00230896	0.499931	0.43711	S to F	S to F	No change	No change
		436	0.514396	0.737879	0.223483	0.647584	0.294592	No change	S to P	S to P	S to P
		451	0.421097	0.550753	0.129656	0.583378	0.354364	No change	No change	No change	I to V
		453	0.530981	0.617779	0.0867984	0.54338	0.395638	No change	K to R	No change	K to R
		459	1.04886	5.93432	4.88546	0.937255	0.0156371	No change	K to P	K to P, E, S	K to P, L, S
		462	0.544791	7.32106	6.77627	0.991877	0.00182327	Y to C, H	No change	Y to H, C, Q	Y to Q
	N gene	3	0.964028	2.20002	1.23599	0.724368	0.225409	K to S	No change	No change	No change
		10	0.444258	1.61272	1.16846	0.85781	0.107414	No change	No change	S to N	S to N
		18	0.440761	0.874348	0.433588	0.736136	0.214948	G to S	No change	G to S	No change
		33	0.458583	0.664566	0.205983	0.609741	0.332852	No change	No change	N to D	N to D
		40	0.590394	0.62533	0.0349359	0.530489	0.410445	E to D	E to D	No change	No change
		50	0.519475	4.76909	4.24961	0.973407	0.0123434	I to V	I to V	I to V	I to V
		76	0.575498	1.11436	0.538864	0.709232	0.239064	R3 to K	No change	No change	K to R
		89	0.538354	0.557919	0.0195642	0.517472	0.421968	No change	T to I	No change	No change
		110	0.562355	0.66222	0.0998648	0.556107	0.385469	No change	N to S	No change	No change
		116	0.538595	0.558967	0.0203719	0.518014	0.421453	No change	No change	T to I	No change
		174	0.457669	0.714164	0.256495	0.624981	0.318855	No change	No change	Y to H	No change
		187	1.49478	2.63859	1.14381	0.70876	0.196408	R to M	No change	R to K	R to K
		230	0.530768	1.66602	1.13525	0.82628	0.132252	V to I	No change	I to V	I to V
		255	0.535124	1.1536	0.618478	0.772251	0.179171	A to T	A to T	A to T	A to T
Pepper	NSs	40	0.51361	0.928859	0.41525	0.73545	0.209971	No change	Q to P	Q to S, P	Q to P, L
		52	0.397347	0.59764	0.200293	0.661027	0.278307	S to C	No change	S to N	No change
		57	0.369709	0.425534	0.0558246	0.537521	0.38807	No change	No change	G to S	G to S
		65	0.463909	0.608816	0.144907	0.614844	0.322569	No change	No change	L to F	No change
		75	0.469646	0.54862	0.0789735	0.542395	0.391807	Q to R	No change	Q to R	No change
		78	0.504412	0.517654	0.0132415	0.503122	0.430363	No change	Y to F	No change	Y to F
		88	0.399111	0.42077	0.0216586	0.505966	0.420208	No change	No change	S to N	S to N
		92	0.506255	0.684329	0.178074	0.628714	0.310234	No change	No change	D to N	D to N
		93	0.398716	0.462464	0.0637481	0.540611	0.388577	No change	D to N	No change	No change
		132	0.398078	0.480959	0.0828815	0.555059	0.375381	No change	No change	N to T	N to T
		153	0.39848	0.518353	0.119873	0.579861	0.352934	No change	No change	Y to H	No change
		172	0.655037	0.898643	0.243606	0.61471	0.310124	No change	No change	I to V	I to V
		175	0.398923	0.437932	0.039009	0.520697	0.406742	No change	No change	C to Y	No change
		183	0.428374	0.449273	0.020899	0.504521	0.424479	No change	No change	V to A	No change
		202	0.508013	0.922524	0.414511	0.737647	0.208158	N to I	N to S	N to S, I	N to S
		255	0.476242	0.494349	0.0181077	0.503577	0.428655	No change	K to N	No change	No change
		258	0.470581	0.494672	0.0240913	0.507583	0.424566	No change	No change	K to R	No change
		260	0.785592	0.884023	0.0984312	0.542203	0.377454	No change	I to V	I to V	I to V
		283	0.398491	0.437243	0.0387515	0.520512	0.406864	No change	No change	No change	C to R
		288	0.398604	0.480854	0.0822502	0.55452	0.375918	No change	No change	No change	N to D
		297	0.464083	0.638871	0.174788	0.632237	0.306412	No change	T to S	T to S, I	T to S
		300	0.398904	0.439326	0.0404218	0.521878	0.405664	No change	No change	C to S	C to S
		303	0.469803	0.548961	0.0791585	0.542449	0.391766	No change	No change	No change	Q to P
		310	0.558039	0.734403	0.176364	0.622814	0.316069	No change	No change	K to Q	K to Q
		311	0.463607	0.609193	0.145586	0.615306	0.322132	A to V	No change	A to V	A to T
		352	0.466028	0.852633	0.386605	0.743764	0.203138	No change	No change	V to I	V to A
		354	0.39745	0.625358	0.227908	0.677318	0.263697	C to S	No change	C to S	C to S
		355	0.398602	0.481356	0.0827544	0.554885	0.375587	No change	No change	N to S	No change
		369	0.968158	1.41533	0.447169	0.650135	0.262639	No change	H to Y, L	H to Y	H to S, Y
		374	0.491188	1.07262	0.581433	0.800599	0.150516	No change	No change	G to R, E	G to E
		381	0.529586	0.832047	0.302461	0.701906	0.240535	No change	R to K	R to K, I	R to K, I
		389	0.647	3.16425	2.51725	0.970816	0.00985706	No change	A to I	A to I, T, V	A to I
		390	0.399641	0.924593	0.524952	0.805395	0.149969	No change	Y to C	Y to C	Y to C
		414	0.398716	0.462464	0.0637481	0.540611	0.388577	No change	D to N	No change	No change
		424	0.398587	0.462675	0.0640884	0.540874	0.388325	No change	No change	I to T	I to V
		429	0.555165	0.684594	0.129429	0.603733	0.334168	No change	E to K	No change	No change
		436	0.485207	0.888301	0.403094	0.741513	0.204887	No change	S to P	S to P	S to P
		437	0.498713	1.43028	0.931563	0.846354	0.11142	No change	I to V	I to V	I to V
		442	0.826535	1.25537	0.42884	0.657996	0.260405	No change	S to N	No change	No change
		444	0.45245	0.788892	0.336442	0.699614	0.244681	No change	L to F	No change	No change
		445	0.471772	0.729284	0.257512	0.66721	0.2742	No change	K to Q	No change	No change
		447	0.540155	1.3632	0.823044	0.821671	0.131008	No change	D to Q	No change	No change
		448	0.499677	4.90989	4.41021	0.981285	0.00765951	No change	L to N	No change	No change
		449	0.972791	1.48919	0.516395	0.644041	0.251656	No change	S to L	No change	No change
		450	1.2251	1.61785	0.392749	0.6065	0.297076	No change	G to C, R	No change	G to E
		451	0.3985	0.48447	0.0859705	0.557121	0.373546	No change	No change	No change	I to V
		453	0.488986	0.51887	0.0298839	0.511855	0.421446	No change	No change	No change	K to R
		456	0.48647	0.920009	0.43354	0.748292	0.198802	No change	No change	S to F, P	S to F
		459	1.41308	3.77033	2.35726	0.792075	0.0657086	No change	K to P, S	K to P, S	K to P, S, L
		462	0.536329	4.58359	4.04726	0.977913	0.00711519	Y to H	No change	Y to H, C	Y to Q
	N gene	10	0.47944	0.756889	0.277449	0.681718	0.261746	No change	No change	S to N	S to N
		33	0.475198	0.584023	0.108825	0.567423	0.368916	No change	No change	No change	N to D
		50	0.531697	6.04323	5.51154	0.98675	0.00256888	No change	V to I	V to I	V to I
		76	0.606351	0.931108	0.324756	0.669138	0.273379	K to R	No change	K to R	K to R
		208	0.619684	0.66542	0.0457356	0.541295	0.396672	No change	No change	Q to H	No change
		215	1.23029	1.9297	0.699406	0.65557	0.279099	No change	Y to V	No change	No change
		220	1.40941	1.53483	0.125416	0.554015	0.349559	No change	S to Q	S to G	S to G
		221	0.442663	0.768775	0.326113	0.711855	0.234057	No change	S to L	No change	No change
		222	0.667616	1.02769	0.36007	0.675117	0.267465	No change	S to Q	No change	No change
		223	0.732886	0.947692	0.214806	0.636353	0.303481	No change	N to Q	No change	No change
		230	0.575954	4.45346	3.87751	0.960886	0.0161727	No change	I to V, Y	I to V	I to V
		234	1.24258	1.24493	0.00235395	0.579856	0.356549	No change	H to T	No change	No change
		235	0.539459	2.06102	1.52156	0.851539	0.108415	No change	Y to L	Y to F	No change
		240	0.731817	0.778359	0.0465421	0.521028	0.419771	No change	N to T	No change	No change
		251	1.29957	1.30346	0.00388172	0.488509	0.431893	No change	Q to T	No change	No change
		255	0.632333	4.97387	4.34153	0.963153	0.0102747	A to T	A to T, H	A to T	A to T
		256	0.60363	1.16511	0.56148	0.752708	0.193822	No change	E to R	E to G	No change
		257	0.561408	1.34877	0.787361	0.791399	0.159762	No change	L to T	L to V	No change
Blue font: Signifcantly positively selected codons
Red font: Positively selected codons earlier implicated in resistance breaking against Sw5 based resistance
a Codon sites with overabundance of non-synonymous substitutions
b mean posterior synonymous subtitution rate at a codon site
c mean posterior non- synonymous subtitution rate at a codon site
d mean posterior β-α; a positive value indicates an overabundance of non-synonymous substitutions and positive selection
e posterior probability of positive selection at a codon site; significance was determined at Prob [α < β] > 0.900
f posterior probability of negative selection at a codon site; significance was determined at Prob [α > β] > 0.900
g Codon changes due to subtitutions in pepper resistant breaking study isolates
h Codon changes due to substitutions in other pepper resistant breaking isolates
i Codon cganges due to substitutions in pepper non-resistant breaking isolates
j Codon changes due to substitutions at non-resistant breaking isolates from other crops
