# Supplementary material for: Resistance Broken: Integrated Genomic and Phenotypic Insights into Tomato Spotted Wilt Virus Strains Overcoming Sw-5b and Tsw Resistance
Source: Research Square preprint supplement (doi:10.21203/rs.3.rs-7776191/v1), 2025-10-10
Supplement: Supplementary file 3 [file 8aac6fc05044fa1a8e20afc9.xlsx]

## Sheet: Polymorphism
Supplementary Table S4 Polymorphism analysis of different TSWV strains
Group	Gene	Sub group	Number of Sequences	Number of polymorphic (segregating) sites (S)	Nucleotide diversity (Pi)	Average number of nucleotide differences (k)	θw	Total number of Mutations (Eta)	Number of Haplotypes	Haplotype diversity + SD
Tomato	Full genome	Overall	31	3128	0.03683	565.355	0.05101	3357	30	0.998+0.009
		Tomato_RB	7	1518	0.03547	585.905	0.03751	1546	7	1+0.076
		Tomato_NRB	12	1913	0.03375	551.227	0.03878	1988	12	1+0.034
		Others_NRB	12	2106	0.03967	616.909	0.04484	2205	12	1+0.034
	RdRP	Overall	31	1700	0.03492	301.477	0.04929	1814	30	0.998+0.009
		Tomato_RB	7	737	0.03595	310.571	0.03482	747	7	1+0.076
		Tomato_NRB	12	881	0.02878	248.5	0.03379	907	12	1+0.034
		Others_NRB	12	1214	0.03855	333.045	0.04653	1272	12	1+0.034
	GnGc	Overall	31	715	0.04006	136.516	0.05252	769	30	0.998+0.009
		Tomato_RB	7	328	0.03405	116.048	0.03928	335	7	1+0.076
		Tomato_NRB	12	460	0.03848	131.152	0.0447	486	12	1+0.034
		Others_NRB	12	454	0.04364	148.727	0.04411	478	12	1+0.034
	NSm	Overall	31	167	0.03706	33.688	0.04599	179	28	0.994+0.010
		Tomato_RB	7	75	0.0285	25.905	0.03368	78	6	0.952+0.096
		Tomato_NRB	12	126	0.0398	36.182	0.0459	130	12	1+0.034
		Others_NRB	12	102	0.03862	35.106	0.03716	105	11	0.985+0.040
	NSs	Overall	31	271	0.03643	51.144	0.04832	289	30	0.998+0.009
		Tomato_RB	7	98	0.02598	36.476	0.02849	99	7	1+0.076
		Tomato_NRB	12	157	0.03666	51.47	0.03703	164	12	1+0.034
		Others_NRB	12	189	0.03813	53.53	0.04458	195	12	1+0.034
	N gene	Overall	31	112	0.02629	20.428	0.03608	117	30	0.998+0.009
		Tomato_RB	7	51	0.02451	19.048	0.02679	51	7	1+0.076
		Tomato_NRB	12	63	0.02469	19.182	0.02685	66	12	1+0.034
		Others_NRB	12	71	0.02556	19.864	0.03026	73	12	1+0.034
Pepper	S segment	Overall	42	680	0.03562	96.738	0.05819	739	40	0.998+0.006
		Pepper_RB	9	395	0.04294	123.194	0.05066	417	9	1+0.052
		Pepper_NRB	21	438	0.03456	95.519	0.04405	461	21	1+0.015
		Others_NRB	12	359	0.03557	101.667	0.0416	374	12	1+0.034
	NSs	Overall	42	212	0.03351	32.534	0.05074	219	40	0.998+0.006
		Pepper_RB	9	90	0.03115	30.278	0.03407	91	9	1+0.052
		Pepper_NRB	21	217	0.03515	49.314	0.04299	223	21	1+0.015
		Others_NRB	12	189	0.03813	53.53	0.04458	195	12	1+0.034
	N gene	Overall	42	129	0.02563	19.812	0.03878	136	38	0.994+0.007
		Pepper_RB	9	59	0.02393	18.5	0.02808	59	8	0.972+0.064
		Pepper_NRB	21	89	0.02572	19.981	0.03184	94	20	0.995+0.016
		Others_NRB	12	71	0.02556	19.864	0.03026	73	12	1+0.034
*θw- Watterson’s estimator per site based on number of segregating sites
