# Supplementary material for: Resistance Broken: Integrated Genomic and Phenotypic Insights into Tomato Spotted Wilt Virus Strains Overcoming Sw-5b and Tsw Resistance
Source: Research Square preprint supplement (doi:10.21203/rs.3.rs-7776191/v1), 2025-10-10
Supplement: Supplementary file 4 [file b3875571063a242e9e0cf991.xlsx]

## Sheet: Gene flow and differentiation
Supplementary Table S5 Gene flow and genetic differentiation of TSWV strains
Group	Gene	Comparisona	Hsb	Hstc	chi square (χ2)d	P-value (χ2)e	Ktf	Ksg	Ksth	P-value (Ks and Kst)i	Zj	P-value (Z)k	Snnl	p-value (Snn)m	Fstn
Tomato	Full genome	TomatoRB vs TomatoNRB	1	0	19	0.3918 ns	578.181	554.579	0.04082	0.0210 *	80.4177	0.0470 *	0.68421	0.1280 ns	0.07923
		TomatoRB vs OthersNRB	1	0	19	0.3918 ns	601.386	584.981	0.02728	0.1020 ns	83.4748	0.2330 ns	0.63158	0.2480 ns	0.05486
		TomatoNRB vs OthersNRB	1	-0.00364	22	0.4599 ns	559.178	561.818	-0.00472	0.5150 ns	141.254	0.8800 ns	0.64583	0.0930 ns	-0.00909
	RdRP	TomatoRB vs TomatoNRB	1	0	19	0.3918 ns	285.111	271.368	0.0482	0.0170 *	79.5469	0.0310 *	0.68421	0.1450 ns	0.09098
		TomatoRB vs OthersNRB	1	0	19	0.3918 ns	332.047	324.766	0.02193	0.1650 ns	82.8882	0.1730 ns	0.63158	0.2650 ns	0.04403
		TomatoNRB vs OthersNRB	1	-0.00364	22	0.4599 ns	288.25	290.773	-0.00875	0.6160 ns	139.894	0.7770 ns	0.50694	0.4260 ns	-0.01691
	GnGc	TomatoRB vs TomatoNRB	1	0	19	0.3918 ns	128.222	125.587	0.02055	0.1920 ns	81.9647	0.1060 ns	0.57895	0.4020 ns	0.0416
		TomatoRB vs OthersNRB	1	0	19	0.3918 ns	140.409	136.687	0.02651	0.1150 ns	81.9206	0.1310 ns	0.65789	0.1780 ns	0.05413
		TomatoNRB vs OthersNRB	1	-0.00364	22	0.4599 ns	139.322	139.939	-0.00443	0.4610 ns	138.337	0.4540 ns	0.52083	0.4040 ns	-0.00852
	NSm	TomatoRB vs TomatoNRB	0.98413	0.01008	19	0.3285 ns	32.7193	32.3955	0.0099	0.2730 ns	85.0664	0.4560 ns	0.73684	0.0800 ns	0.02079
		TomatoRB vs OthersNRB	0.97403	0.01445	19	0.2687 ns	32.6023	31.7161	0.02718	0.1330 ns	83.6291	0.2250 ns	0.85965	0.0010 **	0.05584
		TomatoNRB vs OthersNRB	0.99242	0.00033	22	0.3995 ns	35.3043	35.6439	-0.00962	0.5610 ns	139.197	0.6200 ns	0.5	0.4420 ns	-0.0186
	NSs	TomatoRB vs TomatoNRB	1	0	19	0.3918 ns	48.9825	45.9458	0.062	0.0380 *	81.5188	0.1030 ns	0.76316	0.0530 ns	0.12325
		TomatoRB vs OthersNRB	1	0	19	0.3918 ns	50.0585	47.2472	0.05616	0.0600 ns	80.6118	0.1200 ns	0.73684	0.0720 ns	0.11282
		TomatoNRB vs OthersNRB	1	-0.00364	22	0.4599 ns	52.6884	52.5	0.00358	0.3040 ns	137.61	0.3710 ns	0.54167	0.3430 ns	0.00683
	N gene	TomatoRB vs TomatoNRB	1	0	19	0.3918 ns	20.8713	19.1324	0.08332	0.0130 *	76.8521	0.0320 *	0.81579	0.0170 *	0.15626
		TomatoRB vs OthersNRB	1	0	19	0.3918 ns	20.4854	19.563	0.04503	0.0500 ns	80.0433	0.0670 ns	0.73684	0.0600 ns	0.08802
		TomatoNRB vs OthersNRB	1	-0.00364	22	0.4599 ns	19.5797	19.5227	0.00291	0.3560 ns	138.114	0.4740 ns	0.56597	0.2500 ns	0.00556
Pepper	S segment	PepperRB vs PepperNRB	1	-0.00462	25.238	0.5611 ns	100.317	99.0667	0.01247	0.1510 ns	211.734	0.1110 ns	0.62778	0.2380 ns	0.02733
		PepperRB vs OthersNRB	1	0	21	0.3971 ns	106.514	107.275	-0.00714	0.5270 ns	103.745	0.3010 ns	0.52381	0.4010 ns	-0.01382
		PepperNRBvsOthersNRB	1	0	33	0.4180 ns	94.0777	94.1661	-0.00094	0.3940 ns	265.028	0.4680 ns	0.62121	0.1880 ns	-0.00197
	NSs	PepperRB vs PepperNRB	1	-0.00462	25.238	0.5611 ns	32.0092	31.3633	0.02018	0.1250 ns	211.807	0.1160 ns	0.55	0.6000 ns	0.04577
		PepperRB vs OthersNRB	1	0	21	0.3971 ns	32.6048	32.8636	-0.00794	0.5000 ns	105.073	0.4110 ns	0.40476	0.7310 ns	-0.01571
		PepperNRBvsOthersNRB	1	0	33	0.4180 ns	50.7349	50.8474	-0.00222	0.4320 ns	264.968	0.4600 ns	0.61111	0.1860 ns	-0.00461
	N gene	PepperRB vs PepperNRB	0.98904	-0.00054	24.444	0.4938 ns	19.9494	19.47	0.02403	0.0720 ns	210.274	0.0820 ns	0.59444	0.3460 ns	0.05437
		PepperRB vs OthersNRB	0.98856	0.00671	21	0.3368 ns	19.1714	19.2792	-0.00562	0.5380 ns	105.102	0.4840 ns	0.3254	0.8990 ns	-0.01105
		PepperNRBvsOthersNRB	0.99688	0.00123	33	0.3695 ns	19.9602	19.9383	0.0011	0.3450 ns	263.875	0.3870 ns	0.57576	0.2820 ns	0.0023
a comparison of isolates beyween population subgroups: TomatoRB vs TomatoNRB = Tomato resistant breaking vs Tomato non resistant breaking, TomatoRB vs OthersNRB = Tomato resistant breaking VS Non-resistant breaking isolates from other crops, TomatoNRB vs OthersNRB = Tomato non resistant breaking vs Non-resistant breaking isolates from other crops, PepperRB vs PepperNRB = Pepper resistant breaking…
b,c,g,h,I and l Hs, Hst, Ks, Kst, Z and Snn are test statistics of genetic differentiation; Kst value close to zero indicates no differentiation, Snn value close to 1 indicates differentiation
n Fst determines the extent of genetic differentiation, Fst value between 0 and 1 indicated interpopulation diversity, Low Fst values indicate a high level of mixing between populations while high Fst values indicate genetically distinct groups
I,k and m P- values were indicators of genetic differentiation between strains.
d, e The χ2 and P values were indicators of genetic differentiation between isolate subgroups; P < 0.05 was considered significant
f Kt is the avaerage number of nucleotide differences across genomes in two subgroup populations
