# Supplementary material for: Resistance Broken: Integrated Genomic and Phenotypic Insights into Tomato Spotted Wilt Virus Strains Overcoming Sw-5b and Tsw Resistance
Source: Research Square preprint supplement (doi:10.21203/rs.3.rs-7776191/v1), 2025-10-10
Supplement: Supplementary file 5 [file cb81ed117186c4dd932cc699.docx]

**Supplementary Table S1** Overlapping primers used for amplification of TSWV segments

| Primer | Primer’s sequence | Primer’s position | Size of amplicon (bp) | Primer annealing temperature (ºC) | Reference |
| --- | --- | --- | --- | --- | --- |
| **S RNA** | | | | | |
| S1 | S1F-5’ TGTATCCCGCAGTCGTTTCT | 2842-2861 | 890bp | 58 | In this study |
| S1R-5’ TTTGGCTTGAAACTGTACAGC | 673-693 |
| S2 | S2F-5’ ACCGATTCCAGCTCCAAGAA | 501-520 | 773 | 58 |
| S2R-5’ GCATCTTCACTGTAATTCAAGG | 1233-1255 |
| S3 | S3F-5’ ACTCACACATCTTTCGCACA | 1121-1140 | 840 | 58 |
| S3R-5’ TGCTTTCTGTGTGTTGTGCT | 1865-1884 |
| S4 | S4F-5’ AGCACAACACACAGAAAGCA | 1865-1884 | 1065 | 58 |
| S4R-5’ AGAGCAATTGTGTCAATTTTAT | 2908-2920 |
| **M RNA** | | | | | |
| M1 | M1F-5’ TCTCATCTTAGACGTCTGCTCA | 4678-4699 | 887 | 58 | In this study |
| M1R-5’ CCCCTTCTTGTATTCTTGGCTG | 706-727 |
| M2 | M2F-5’ CACTCCAGAAAACTGCTGTCA | 670-690 | 1024 | 58 |
| M2R-5’ CATGGGGCTTCTGGGATTAT | 1543-1562 |
| M3 | M3F-5’ TGAGCCAAAATAACTTGCAATGA | 1501-1523 | 880 | 58 |
| M3R-5’ GGAGGTCAGTGCTCAAGGAT | 2363-2382 |
| M4 | M4F-5’ AAACAAGGCATTTTCATAA | 2329-2347 | 990 | 58 |
| M4R-5’ TGTCTCAAATGCCCATGTCT | 3301-3320 |
| M5 | M5F-5’ AGACATGGGCATTTGAGACA | 3301-3320 | 884 | 58 |
| M5R-5’ CCAAAGTCCCGGTTATTCCC | 4165-4184 |
| M6 | M6F-5’ GTTCCATTAGTAGGGTACGAGTT | 4049-4071 | 819 | 58 |
| M6R-5’ TTTGAGTTCAACAGCCTAAG | 81--100 |
| **L RNA** | | | | | |
| LF1 | LF1F-5’ CCCGGATCCAGAGCAAT |  | 1,512 | 62 | Kim et al. 2021 |
| LF1R-5’ GTTGTAATCTACCTCTGAGCTC | 1503–1482 |
| LF2 | LF2F-5’ GAAACACCTTGAGAAGATCATGC | 1284–1306 | 1,450 | 62 |
| LF2R-5’ CATCCTGCTGAGCTTTGTC | 2733–2715 |
| LF3 | LF3F-5’ GAGACTCAACCAGGTGAGG | 2508–2526 | 917 | 60 |
| LF1R-5’ CTATATCTTGGATCTTTGCATTC | 3424–3402 |  |
| LF4 | LF1F-5’ GGTTTGATGAGATCAGAAATAG | 3271–3292 | 1,382 | 60 |
| LF1R-5’ GGGTTCAAAGTTATGCAAAAGC | 4652–4631 |
| LF5 | LF1F-5’ GGTCGATAAAATGCTAACAGAC | 4551–4572 | 1,581 | 58 |
| LF1R-5’ CATTCATTAGAATTGCTGAAAGCC | 6131–6111 |
| LF6 | LF1F-5’ CACGTTTGGAACAGGTTTAATC | 6033–6054 | 1,325 | 58 |
| LF1R-5’ CTAAGCAGGTATCCCGGATG | 7357–7338 |
| LF7 | LF1F-5’ CTTTGGAAACTTATCACAGCAG | 7260–7281 | 1,328 | 58 |
| LF1R-5’ CATCTGTTTCAACAACCTCATC | 8587–8566 |
| LF8 | LF1F-5’ GATATAGAGACATTGTTGCGG | 8146–8166 | 773 | 60 |
| LF1R-5’ CCCGGATCCAGAGCAAT |  |
