# Supplementary material for: Resistance Broken: Integrated Genomic and Phenotypic Insights into Tomato Spotted Wilt Virus Strains Overcoming Sw-5b and Tsw Resistance
Source: Research Square preprint supplement (doi:10.21203/rs.3.rs-7776191/v1), 2025-10-10
Supplement: Supplementary file 6 [file dcd70289ac12576eeb3ac2d1.xlsx]

## Sheet: Sequences
Supplementary Table S2 List of sequences used fot analys
Tomato group
Group	RNA segment	TWSV strain
Tomato_RB	L segment	PP622751_Tom_BL1_RB
		PP622754_Tom_BL2_RB
		PP632104_Tom_CA_RB
		PP622757_Tom_MX_RB
		OR166268_Tom_RB_IT
		KP008130_Tom_RB_SP
		OQ718495_Tom_RB_MX
	M segment	PP622752_Tom_BL1_RB
		PP622755_Tom_BL2_RB
		PP632105_Tom_CA_RB
		PP632102_Tom_MX_RB
		OR166267_Tom_RB_IT
		HM015520_Tom_RB_SP
		OQ718496_Tom_RB_MX
	S segment	PP622753_Tom_BL1_RB
		PP622756_Tom_BL2_RB
		PP632106_Tom_CA_RB
		PP632103_Tom_MX_RB
		OR166266_Tom_RB_IT
		KP008131_Tom_RB_SP
		OQ718497_Tom_RB_MX
Tomato_NRB	L segment	HM581934_Tom_NRB_SK
		KC261968_Tom_NRB_SK
		ON840007_Tom_NRB_IT
		ON840010_Tom_NRB_IT
		KP008128_Tom_NRB_SP
		MF590700_Tom_NRB_CN
		JF960237_Tom_NRB_CN
		MH745369_Tom_NRB_US
		KY250488_Tom_NRB_SA
		OL471955_Tom_NRB_SI
		OL471949_Tom_NRB_SI
		KM365064_Tom_NRB_AU
	M segment	HM581935_Tom_NRB_SK
		KC261969_Tom_NRB_SK
		ON840008_Tom_NRB_IT
		ON840011_Tom_NRB_IT
		FM163373_Tom_NRB_SP
		KY495608_Tom_NRB_CN
		JF960236_Tom_NRB_CN
		KU179512_Tom_NRB_US
		KY250489_Tom_NRB_SA
		OL471956_Tom_NRB_SI
		OL471950_Tom_NRB_SI
		KM365065_Tom_NRB_AU
	S segment	HM581936_Tom_NRB_SK
		KC261970_Tom_NRB_SK
		ON840009_Tom_NRB_IT
		ON840012_Tom_NRB_IT
		KP008129_Tom_NRB_SP
		KY495612_Tom_NRB_CN
		JF960235_Tom_NRB_CN
		KU179513_Tom_NRB_US
		KY250490_Tom_NRB_SA
		OL471957_Tom_NRB_SI
		OL471951_Tom_NRB_SI
		KM365066_Tom_NRB_AU
Others_NRB	L segment	KC261965_Let_NRB_SK
		KC261971_Ste_NRB_SK
		KC261974_Chr_NRB_SK
		KM076651_Leo_NRB_SK
		MN493846_Zin_NRB_CN
		MN870626_Tob_NRB_CN
		MT241883_Tro_NRB_CN
		MH745370_Oci_NRB_US
		MG593197_Dat_NRB_US
		OL471961_Wee_NRB_SI
		MG602671_Chr_NRB_ZW
		MW854271_Tob_NRB_BG
	M segment	KC261966_Let_NRB_SK
		KC261972_Ste_NRB_SK
		KC261975_Chr_NRB_SK
		KM076652_Leo_NRB_SK
		MN493847_Zin_NRB_CN
		MN870630_Tob_NRB_CN
		MT241884_Tro_NRB_CN
		KU179514_Oci_NRB_US
		MG593198_Dat_NRB_US
		OL471962_Wee_NRB_SI
		MG602672_Chr_NRB_ZW
		MW854272_Tob_NRB_BG
	S segment	KC261967_Let_NRB_SK
		KC261973_Ste_NRB_SK
		KC261976_Chr_NRB_SK
		KM076653_Leo_NRB_SK
		MN493848_Zin_NRB_CN
		MN861979_Tob_NRB_CN
		MT241885_Tro_NRB_CN
		KU179515_Oci_NRB_US
		MG593199_Dat_NRB_US
		OL471963_Wee_NRB_SI
		MG602673_Chr_NRB_ZW
		MW854273_Tob_NRB_BG
Pepper group
Group	RNA segment	TWSV strain
Pepper_RB	S segment	PP632109_Pep_BL_RB
		MW293976_Pep_RB_SK
		HQ839729_Pep_RB_IT
		HQ830186_Pep_RB_IT
		DQ376185_Pep_RB_IT
		HQ839730_Pep_RB_IT
		MK692930_Pep_RB_TU
		DQ915947_Pep_RB_BR
		KJ649609_Pep_RB_HU
Pepper_NRB	S segment	PP632112_Pep_NRB
		LC549181_Pep_NRB_SK
		MW293979_Pep_NRB_SK
		MF159071_Pep_NRB_SK
		MF159072_Pep_NRB_SK
		MF159068_Pep_NRB_SK
		OM022877_Pep_NRB_SK
		DQ376178_Pep_NRB_IT
		HQ830187_Pep_NRB_IT
		MG983521_Pep_NRB_IT
		MG983519_Pep_NRB_IT
		MG989675_Pep_NRB_IT
		MG989674_Pep_NRB_IT
		DQ376184_Pep_NRB_SP
		KP008134_Pep_NRB_SP
		KM657114_Pep_NRB_CN
		MT799179_Pep_NRB_CN
		KT160282_Pep_NRB_US
		KU179581_Pep_NRB_US
		KU179589_Pep_NRB_US
		ON924230_Pep_NRB_DE
Others_NRB	S segment	KC261967_Let_NRB_SK
		KC261973_Ste_NRB_SK
		KC261976_Chr_NRB_SK
		KM076653_Leo_NRB_SK
		MN493848_Zin_NRB_CN
		MN861979_Tob_NRB_CN
		MT241885_Tro_NRB_CN
		KU179515_Oci_NRB_US
		MG593199_Dat_NRB_US
		OL471963_Wee_NRB_SI
		MG602673_Chr_NRB_ZW
		MW854273_Tob_NRB_BG
