# Supplementary material for: Resistance Broken: Integrated Genomic and Phenotypic Insights into Tomato Spotted Wilt Virus Strains Overcoming Sw-5b and Tsw Resistance
Source: Research Square preprint supplement (doi:10.21203/rs.3.rs-7776191/v1), 2025-10-10
Supplement: Supplementary file 7 [file e4f0e3bd457a32550e2f06a2.xlsx]

## Sheet: Neutrality
Supplementary Table S6 Population neutrality analysis of TSWV
Group	Gene	Sub group	Tajima's Da	P value	Fu and Li's D statisticb	P-value	Fu and Li's F statisticc	P-value	Fu's F statisticd
Tomato	Full genome	Overall	-1.2758	Not significant, P > 0.10	-1.36776	Not significant, P > 0.10	-1.58503	Not significant, P > 0.10	1.465
		Tomato_RB	-0.42164	Not significant, P > 0.10	-0.31336	Not significant, P > 0.10	-0.37485	Not significant, P > 0.10	3.314
		Tomato_NRB	-0.76978	Not significant, P > 0.10	-0.42857	Not significant, P > 0.10	-0.59225	Not significant, P > 0.10	2.069
		Others_NRB	-0.73411	Not significant, P > 0.10	-0.73176	Not significant, P > 0.10	-0.83604	Not significant, P > 0.10	2.188
	RdRP	Overall	-1.30942	Not significant, P > 0.10	-1.21206	Not significant, P > 0.10	-1.47691	Not significant, P > 0.10	0.287
		Tomato_RB	0.10966	Not significant, P > 0.10	0.35915	Not significant, P > 0.10	0.33633	Not significant, P > 0.10	2.667
		Tomato_NRB	-0.81611	Not significant, P > 0.10	-0.39091	Not significant, P > 0.10	-0.57457	Not significant, P > 0.10	1.207
		Others_NRB	-0.99012	Not significant, P > 0.10	-0.92353	Not significant, P > 0.10	-1.07432	Not significant, P > 0.10	1.53
	GnGc	Overall	-1.13079	Not significant, P > 0.10	-1.1631	Not significant, P > 0.10	-1.36617	Not significant, P > 0.10	-1.492
		Tomato_RB	-0.89005	Not significant, P > 0.10	-0.92525	Not significant, P > 0.10	-1.01784	Not significant, P > 0.10	1.638
		Tomato_NRB	-0.8736	Not significant, P > 0.10	-0.28443	Not significant, P > 0.10	-0.50243	Not significant, P > 0.10	0.461
		Others_NRB	-0.28502	Not significant, P > 0.10	-0.28809	Not significant, P > 0.10	-0.3279	Not significant, P > 0.10	0.613
	NSm	Overall	-0.954	Not significant, P > 0.10	-1.00636	Not significant, P > 0.10	-1.17134	Not significant, P > 0.10	-4.676
		Tomato_RB	-1.08508	Not significant, P > 0.10	-1.08457	Not significant, P > 0.10	-1.20176	Not significant, P > 0.10	1.775
		Tomato_NRB	-0.74619	Not significant, P > 0.10	-0.25137	Not significant, P > 0.10	-0.4358	Not significant, P > 0.10	-1.445
		Others_NRB	0.04514	Not significant, P > 0.10	-0.04712	Not significant, P > 0.10	-0.02599	Not significant, P > 0.10	0.099
	NSs	Overall	-1.13287	Not significant, P > 0.10	-1.76141	Not significant, P > 0.10	-1.83483	Not significant, P > 0.10	-5.368
		Tomato_RB	-0.56825	Not significant, P > 0.10	-0.53372	Not significant, P > 0.10	-0.60017	Not significant, P > 0.10	0.324
		Tomato_NRB	-0.24503	Not significant, P > 0.10	-0.61789	Not significant, P > 0.10	-0.59273	Not significant, P > 0.10	-0.836
		Others_NRB	-0.80326	Not significant, P > 0.10	-1.06637	Not significant, P > 0.10	-1.13761	Not significant, P > 0.10	-0.774
	N gene	Overall	-1.15403	Not significant, P > 0.10	-1.13535	Not significant, P > 0.10	-1.35182	Not significant, P > 0.10	-12.85
		Tomato_RB	-0.49142	Not significant, P > 0.10	-0.67052	Not significant, P > 0.10	-0.69762	Not significant, P > 0.10	-0.533
		Tomato_NRB	-0.56559	Not significant, P > 0.10	-0.77345	Not significant, P > 0.10	-0.81965	Not significant, P > 0.10	-2.85
		Others_NRB	-0.82618	Not significant, P > 0.10	-0.85658	Not significant, P > 0.10	-0.96783	Not significant, P > 0.10	-2.759
Pepper	S segment	Overall	-1.62908	Not significant, 0.10 > P > 0.05	-2.93758	*, P < 0.05	-2.93456	*, P < 0.05	-3.951
		Pepper_RB	-1.02746	Not significant, P > 0.10	-1.08063	Not significant, P > 0.10	-1.20072	Not significant, P > 0.10	1.106
		Pepper_NRB	-1.05367	Not significant, P > 0.10	-1.48532	Not significant, P > 0.10	-1.58275	Not significant, P > 0.10	-1.919
		Others_NRB	-0.84458	Not significant, P > 0.10	-1.01447	Not significant, P > 0.10	-1.10662	Not significant, P > 0.10	0.139
	NSs	Overall	-1.33287	Not significant, P > 0.10	-2.18485	Not significant, 0.10 > P > 0.05	-2.23697	Not significant, 0.10 > P > 0.05	-13.467
		Pepper_RB	-0.49351	Not significant, P > 0.10	-0.49746	Not significant, P > 0.10	-0.55795	Not significant, P > 0.10	-0.682
		Pepper_NRB	-0.84171	Not significant, P > 0.10	-1.37343	Not significant, P > 0.10	-1.4157	Not significant, P > 0.10	-3.743
		Others_NRB	-0.80326	Not significant, P > 0.10	-1.06637	Not significant, P > 0.10	-1.13761	Not significant, P > 0.10	-0.774
	N gene	Overall	-1.36748	Not significant, P > 0.10	-2.2205	Not significant, 0.10 > P > 0.05	-2.28	Not significant, 0.10 > P > 0.05	-15.945
		Pepper_RB	-0.75635	Not significant, P > 0.10	-0.77721	Not significant, P > 0.10	-0.8673	Not significant, P > 0.10	0.149
		Pepper_NRB	-0.95583	Not significant, P > 0.10	-1.21035	Not significant, P > 0.10	-1.32405	Not significant, P > 0.10	-5.63
		Others_NRB	-0.82618	Not significant, P > 0.10	-0.85658	Not significant, P > 0.10	-0.96783	Not significant, P > 0.10	-2.759
	a Tajima’s D compares the nucleotide diversity with the proportion of segregating sites; a negative value provides evidence for population expansion and/or purifying selection at the locus
	b Fu and Li’s D * is based on the differences between the number of singletons and the total number of mutations; a negative value provides evidence for population expansion and/or purifying selection at the locus
	c Fu and Li’s F * is based on the differences between the number of singletons and the average number of nucleotide differences between sequences; a negative value provides evidence for population expansion and/or purifying selection at the locus
	d A negative Fu’s F supported population expansion
